# Supplementary material for: A highly enantioselective and regioselective organocatalytic direct Mannich reaction of methyl alkyl ketones with cyclic imines benzo[e][1,2,3]oxathiazine 2,2-dioxides
Source: Royal Society of Chemistry journal article supplement (doi:10.1039/c4ob01902d), 2014-01-01
Supplement: c4ob01902d1.pdf [file c4ob01902d1.pdf]

## Highly Enantioselective and Regioselective Organocatalytic Direct Mannich Reaction of Methyl Alkyl Ketones with Cyclic Imines Benzo[e][1,2,3]oxathiazine 2,2-dioxides

You-Qing Wang,<sup>\*a</sup> Xiao-Yu Cui,<sup>a</sup> Yuan-Yuan Ren<sup>a</sup> and Yongna Zhang<sup>\*a</sup>

<sup>a</sup> Provincial Key Laboratory of Natural Medicine and Immuno-Engineering, College of Chemistry and Chemical Engineering, Henan University, Kaifeng, Henan 475004, P. R. China.

Fax: (+86)-371-22864665; E-mail: wyouqing@hotmail.com; zhangyongna@henu.edu.cn

### Supporting Information

#### Table of Contents.

|                                                                                   |        |
|-----------------------------------------------------------------------------------|--------|
| 1. General methods.....                                                           | S1     |
| 2. More results on the condition optimization of asymmetric Mannich reaction..... | S1-2   |
| 3. Procedure and data of asymmetric Mannich reaction.....                         | S2-6   |
| 4. X-ray structure for compound 2c .....                                          | S6     |
| Copy of NMR .....                                                                 | S7-29  |
| Copy of HPLC .....                                                                | S30-41 |

#### 1. General methods.

**General:** <sup>1</sup>H NMR, and <sup>13</sup>C NMR spectra were recorded on Bruker DRX-400 spectrometers. The chemical shifts for <sup>1</sup>H NMR were recorded in ppm (δ) relative to tetramethylsilane (TMS) with the solvent resonance employed as the internal standard (CDCl<sub>3</sub>, d 7.26 ppm). The chemical shifts for <sup>13</sup>C NMR were recorded in ppm downfield using the central peak of deuteriochloroform (77.0 ppm) as the internal standard. Flash column chromatography was performed on silica gel (200-300 mesh). TLC analysis was performed using glass-backed plates coated with 0.2 mm silica. After elution, plate was visualized under at 254 nm UV illumination. All commercially available compounds were used as provided without further purification. The solvents were distilled from appropriate drying agents prior to use, unless otherwise noted. Cyclic imines **1** were prepared according to the procedures reported in the literature.<sup>[1]</sup>

#### 2. More results on the condition optimization of asymmetric Mannich reaction

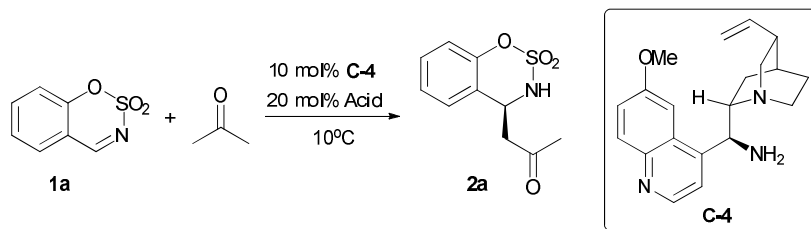

| Entry <sup>a</sup> | Acid    | Solvent | Temp. (°C) | Time (h) | Yield (%) | ee (%) |
|--------------------|---------|---------|------------|----------|-----------|--------|
| 1                  | TFA     | THF     | 10         | 22       | 51        | 90     |
| 2                  | (+)-CSA | THF     | 10         | 72       | 35        | 96     |

<sup>1</sup> (a) S. R. Hanson, L. J. Whalen and C.-H. Wong, *Bioorg. Med. Chem.*, 2006, **14**, 8386; (b) Y. Wang, H. Dong, Y. Zhang and J. Li *Journal of Henan University(Natural Science)* 2013, **43**, 253; (c) Y.-Q. Wang, Y. Zhang, H. Dong, J. Zhang and J. Zhao, *Eur. J. Org. Chem.*, 2013, 3764.

|   |         |         |    |    |    |    |
|---|---------|---------|----|----|----|----|
| 3 | TsOH    | THF     | 10 | 72 | 50 | 95 |
| 4 | AcOH    | THF     | 10 | 96 | 0  | -  |
| 5 | TFA     | Toluene | 10 | 12 | 99 | 96 |
| 6 | (+)-CSA | Toluene | 10 | 84 | 71 | 94 |
| 7 | (-)-CSA | Toluene | 10 | 96 | 75 | 84 |
| 8 | TFA     | Toluene | 0  | 24 | 99 | 91 |

The effects of acid were investigated in THF (entries 1-4). In spite of the best *ee*, the reaction was slower with (+)-CSA than TFA (entries 1 vs 2). However, in optimized solvent (Toluene) TFA afforded the better reactivities and enantioselectivities than CSA (entries 5-7). While temperature was decreased to 0°C, a slightly lower *ee* values was obtained (entry 8).

### 3. Procedure and data of asymmetric Mannich reaction

**Typical procedure:** To the mixture of quinine-NH<sub>2</sub> **C-4** (0.015 mmol, 10 mol%) and cyclic imine **1** (0.15 mmol) in toluene (1.45 mL) was added the solution of TFA (0.03 mmol, 20 mol%) in toluene (0.05 mL). After the reaction mixture was cooled to 10°C, acetone (0.75 mmol) was added. This reaction mixture was stirred in showed reaction time. Direct purification reaction mixture by column chromatography on a silica gel (petroleum ether/DCM) gave the desired Mannich products. The enantiomeric excess was determined by HPLC. Racemic Mannich products were obtained with the combination of 10 mol% benzyl amine and 20 mol% TFA.

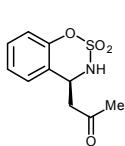

**2a:** Known compound<sup>2</sup>;  $R_f = 0.18$  (CH<sub>2</sub>Cl<sub>2</sub>); 96% *ee*,  $[\alpha]_D^{32} = -21.3$  (*c* 0.97, CHCl<sub>3</sub>); <sup>1</sup>H NMR (400 MHz, CDCl<sub>3</sub>):  $\delta$  7.31 (t,  $J = 7.6$  Hz, 1H), 7.17 (t,  $J = 7.5$  Hz, 1H), 7.11-7.10 (m, 1H), 7.02 (d,  $J = 8.2$  Hz, 1H), 5.82 (s, 1H), 5.17 (dd,  $J = 7.2, 3.8$  Hz, 1H), 3.62 (dd,  $J = 18.1, 7.5$  Hz, 1H), 2.97 (dd,  $J = 18.1, 3.8$  Hz, 1H), 2.24 (s, 3H); <sup>13</sup>C NMR (100 MHz, CDCl<sub>3</sub>):  $\delta$  206.7, 151.1, 129.6, 125.8, 125.4, 121.3, 119.1, 53.3, 46.4, 31.0; HPLC (Chiralcel IC column, hexane/iPrOH = 70/30, 0.8 mL/min, 220 nm):  $t_1 = 10.1$  min (major, *S*),  $t_2 = 15.0$  min.

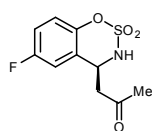

**2b:** White solid; mp 114.4-115.3°C;  $R_f = 0.30$  (CH<sub>2</sub>Cl<sub>2</sub>); 96% *ee*,  $[\alpha]_D^{32} = -18.4$  (*c* 1.03, CHCl<sub>3</sub>); <sup>1</sup>H NMR (400 MHz, CDCl<sub>3</sub>):  $\delta$  7.03-6.96 (m, 2H), 6.84-6.81 (m, 1H), 5.89 (s, 1H), 5.14 (dd,  $J = 6.7, 3.9$  Hz, 1H), 3.57 (dd,  $J = 18.3, 7.4$  Hz, 1H), 2.98 (dd,  $J = 18.3, 4.1$  Hz, 1H), 2.24 (s, 3H); <sup>13</sup>C NMR (100 MHz, CDCl<sub>3</sub>):  $\delta$  206.6, 159.3 (d,  $^1J_{F-C} = 244.3$  Hz), 147.0 (d,  $^4J_{F-C} = 2.7$  Hz), 123.1 (d,  $^3J_{F-C} = 7.1$  Hz), 120.6 (d,  $^3J_{F-C} = 8.3$  Hz), 116.6 (d,  $^2J_{F-C} = 23.5$  Hz), 112.7 (d,  $^2J_{F-C} = 24.8$  Hz), 53.0, 46.4, 30.8; HRMS (ESI): *m/z* calculated for C<sub>10</sub>H<sub>10</sub>FNNaO<sub>4</sub>S [M+Na]<sup>+</sup> 282.0207, found: 282.0210; HPLC (Chiralcel IC column, hexane/iPrOH = 70/30, 0.8 mL/min, 220 nm):  $t_1 = 8.5$  min (major, *S*),  $t_2 = 10.7$  min.

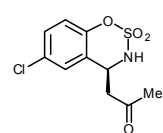

**2c:** White solid; mp 123.2-124.1°C;  $R_f = 0.34$  (CH<sub>2</sub>Cl<sub>2</sub>); 97% *ee*,  $[\alpha]_D^{30} = -52.3$  (*c* 1.17, CHCl<sub>3</sub>); <sup>1</sup>H NMR (400 MHz, CDCl<sub>3</sub>):  $\delta$  7.28 (ddd,  $J = 8.8, 2.4, 0.5$  Hz, 1H), 7.10 – 7.09 (m, 1H), 6.98 (d,  $J = 8.8$  Hz, 1H), 5.78 (d,  $J = 5.2$  Hz, 1H), 5.14 (d,  $J = 3.6$  Hz, 1H), 3.61 (dd,  $J = 18.4, 7.2$  Hz, 1H), 2.99 (dd,  $J = 18.4, 4.0$  Hz, 1H), 2.26 (s, 3H); <sup>13</sup>C NMR (100 MHz, CDCl<sub>3</sub>):  $\delta$  206.3, 149.7, 130.7, 129.7, 125.7, 122.9, 120.5, 53.1, 46.1, 30.9; HRMS (ESI): *m/z* calculated for C<sub>10</sub>H<sub>10</sub>ClNNaO<sub>4</sub>S [M+Na]<sup>+</sup> 297.9911, found: 297.9914; HPLC (Chiralcel IC column, hexane/iPrOH = 70/30, 0.8 mL/min, 220 nm):  $t_1 = 7.2$  min

<sup>2</sup> H.-X. Zhang, J. Nie, H. Cai and J.-A. Ma *Org. Lett.*, 2014, **16**, 2542.

(major, *S*),  $t_2 = 8.5$  min.

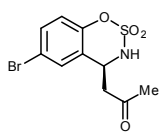

**2d:** White solid; mp 125.3-126.6°C;  $R_f = 0.34$  ( $\text{CH}_2\text{Cl}_2$ ); 91% *ee*,  $[\alpha]_D^{30} = -42.3$  (*c* 0.93,  $\text{CHCl}_3$ );  $^1\text{H NMR}$  (400 MHz,  $\text{CDCl}_3$ ):  $\delta$  7.42 (d,  $J = 8.2$  Hz, 1H), 7.25 (s, 1H), 6.92 (d,  $J = 8.6$  Hz, 1H), 5.82 (s, 1H), 5.15 (s, 1H), 3.61 (dd,  $J = 18.3, 7.0$  Hz, 1H), 2.98 (dd,  $J = 167.6, 1.2$  Hz, 1H), 2.26 (s, 3H);  $^{13}\text{C NMR}$  (100 MHz,  $\text{CDCl}_3$ ):  $\delta$  206.4, 150.1, 132.6, 128.7, 123.3, 120.8, 118.1, 52.9, 46.3, 30.9; HRMS (ESI):  $m/z$  calculated for  $\text{C}_{10}\text{H}_{10}\text{BrNNaO}_4\text{S}$   $[\text{M}+\text{Na}]^+$  341.9406, found: 341.9408; HPLC (Chiralcel IC column, hexane/*i*PrOH = 70/30, 0.8 mL/min, 220 nm):  $t_1 = 7.4$  min (major, *S*),  $t_2 = 8.7$  min.

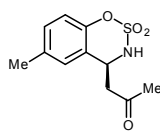

**2e:** White solid; mp 111.9-112.6°C;  $R_f = 0.29$  ( $\text{CH}_2\text{Cl}_2$ ); 95% *ee*,  $[\alpha]_D^{30} = -46.8$  (*c* 1.06,  $\text{CHCl}_3$ );  $^1\text{H NMR}$  (400 MHz,  $\text{CDCl}_3$ ):  $\delta$  7.08 (d,  $J = 8.4$  Hz, 1H),  $\delta$  6.89-6.88 (m, 2H), 5.78 (s, 1H), 5.12 (s, 1H), 3.59 (dd,  $J = 18.1, 7.9$  Hz, 1H), 2.94 (dd,  $J = 18.1, 3.8$  Hz, 1H), 2.30 (s, 3H), 2.23 (s, 3H);  $^{13}\text{C NMR}$  (100 MHz,  $\text{CDCl}_3$ ):  $\delta$  206.7, 149.00, 135.2, 130.2, 126.1, 120.9, 118.8, 53.3, 46.6, 31.0, 20.8; HRMS (ESI):  $m/z$  calculated for  $\text{C}_{11}\text{H}_{13}\text{NNaO}_4\text{S}$   $[\text{M}+\text{Na}]^+$  278.0458, found: 278.0464; HPLC (Chiralcel IC column, hexane/*i*PrOH = 70/30, 0.8 mL/min, 220 nm):  $t_1 = 10.1$  min (major, *S*),  $t_2 = 12.1$  min.

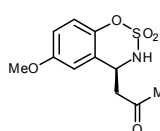

**2f:** White solid; mp 89.3-89.7°C;  $R_f = 0.27$  ( $\text{CH}_2\text{Cl}_2$ ); 95% *ee*,  $[\alpha]_D^{30} = -35.1$  (*c* 1.30,  $\text{CHCl}_3$ );  $^1\text{H NMR}$  (400 MHz,  $\text{CDCl}_3$ ):  $\delta$  6.94 (d,  $J = 9.0$  Hz, 1H), 6.82 (dd,  $J = 9.0, 2.8$  Hz, 1H), 6.60 (d,  $J = 2.8$  Hz, 1H), 5.76 (d,  $J = 7.5$  Hz, 1H), 5.12 (d,  $J = 3.8$  Hz, 1H), 3.76 (s, 3H), 3.58 (dd,  $J = 18.1, 7.7$  Hz, 1H), 2.95 (dd,  $J = 18.1, 3.9$  Hz, 1H), 2.23 (s, 3H);  $^{13}\text{C NMR}$  (100 MHz,  $\text{CDCl}_3$ ):  $\delta$  206.9, 160.3, 151.8, 126.4, 113.0, 112.4, 103.8, 55.6, 53.0, 46.3, 31.1; HRMS (ESI):  $m/z$  calculated for  $\text{C}_{11}\text{H}_{13}\text{NNaO}_5\text{S}$   $[\text{M}+\text{Na}]^+$  294.0407, found: 294.0409; HPLC (Chiralcel IC column, hexane/*i*PrOH = 70/30, 0.8 mL/min, 220 nm):  $t_1 = 10.3$  min (major, *S*),  $t_2 = 12.3$  min.

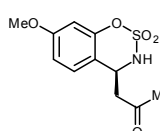

**2g:** Colorless oil;  $R_f = 0.23$  ( $\text{CH}_2\text{Cl}_2$ ); 96% *ee*,  $[\alpha]_D^{30} = -27.3$  (*c* 1.17,  $\text{CHCl}_3$ );  $^1\text{H NMR}$  (400 MHz,  $\text{CDCl}_3$ ):  $\delta$  6.94 (d,  $J = 8.6$  Hz, 1H), 6.66 (dd,  $J = 8.6, 2.1$  Hz, 1H), 6.45 (s, 1H), 5.06 (dd,  $J = 7.7, 3.8$  Hz, 1H), 4.83 (s, 1H), 3.75 (s, 3H), 3.47 (dd,  $J = 17.7, 8.0$  Hz, 1H), 2.88 (dd,  $J = 17.8, 3.7$  Hz, 1H), 2.19 (s, 3H);  $^{13}\text{C NMR}$  (100 MHz,  $\text{CDCl}_3$ ):  $\delta$  206.9, 160.3, 151.8, 126.4, 113.0, 112.4, 103.8, 55.6, 53.0, 46.3, 31.1; HRMS (ESI):  $m/z$  calculated for  $\text{C}_{11}\text{H}_{13}\text{NNaO}_5\text{S}$   $[\text{M}+\text{Na}]^+$  294.0407, found: 294.0410; HPLC (Chiralcel IC column, hexane/*i*PrOH = 70/30, 0.8 mL/min, 220 nm):  $t_1 = 15.2$  min (major, *S*),  $t_2 = 21.7$  min.

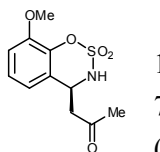

**2h:** White solid; mp 116.2-117.0°C;  $R_f = 0.21$  ( $\text{CH}_2\text{Cl}_2$ ); 95% *ee*,  $[\alpha]_D^{31} = -24.3$  (*c* 1.44,  $\text{CHCl}_3$ );  $^1\text{H NMR}$  (400 MHz,  $\text{CDCl}_3$ ):  $\delta$  7.08 (t,  $J = 8.1$  Hz, 1H), 6.87 (d,  $J = 7.9$  Hz, 1H), 6.66 (d,  $J = 7.9$  Hz, 1H), 5.84 (s, 1H), 5.16 (s, 1H), 3.84 (s, 3H), 3.59 (dd,  $J = 18.1, 7.6$  Hz, 1H), 2.94 (dd,  $J = 18.1, 3.9$  Hz, 1H), 2.22 (s, 3H);  $^{13}\text{C NMR}$  (100 MHz,  $\text{CDCl}_3$ ):  $\delta$  206.7, 156.7, 144.8, 122.2, 119.9, 114.5, 111.1, 55.7, 53.4, 46.5, 31.0; HRMS (ESI):  $m/z$  calculated for  $\text{C}_{11}\text{H}_{13}\text{NNaO}_5\text{S}$   $[\text{M}+\text{Na}]^+$  294.0407, found: 294.0411; HPLC (Chiralcel IC column, hexane/*i*PrOH = 70/30, 0.8 mL/min, 220 nm):  $t_1 = 15.0$  min (major, *S*),  $t_2 = 26.6$  min.

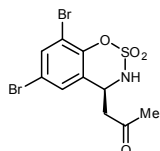

**2i:** White solid; mp 133.9-135.1°C;  $R_f = 0.28$  ( $\text{CH}_2\text{Cl}_2$ ); 97% *ee*,  $[\alpha]_D^{31} = -12.6$  (*c* 1.00,  $\text{CHCl}_3$ );  $^1\text{H NMR}$  (400 MHz,  $\text{CDCl}_3$ ):  $\delta$  7.69-7.67 (m, 1H), 7.19 (s, 1H), 5.98 (s, 1H), 5.15 (s, 1H), 3.64-3.56 (m, 1H), 2.99 (d,  $J = 18.4$  Hz, 1H), 2.26-2.25 (m, 3H);  $^{13}\text{C NMR}$  (100 MHz,  $\text{CDCl}_3$ ):  $\delta$  206.2, 147.3, 135.8, 127.7, 124.8, 117.9,

113.9, 53.1, 46.2, 30.9; HRMS (ESI):  $m/z$  calculated for  $C_{10}H_9Br_2NNaO_4S$   $[M+Na]^+$  419.8511, found: 419.8514; HPLC (Chiralcel IC column, hexane/iPrOH = 70/30, 0.8 mL/min, 220 nm):  $t_1$  = 6.3 min (major, *S*),  $t_2$  = 7.9 min.

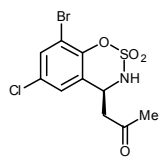

**2j:** White solid; mp 121.7-122.2°C;  $R_f$  = 0.26 ( $CH_2Cl_2$ ); 96% *ee*,  $[\alpha]_D^{32}$  = -6.1 (*c* 1.12,  $CHCl_3$ );  $^1H$  NMR (400 MHz,  $CDCl_3$ ):  $\delta$  7.54 (d,  $J$  = 2.1 Hz, 1H), 7.05 (d,  $J$  = 1.8 Hz, 1H), 5.95 (s, 1H), 5.15 (s, 1H), 3.60 (dd,  $J$  = 18.4, 7.2 Hz, 1H), 3.00 (dd,  $J$  = 18.4, 4.0 Hz, 1H), 2.26 (s, 3H);  $^{13}C$  NMR (100 MHz,  $CDCl_3$ ):  $\delta$  206.2, 146.8, 133.1, 130.8, 124.9, 124.4, 113.5, 53.1, 46.3, 30.8; HRMS (ESI):  $m/z$  calculated for  $C_{10}H_9BrClNNaO_4S$   $[M+Na]^+$  375.9016, found: 375.9015; HPLC (Chiralcel IC column, hexane/iPrOH = 70/30, 0.8 mL/min, 220 nm):  $t_1$  = 6.1 min (major, *S*),  $t_2$  = 7.8 min.

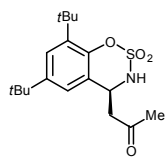

**2k:** White solid; mp 143.3-144.5°C;  $R_f$  = 0.29 ( $CH_2Cl_2$ ); 93% *ee*,  $[\alpha]_D^{31}$  = -37.3 (*c* 1.00,  $CHCl_3$ );  $^1H$  NMR (400 MHz,  $CDCl_3$ ):  $\delta$  7.33 (d,  $J$  = 2.2 Hz, 1H), 6.94 (d,  $J$  = 2.0 Hz, 1H), 5.74 (s, 1H), 5.15 (dd,  $J$  = 8.4, 3.8 Hz, 1H), 3.61 (dd,  $J$  = 17.9, 8.5 Hz, 1H), 2.92 (dd,  $J$  = 17.9, 3.9 Hz, 1H), 2.24 (s, 3H), 1.40 (s, 9H), 1.28 (s, 9H);  $^{13}C$  NMR (100 MHz,  $CDCl_3$ ):  $\delta$  206.8, 148.0, 147.6, 139.4, 124.3, 121.8, 120.7, 53.6, 47.4, 35.1, 34.6, 31.3, 30.9, 30.0; HRMS (ESI):  $m/z$  calculated for  $C_{18}H_{27}NNaO_4S$   $[M+Na]^+$  376.1553, found: 376.1557; HPLC (Chiralcel IC column, hexane/iPrOH = 70/30, 0.8 mL/min, 220 nm):  $t_1$  = 5.8 min (major, *S*),  $t_2$  = 6.4 min.

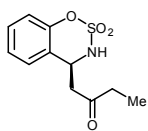

**4a:** Known compound<sup>2</sup>;  $R_f$  = 0.34 ( $CH_2Cl_2$ ); 96% *ee*,  $[\alpha]_D^{31}$  = -26.7 (*c* 0.97,  $CHCl_3$ );  $^1H$  NMR (400 MHz,  $CDCl_3$ ):  $\delta$  7.33-7.29 (m, 1H), 7.17 (td,  $J$  = 7.6, 1.0 Hz, 1H), 7.11-7.09 (m, 1H), 7.03 (dd,  $J$  = 8.2, 0.8 Hz, 1H), 5.78 (d,  $J$  = 4.3 Hz, 1H), 5.19 (d,  $J$  = 3.4 Hz, 1H), 3.61 (dd,  $J$  = 17.9, 7.5 Hz, 1H), 2.93 (dd,  $J$  = 17.9, 3.9 Hz, 1H), 2.58-2.46 (m, 2H), 1.06 (t,  $J$  = 7.3 Hz, 3H);  $^{13}C$  NMR (100 MHz,  $CDCl_3$ ):  $\delta$  209.5, 151.2, 129.6, 125.7, 125.4, 121.4, 119.2, 53.6, 45.0, 37.2, 7.4; HPLC (Chiralcel IC column, hexane/iPrOH = 70/30, 0.8 mL/min, 220 nm):  $t_1$  = 9.5 min (major, *S*),  $t_2$  = 15.9 min.

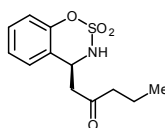

**4b:** Known compound<sup>2</sup>;  $R_f$  = 0.18 ( $CH_2Cl_2$ ); 95% *ee*,  $[\alpha]_D^{31}$  = -21.3 (*c* 0.97,  $CHCl_3$ );  $^1H$  NMR (400 MHz,  $CDCl_3$ ):  $\delta$  7.32-7.27 (m, 1H), 7.16 (td,  $J$  = 7.5, 0.8 Hz, 1H), 7.10 (d,  $J$  = 7.5 Hz, 1H), 7.00 (d,  $J$  = 8.2 Hz, 1H), 5.93 (d,  $J$  = 8.0 Hz, 1H), 5.18 (td,  $J$  = 7.8, 3.9 Hz, 1H), 3.58 (dd,  $J$  = 17.9, 7.7 Hz, 1H), 2.91 (dd,  $J$  = 17.9, 3.9 Hz, 1H), 2.48-2.43 (m, 2H), 1.59 (dd,  $J$  = 14.7, 7.4 Hz, 2H), 0.89 (t,  $J$  = 7.4 Hz, 3H);  $^{13}C$  NMR (100 MHz,  $CDCl_3$ ):  $\delta$  209.3, 151.1, 129.5, 125.8, 125.4, 121.4, 119.0, 53.4, 45.7, 45.5, 16.8, 13.5; HPLC (Chiralcel IC column, hexane/iPrOH = 70/30, 0.8 mL/min, 220 nm):  $t_1$  = 8.3 min (major, *S*),  $t_2$  = 13.3 min.

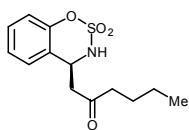

**4c:** White solid; mp 43.1-44.3°C;  $R_f$  = 0.56 ( $CH_2Cl_2$ ); 97% *ee*,  $[\alpha]_D^{31}$  = -31.4 (*c* 0.92,  $CHCl_3$ );  $^1H$  NMR (400 MHz,  $CDCl_3$ ):  $\delta$  7.32-7.29 (m, 1H), 7.16 (t,  $J$  = 7.1 Hz, 1H), 7.10 (d,  $J$  = 7.6 Hz, 1H), 7.01 (d,  $J$  = 8.2 Hz, 1H), 5.90 (s, 1H), 5.18 (s, 1H), 3.59 (dd,  $J$  = 17.9, 7.6 Hz, 1H), 2.91 (dd,  $J$  = 17.9, 3.9 Hz, 1H), 2.54-2.41 (m, 2H), 1.58-1.50 (m, 2H), 1.33-1.24 (m, 2H), 0.88 (t,  $J$  = 7.3 Hz, 3H);  $^{13}C$  NMR (100 MHz,  $CDCl_3$ ):  $\delta$  209.4, 151.1, 129.5, 125.8, 125.4, 121.4, 119.0, 53.4, 45.5, 43.6, 25.4, 22.1, 13.7; HRMS (ESI):  $m/z$  calculated for  $C_{13}H_{17}NNaO_4S$   $[M+Na]^+$  306.0771, found: 306.0773; HPLC (Chiralcel IC column, hexane/iPrOH = 70/30, 0.8 mL/min, 220 nm):  $t_1$  = 7.3 min (major, *S*),  $t_2$  = 12.4 min.

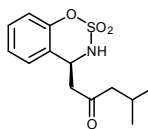

**4d:** Yellow solid; mp 36.3-37.5°C;  $R_f$  = 0.47 ( $CH_2Cl_2$ ); 96% *ee*,  $[\alpha]_D^{32}$  = -31.4 (*c*

0.97, CHCl<sub>3</sub>); <sup>1</sup>H NMR (400 MHz, CDCl<sub>3</sub>): δ 7.29 (t, *J* = 7.7 Hz, 1H), 7.18-7.14 (m, 1H), 7.10 (d, *J* = 7.5 Hz, 1H), 7.00 (d, *J* = 8.2 Hz, 1H), 5.96 (s, 1H), 5.18 (td, *J* = 7.8, 4.0 Hz, 1H), 3.58 (dd, *J* = 18.0, 7.6 Hz, 1H), 2.88 (dd, *J* = 18.0, 3.9 Hz, 1H), 2.35 (d, *J* = 7.0 Hz, 2H), 2.17-2.07 (m, 1H), 0.89 (dd, *J* = 6.6, 2.5 Hz, 6H); <sup>13</sup>C NMR (100 MHz, CDCl<sub>3</sub>): δ 209.1, 151.1, 129.5, 126.9, 125.3, 121.5, 119.0, 53.3, 52.7, 46.0, 24.4, 22.4, 22.3; HRMS (ESI): *m/z* calculated for C<sub>13</sub>H<sub>17</sub>NNaO<sub>4</sub>S [M+Na]<sup>+</sup> 306.0771, found: 306.0774; HPLC (Chiralcel IC column, hexane/iPrOH = 70/30, 0.8 mL/min, 220 nm): *t*<sub>1</sub> = 6.4 min (major, *S*), *t*<sub>2</sub> = 8.8 min.

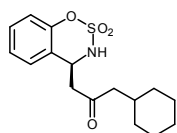

**4e:** White solid; mp 76.5-77.8°C; *R*<sub>f</sub> = 0.32 (PE/EtOAc, 5:1); 87% *ee*, [α]<sup>32</sup><sub>D</sub> = -38.1 (*c* 1.25, CHCl<sub>3</sub>); <sup>1</sup>H NMR (400 MHz, CDCl<sub>3</sub>): δ 7.33-7.28 (m, 1H), 7.16 (td, *J* = 7.5, 1.0 Hz, 1H), 7.10-7.08 (m, 1H), 7.02 (dd, *J* = 8.3 Hz, 1.0 Hz, 1H), 5.87 (d, *J* = 8.0 Hz, 1H), 5.20-5.15 (m, 1H), 3.59 (dd, *J* = 18.0, 7.3 Hz, 1H), 2.89 (dd, *J* = 18.0, 3.9 Hz, 1H), 2.34 (d, *J* = 6.9 Hz, 2H), 1.87-1.76 (m, 1H), 1.68-1.60 (m, 4H), 1.30-1.06 (m, 4H), 0.96-0.82 (m, 2H); <sup>13</sup>C NMR (100 MHz, CDCl<sub>3</sub>): δ 209.1, 151.2, 129.6, 125.8, 125.3, 121.4, 119.2, 53.5, 51.6, 45.8, 33.8, 33.2, 33.1, 26.1, 26.02, 25.98; HRMS (ESI): *m/z* calculated for C<sub>16</sub>H<sub>21</sub>NNaO<sub>4</sub>S [M+Na]<sup>+</sup> 346.1089, found: 346.1088; HPLC (Chiralcel IC column, hexane/iPrOH = 70/30, 0.8 mL/min, 220 nm): *t*<sub>1</sub> = 7.2 min (major, *S*), *t*<sub>2</sub> = 9.3 min.

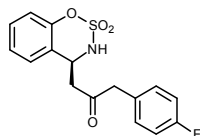

**4f:** White solid; mp 121.7-122.2°C; *R*<sub>f</sub> = 0.29 (PE/EtOAc, 3:1); 92% *ee*, [α]<sup>32</sup><sub>D</sub> = -13.8 (*c* 1.73, CHCl<sub>3</sub>); <sup>1</sup>H NMR (400 MHz, CDCl<sub>3</sub>): δ 7.32-7.28 (m, 1H), 7.15-7.11 (m, 2H), 7.09-7.07 (m, 1H), 7.06-7.00 (m, 3H), 6.90 (d, *J* = 8.0 Hz, 7.7 Hz), 5.66 (d, *J* = 8.1 Hz, 1H), 5.14 (td, *J* = 7.8, 3.9 Hz, 1H), 3.74 (s, 2H), 3.66 (dd, *J* = 18.0, 7.5 Hz, 1H), 2.92 (dd, *J* = 18.0, 3.9 Hz, 1H); <sup>13</sup>C NMR (100 MHz, CDCl<sub>3</sub>): δ 206.1, 162.2 (d, <sup>1</sup>*J*<sub>F-C</sub> = 245.0 Hz), 151.1, 131.1 (d, <sup>3</sup>*J*<sub>F-C</sub> = 8.0 Hz), 129.7, 128.38 (d, <sup>4</sup>*J*<sub>F-C</sub> = 3.3 Hz), 125.6, 125.4, 121.0, 119.1, 115.9 (d, <sup>2</sup>*J*<sub>F-C</sub> = 21.4 Hz), 53.5, 50.0, 44.6; HRMS (ESI): *m/z* calculated for C<sub>16</sub>H<sub>14</sub>FNNaO<sub>4</sub>S [M+Na]<sup>+</sup> 358.0525, found: 358.0510; HPLC (Chiralcel IC column, hexane/iPrOH = 70/30, 0.8 mL/min, 220 nm): *t*<sub>1</sub> = 8.8 min (major, *S*), *t*<sub>2</sub> = 12.0 min.

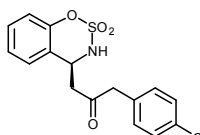

**4g:** White solid; mp 121.7-122.2°C; *R*<sub>f</sub> = 0.29 (PE/EtOAc, 3:1); 94% *ee*, [α]<sup>32</sup><sub>D</sub> = -6.8 (*c* 1.66, CHCl<sub>3</sub>); <sup>1</sup>H NMR (400 MHz, CDCl<sub>3</sub>): δ 7.31-7.28 (m, 3H), 7.12-7.08 (m, 3H), 7.01-6.99 (m, 1H), 6.91 (d, *J* = 7.7 Hz, 1H), 5.69 (s, 1H), 5.14 (d, *J* = 3.5 Hz, 1H), 3.73 (s, 2H), 3.66 (dd, *J* = 18.0, 7.7 Hz, 1H), 2.92 (dd, *J* = 18.0, 3.9 Hz, 1H); <sup>13</sup>C NMR (100 MHz, CDCl<sub>3</sub>): δ 205.9, 151.1, 133.5, 131.1, 130.8, 129.7, 129.1, 125.7, 125.4, 121.0, 119.1, 53.5, 50.1, 44.9; HRMS (ESI): *m/z* calculated for C<sub>16</sub>H<sub>14</sub>ClNNaO<sub>4</sub>S [M+Na]<sup>+</sup> 374.0230, found: 374.0198; HPLC (Chiralcel IC column, hexane/iPrOH = 70/30, 0.8 mL/min, 220 nm): *t*<sub>1</sub> = 9.3 min (major, *S*), *t*<sub>2</sub> = 12.3 min.

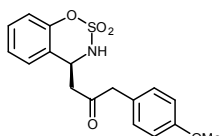

**4h:** White solid; mp 121.7-122.2°C; Yellow solid; mp 102.7-103.8°C; *R*<sub>f</sub> = 0.43 (CH<sub>2</sub>Cl<sub>2</sub>); 94% *ee*, [α]<sup>31</sup><sub>D</sub> = 6.1 (*c* 1.73, CHCl<sub>3</sub>); <sup>1</sup>H NMR (400 MHz, CDCl<sub>3</sub>): δ 7.30-7.25 (m, 1H), 7.09-7.04 (m, 3H), 6.99 (d, *J* = 8.3 Hz, 1H), 6.88-6.84 (m, 3H), 5.79 (s, 1H), 5.10 (d, *J* = 3.4 Hz, 1H), 3.80 (s, 3H), 3.68 (s, 2H), 3.63 (dd, *J* = 18.1, 7.2 Hz, 1H), 2.90 (dd, *J* = 18.1, 3.9 Hz, 1H); <sup>13</sup>C NMR (100 MHz, CDCl<sub>3</sub>): δ 207.0, 158.9, 151.1, 130.5, 129.5, 125.7, 125.3, 124.7, 121.1, 118.9, 55.2, 53.4, 50.0, 44.1; HRMS (ESI): *m/z* calculated for C<sub>17</sub>H<sub>17</sub>NNaO<sub>5</sub>S [M+Na]<sup>+</sup> 370.0720, found: 370.0719; HPLC (Chiralcel IC column, hexane/iPrOH = 70/30, 0.8 mL/min, 220 nm): *t*<sub>1</sub> = 16.3 min (major, *S*), *t*<sub>2</sub> = 37.5 min.

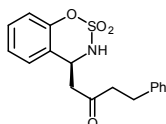

**4i:** White solid; mp 36.3-37.5°C; *R*<sub>f</sub> = 0.57 (CH<sub>2</sub>Cl<sub>2</sub>); 96% *ee*, [α]<sup>31</sup><sub>D</sub> = -23.4 (*c* 0.98, CHCl<sub>3</sub>); <sup>1</sup>H NMR (400 MHz, CDCl<sub>3</sub>): δ 7.31-7.25 (m, 3H), 7.19 (t, *J* = 7.3

Hz, 1H), 7.15-7.11 (m, 3H), 7.00 (d,  $J = 8.4$  Hz, 1H), 5.78 (s, 1H), 5.16 (d,  $J = 3.6$  Hz, 1H), 3.56 (dd,  $J = 18.0, 7.7$  Hz, 1H), 2.90-2.79 (5, 2H);  $^{13}\text{C}$  NMR (100 MHz,  $\text{CDCl}_3$ ):  $\delta$  208.1, 151.1, 140.2, 129.6, 128.6, 128.2, 126.3, 125.8, 125.4, 121.2, 119.1, 53.3, 45.9, 45.1, 29.3; HRMS (ESI):  $m/z$  calculated for  $\text{C}_{17}\text{H}_{17}\text{NNaO}_4\text{S}$   $[\text{M}+\text{Na}]^+$  354.0771, found: 354.0771; HPLC (Chiralcel IC column, hexane/*i*PrOH = 70/30, 0.8 mL/min, 220 nm):  $t_1 = 9.9$  min (major, *S*),  $t_2 = 15.9$  min.

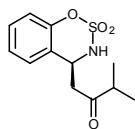

**4j:** Known compound<sup>2</sup>;  $R_f = 0.49$  ( $\text{CH}_2\text{Cl}_2$ ); 96% ee,  $[\alpha]_{\text{D}}^{20} = -51.2$  ( $c$  1.44 in  $\text{CHCl}_3$ );  $^1\text{H}$  NMR (400 MHz,  $\text{CDCl}_3$ )  $\delta$  7.30 (t,  $J = 7.8$  Hz, 1H), 7.17 (t,  $J = 7.5$  Hz, 1H), 7.09 (m, 1H), 7.02 (dd,  $J = 8.2, 1.9$  Hz, 1H), 5.84 (d,  $J = 10.9$  Hz, 1H), 5.20 (s, 1H), 3.69 (dd,  $J = 18.1, 7.6$  Hz, 1H), 2.93 (dd,  $J = 18.1, 3.8$  Hz, 1H), 2.64 (m,  $J = 6.9$  Hz, 1H), 1.11 (t,  $J = 6.8$  Hz, 6H);  $^{13}\text{C}$  NMR (100 MHz,  $\text{CDCl}_3$ )  $\delta$  212.8, 151.1, 129.6, 125.8, 125.4, 121.4, 119.1, 53.5, 43.5, 41.6, 17.8, 17.7; HPLC (Chiralcel IC column, hexane/*i*PrOH = 70/30, 0.8 mL/min 220 nm):  $t_1 = 6.6$  min (major),  $t_2 = 10.7$  min (minor).

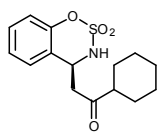

**4k:** Known compound<sup>2</sup>;  $R_f = 0.51$  ( $\text{CH}_2\text{Cl}_2$ ); 97% ee,  $[\alpha]_{\text{D}}^{32} = -19.4$  ( $c$  0.97,  $\text{CHCl}_3$ );  $^1\text{H}$  NMR (400 MHz,  $\text{CDCl}_3$ )  $\delta$  7.31-7.27 (m, 1H), 7.16 (td,  $J = 7.5, 1.0$  Hz, 1H), 7.08 (m, 1H), 7.00 (d,  $J = 8.3$  Hz, 1H), 5.92 (s, 1H), 5.19 (d,  $J = 3.7$  Hz, 1H), 3.67 (dd,  $J = 18.2, 7.6$  Hz, 1H), 2.91 (dd,  $J = 18.2, 3.9$  Hz, 1H), 2.38-2.34 (m, 1H), 1.87-1.81 (m, 2H), 1.79-1.76 (m, 2H), 1.68-1.65 (m, 1H), 1.39-1.29 (m, 2H), 1.25-1.15 (m, 3H);  $^{13}\text{C}$  NMR (100 MHz,  $\text{CDCl}_3$ ):  $\delta$  212.1, 151.2, 129.5, 125.8, 125.3, 121.5, 119.1, 53.4, 51.3, 43.6, 28.1, 28.0, 25.6, 25.4; HPLC (Chiralcel IC column, hexane/*i*PrOH = 70/30, 0.8 mL/min, 220 nm):  $t_1 = 6.9$  min (major, *S*),  $t_2 = 12.5$  min.

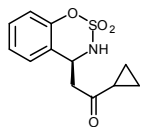

**4l:** Known compound<sup>2</sup>;  $R_f = 0.41$  ( $\text{CH}_2\text{Cl}_2$ ); 95% ee,  $[\alpha]_{\text{D}}^{30} = -43.92$  ( $c$  1.11 in  $\text{CHCl}_3$ );  $^1\text{H}$  NMR (400 MHz,  $\text{CDCl}_3$ )  $\delta$  7.32 – 7.28 (m, 1H), 7.19 – 7.12 (m, 2H), 7.01 (d,  $J = 8.2$  Hz, 1H), 5.96 (s, 1H), 5.17 (dd,  $J = 7.0, 3.8$  Hz, 1H), 3.72 (dd,  $J = 18.0, 7.2$  Hz, 1H), 3.11 (dd,  $J = 18.0, 3.9$  Hz, 1H), 2.02 – 1.96 (m, 1H), 1.13 – 1.07 (m, 1H), 1.04 – 0.93 (m, 3H);  $^{13}\text{C}$  NMR (100 MHz,  $\text{CDCl}_3$ )  $\delta$  209.0, 151.2, 129.5, 125.8, 125.3, 121.5, 119.0, 53.4, 45.7, 21.7, 11.7.5, 11.71; HPLC (Chiralcel IC column, hexane/*i*PrOH = 70/30, 0.8 mL/min 220 nm):  $t_1 = 9.7$  min (major),  $t_2 = 13.7$  min (minor).

#### 4. X-ray structure for compound 2c

The needle-like crystals of the compound **2c** were grown from its solution in dichloromethane and hexane, and one of them is suitable for X-ray diffraction analysis. The correctness of the X-ray data and the structure had been checked by using the CheckCIF utility on the submission Web site: <http://checkcif.iucr.org>.

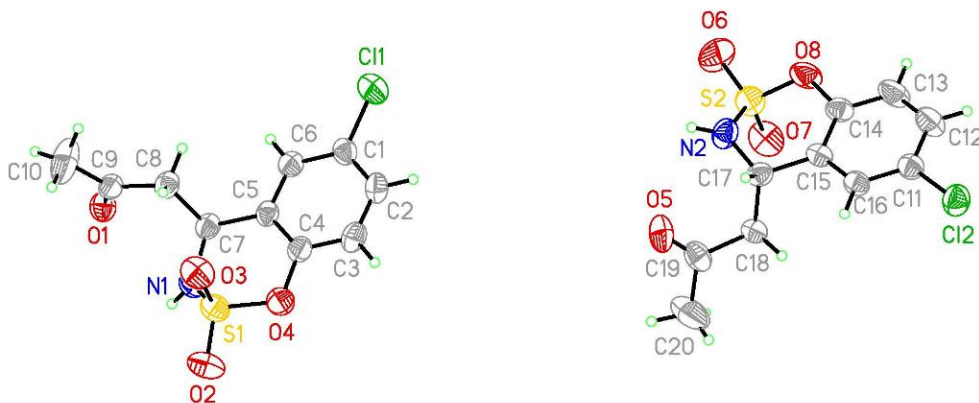

Copy of NMR

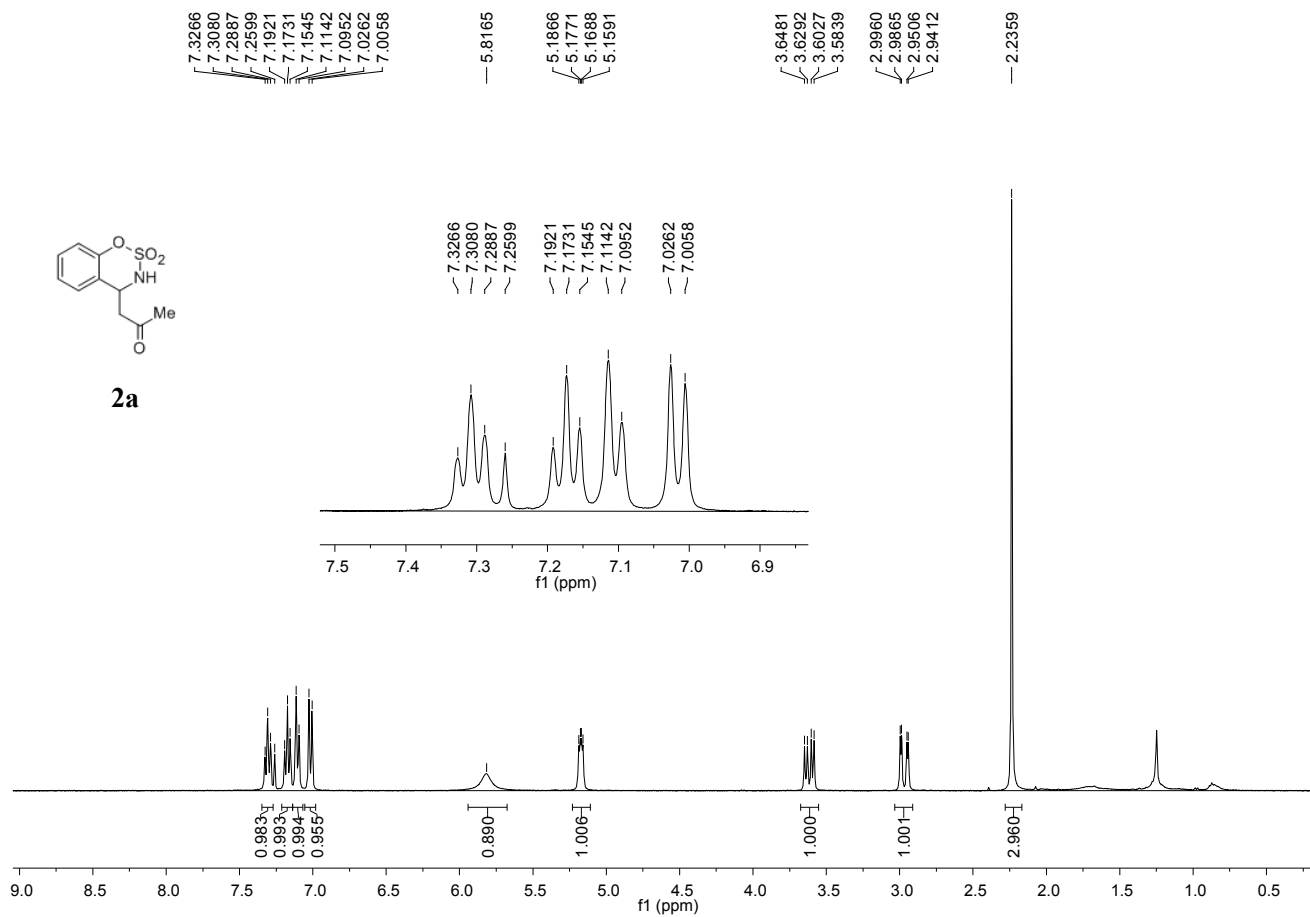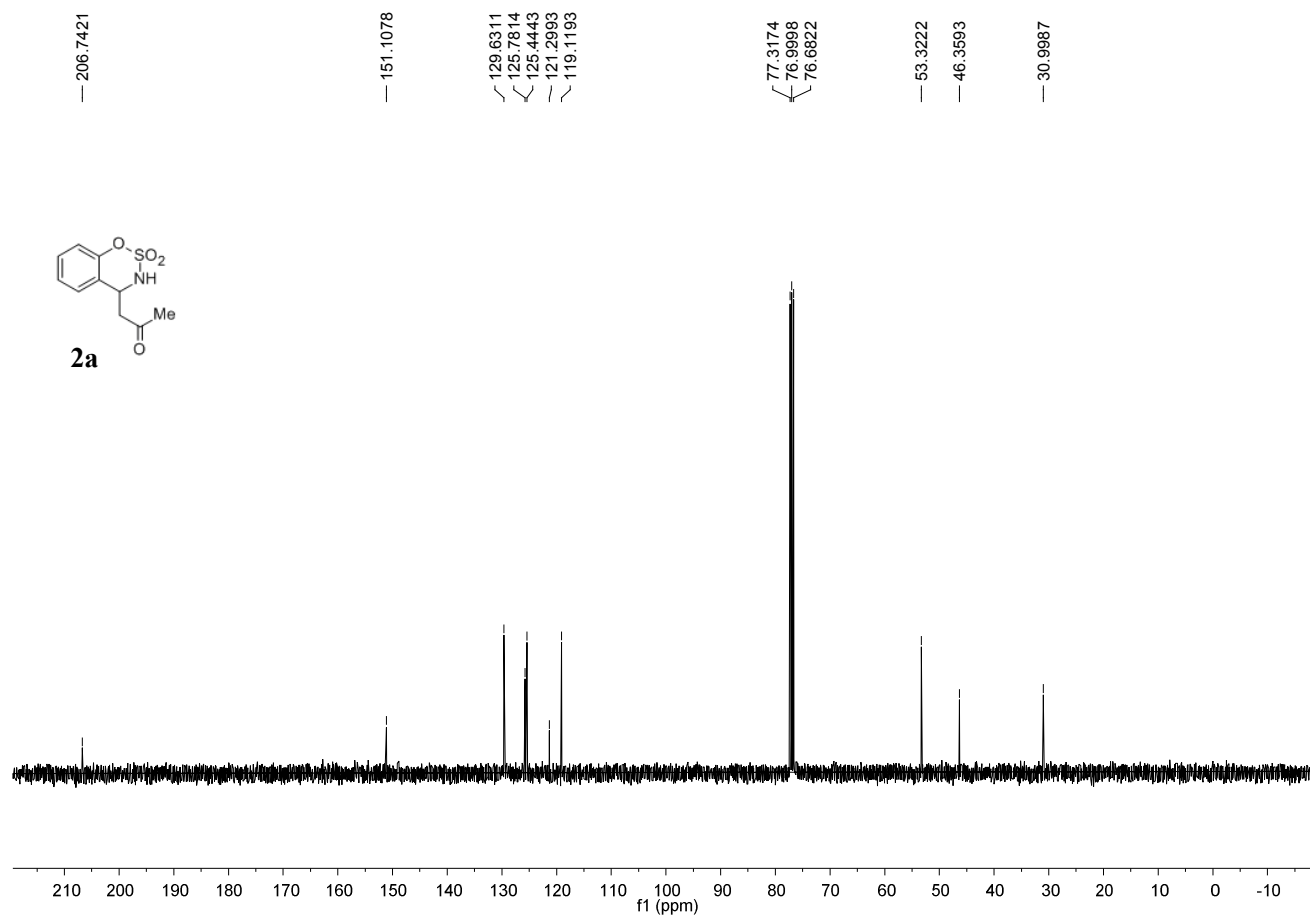

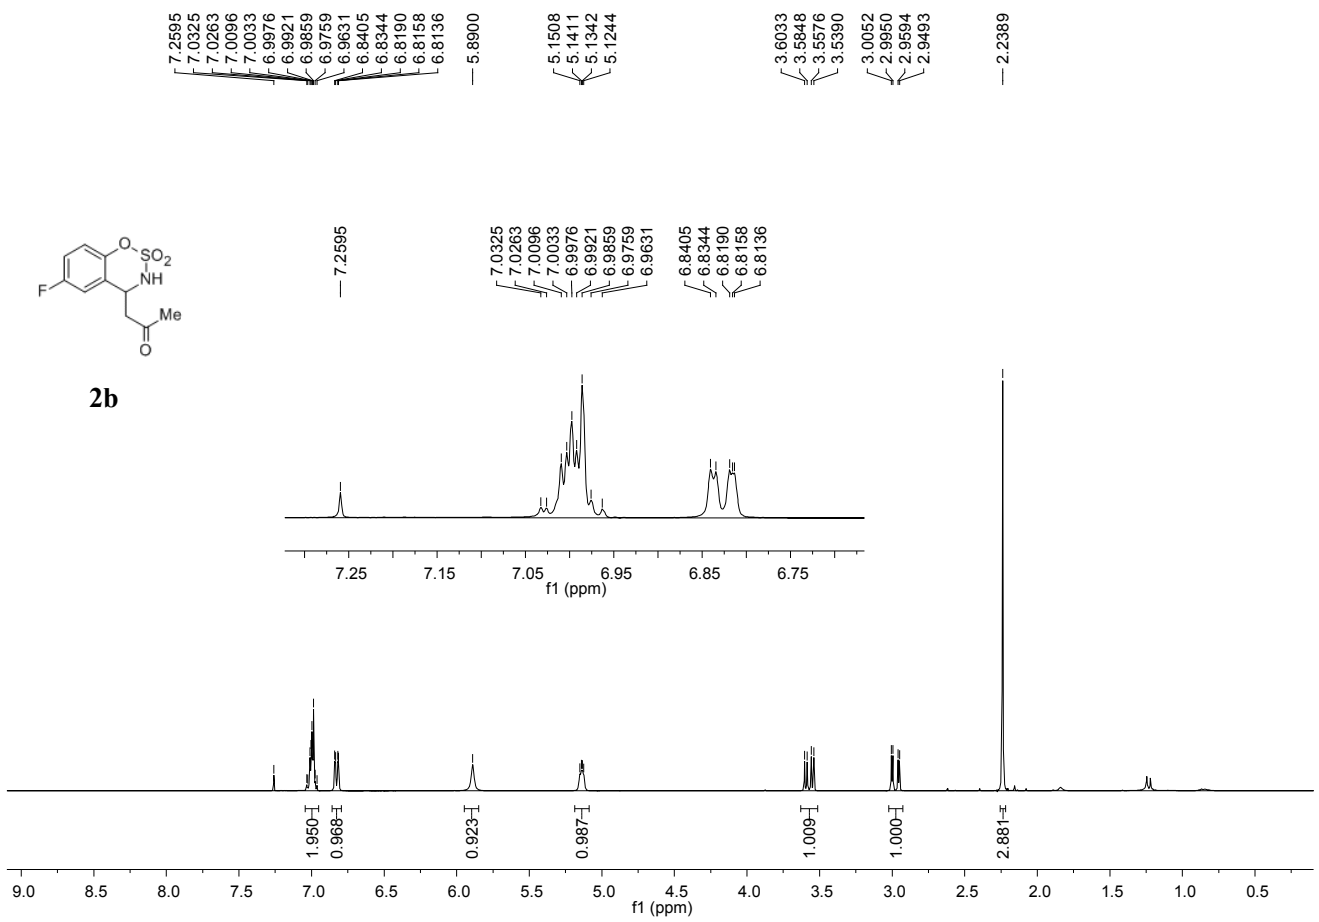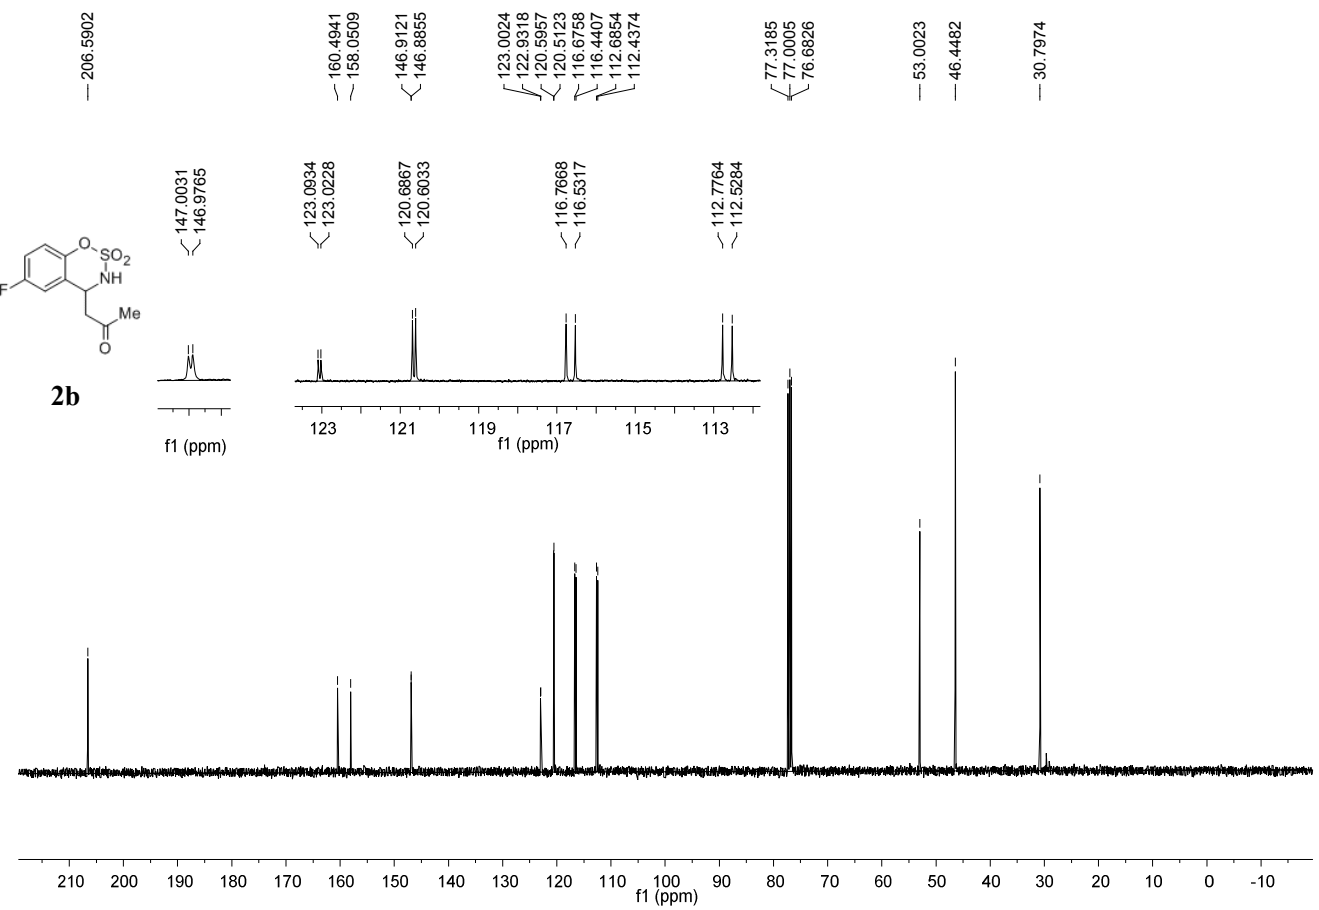



7.2964  
7.2952  
7.2903  
7.2892  
7.2744  
7.2732  
7.2684  
7.2672  
7.2603  
7.0981  
7.0967  
7.0923  
6.9941  
6.9721

5.7845  
5.7715

5.1403  
5.1312

3.6375  
3.6195  
3.5916  
3.5736

3.0146  
3.0047  
2.9687  
2.9588

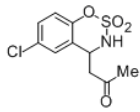

**2c**

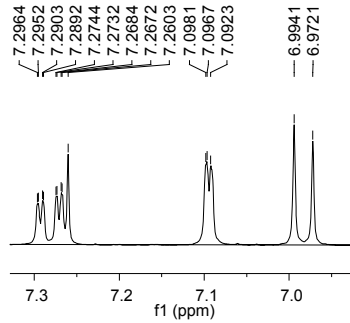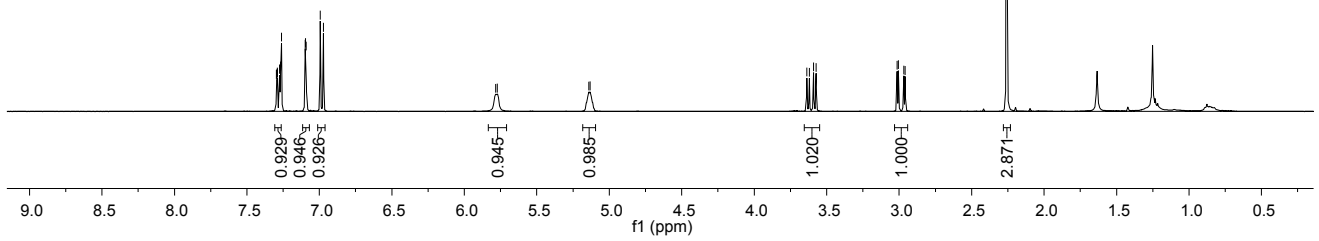

206.3216

149.6508

130.6870  
129.7381  
125.7274  
122.9273  
120.5400

77.3174  
76.9999  
76.6822

53.0578  
46.1499

30.9256

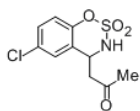

**2c**

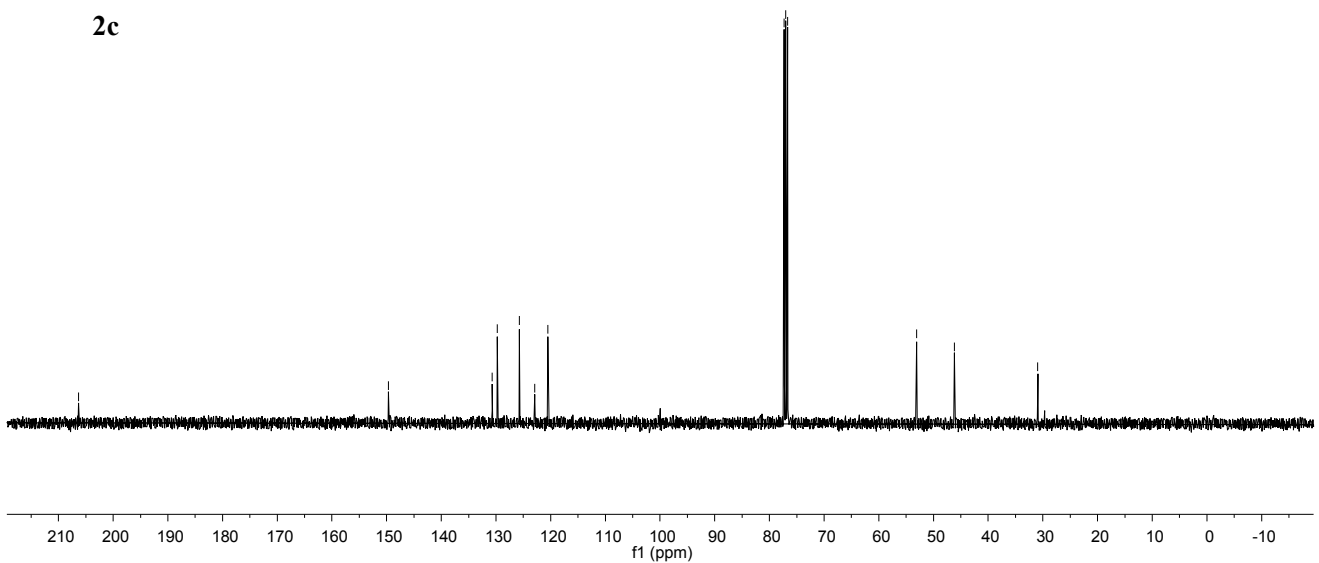

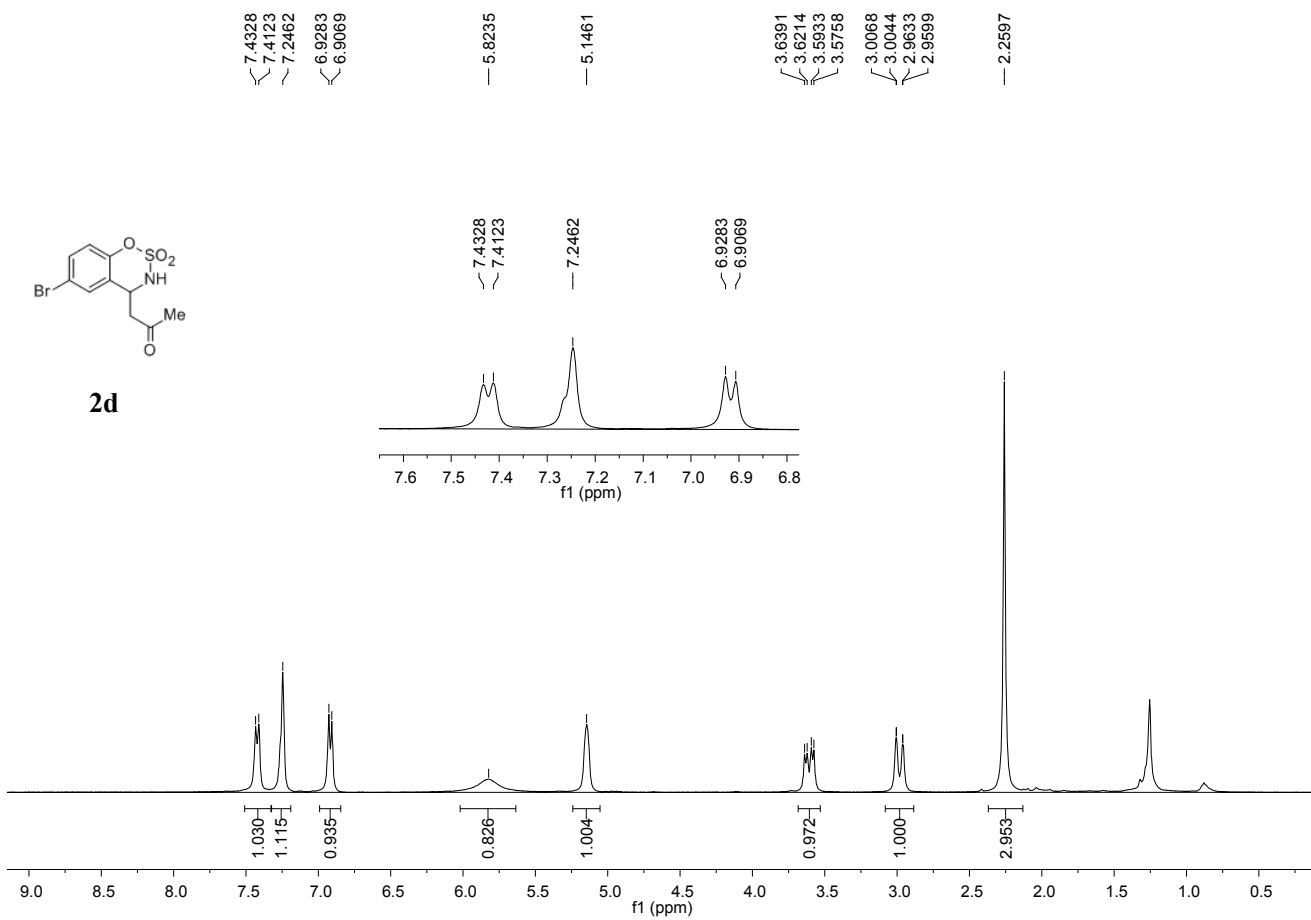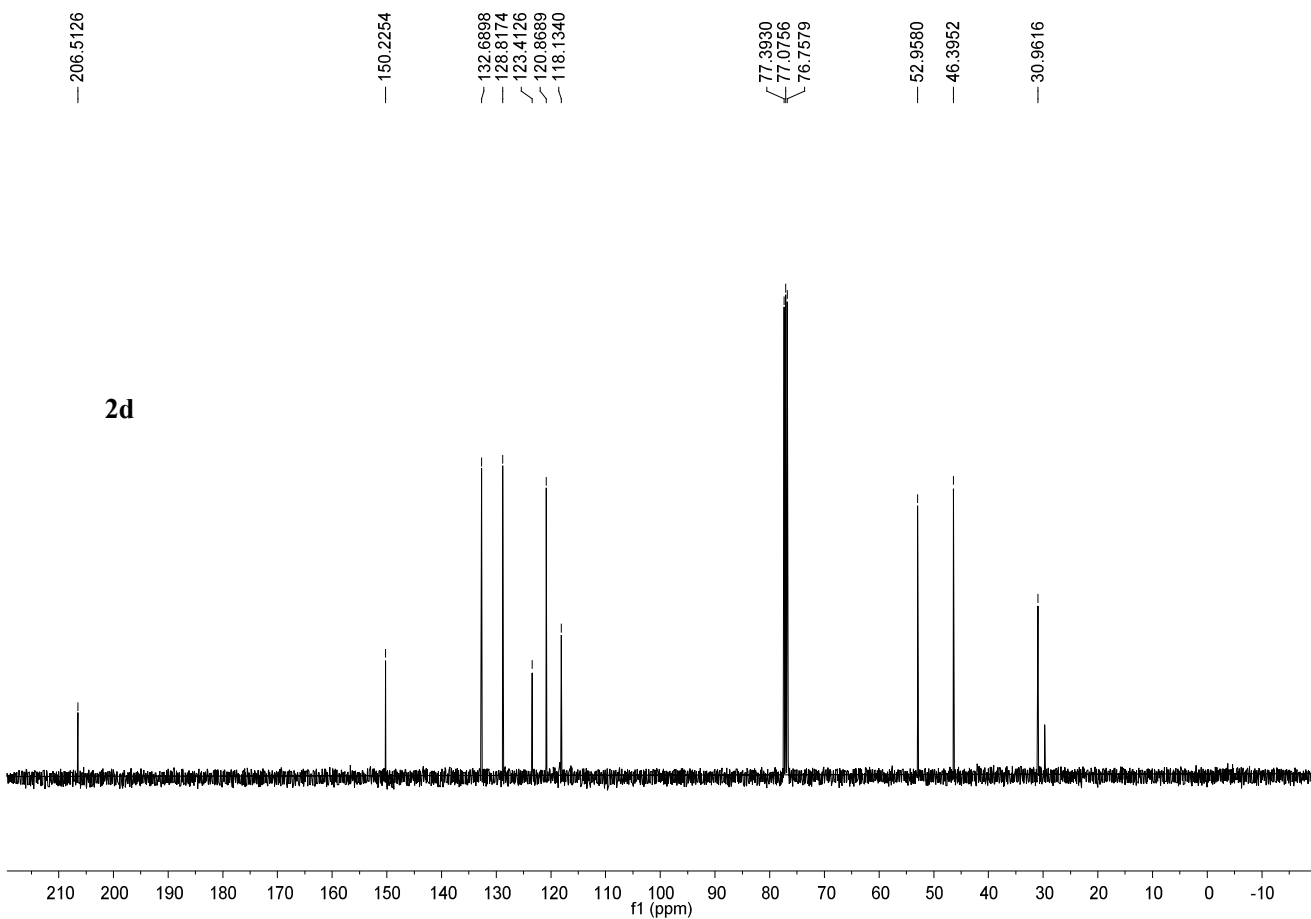

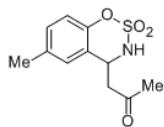

2e

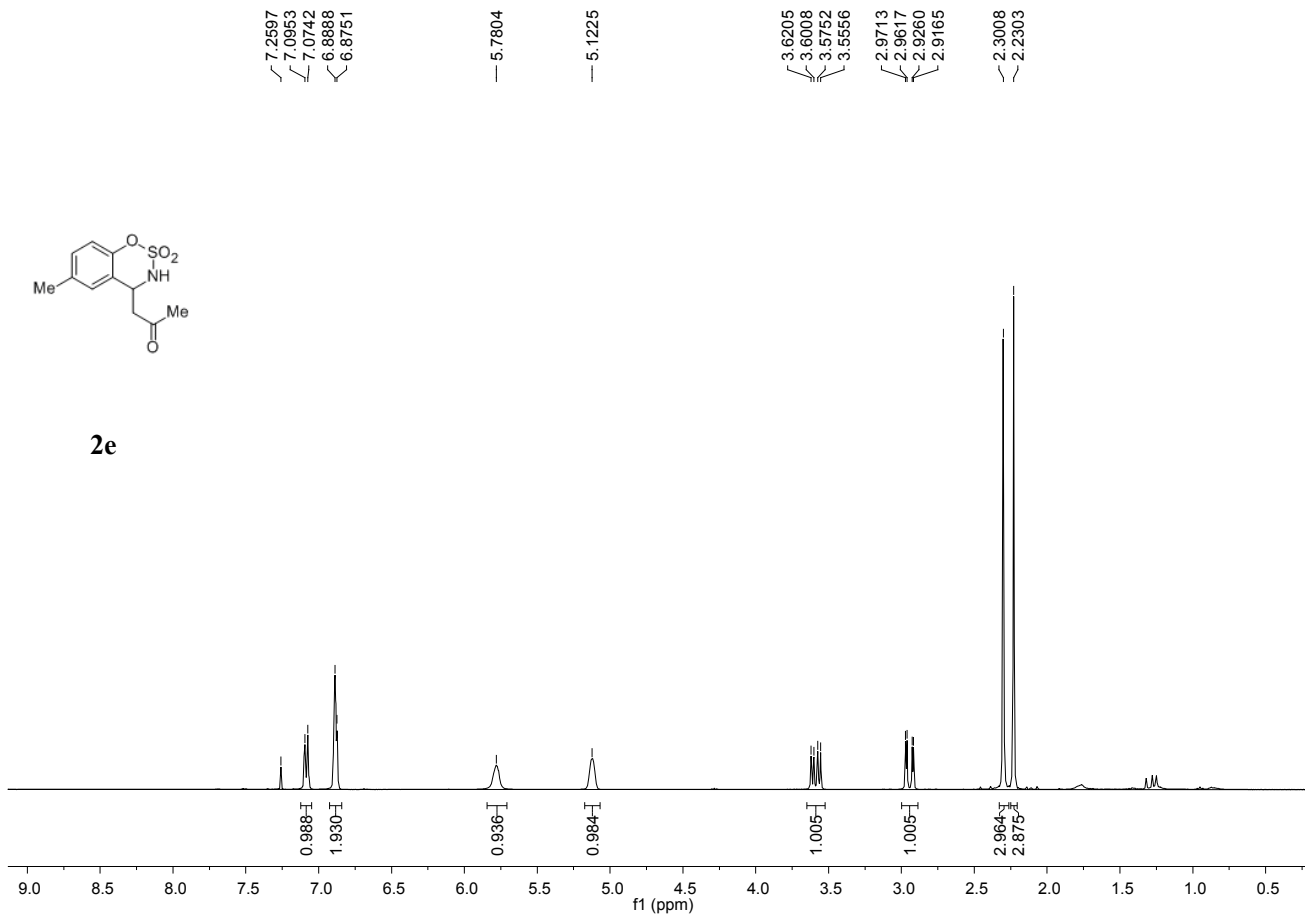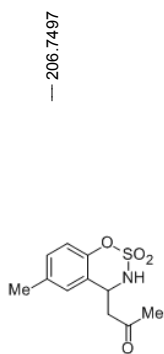

2e

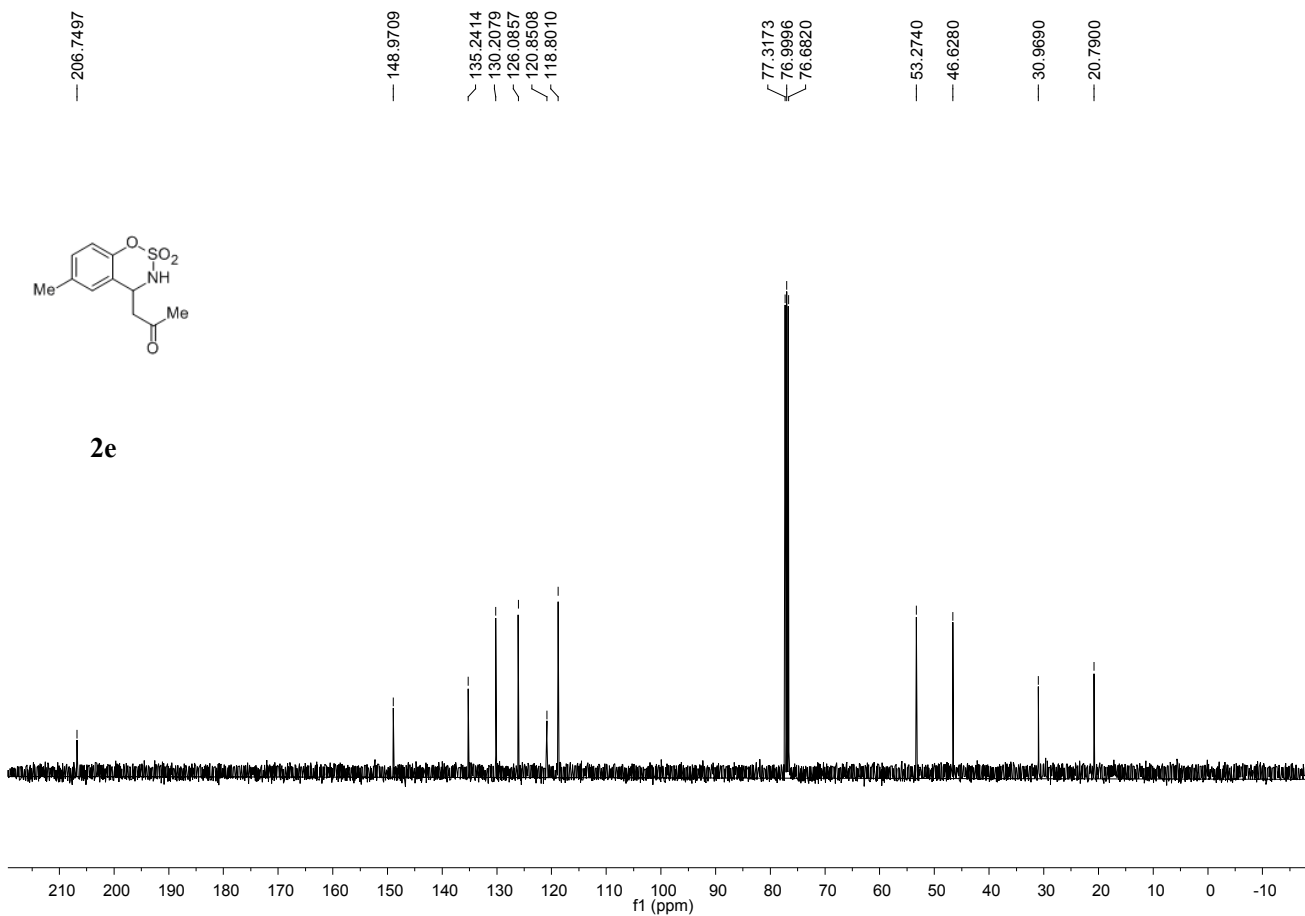

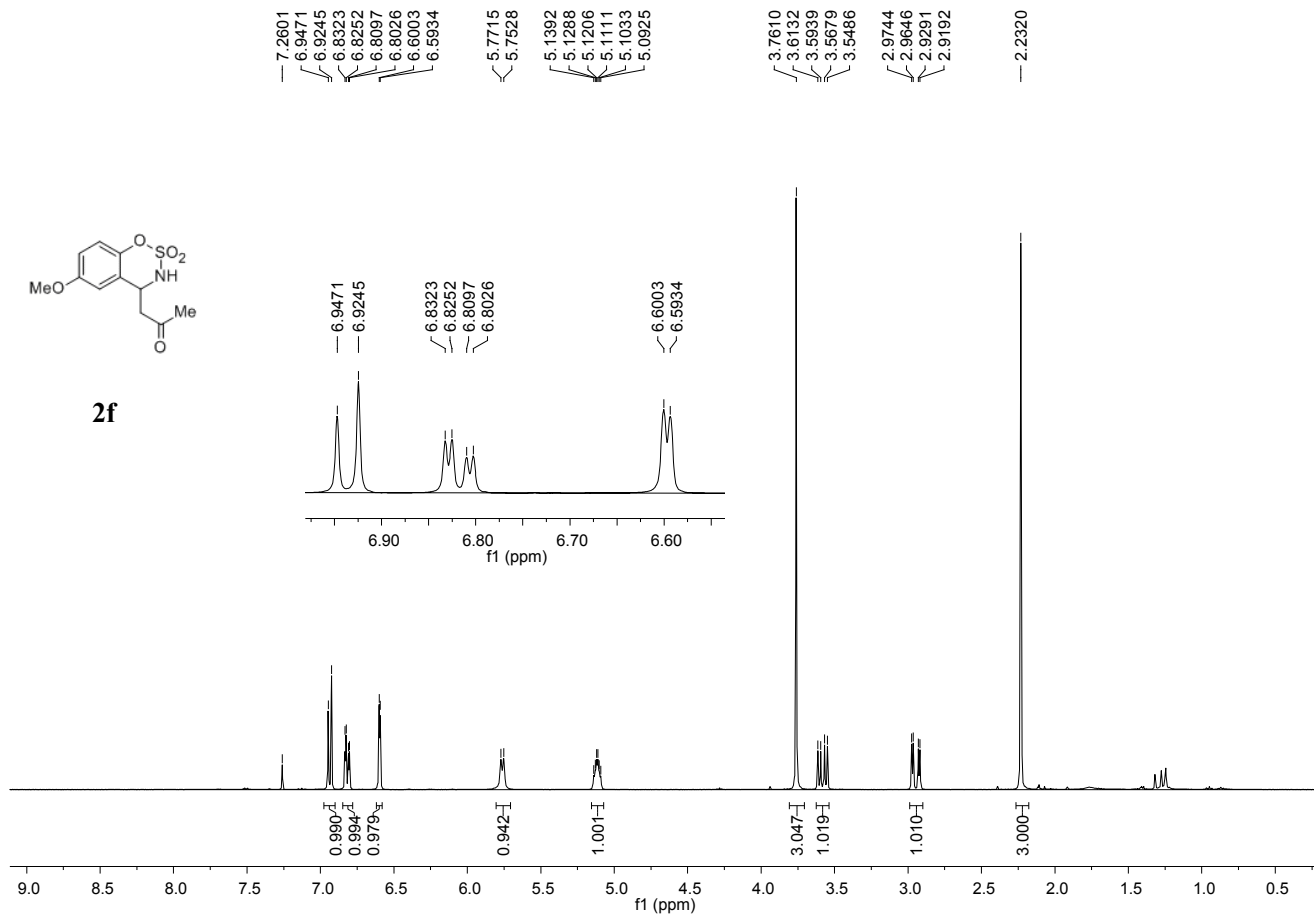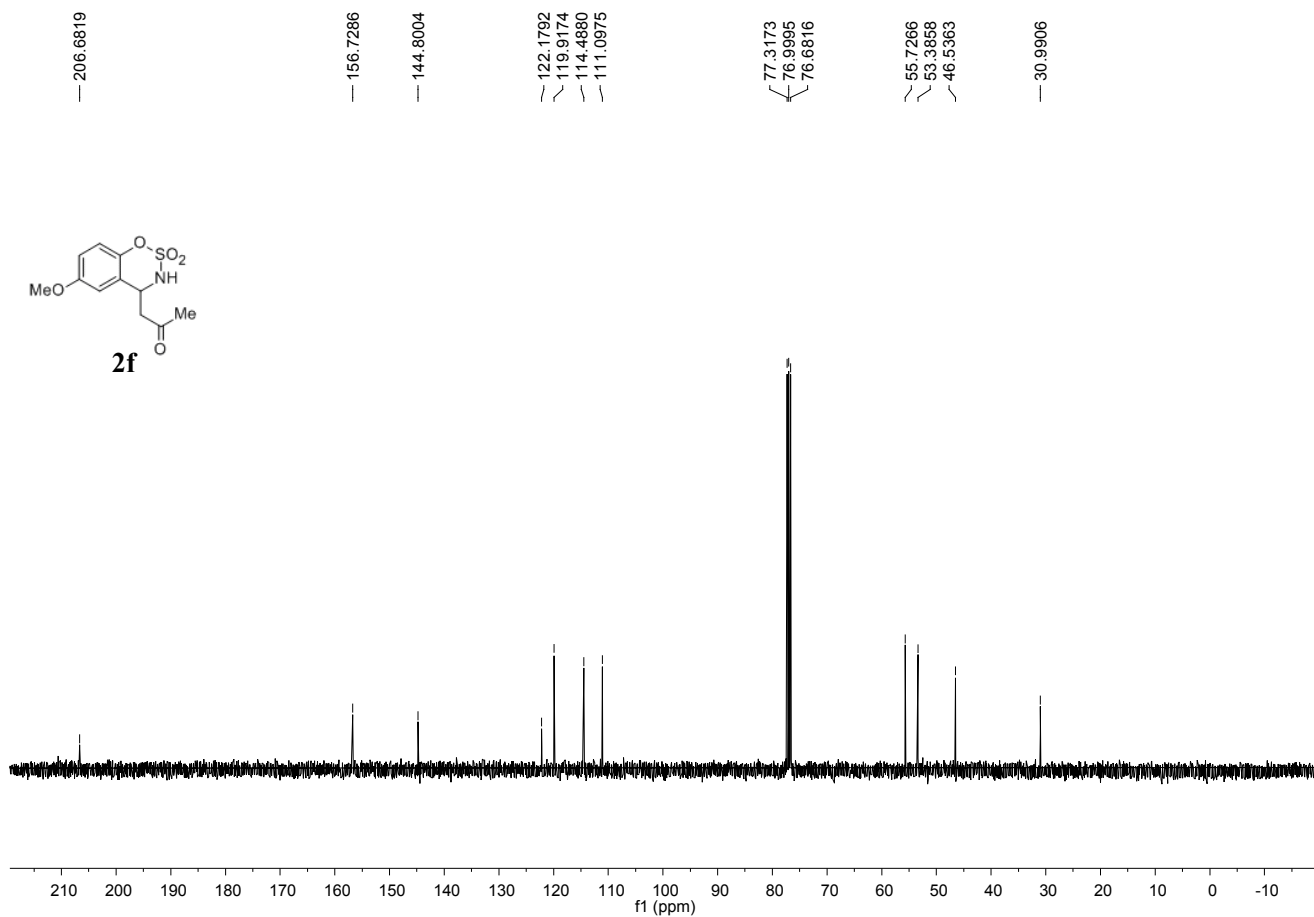

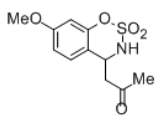

**2g**

6.9551  
6.9335  
6.6769  
6.6717  
6.6554  
6.6501  
6.4514

5.0753  
5.0659  
5.0562  
5.0466  
4.8299

3.7509  
3.5070  
3.4868  
3.4626  
3.4429

2.9031  
2.8941  
2.8589  
2.8494

— 2.1918

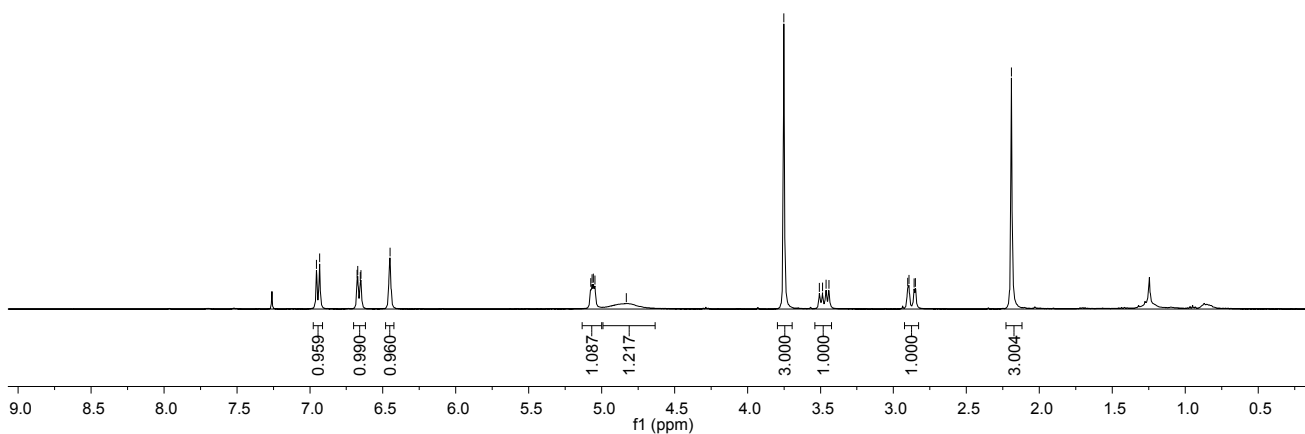

— 206.9354

— 160.3330

— 151.8494

— 126.3732

112.9592  
112.3585

— 103.7715

77.3174  
76.9999  
76.6822

55.6114  
53.0107  
46.3272

— 31.0886

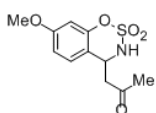

**2g**

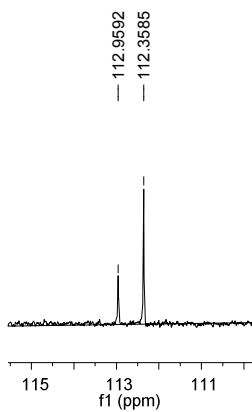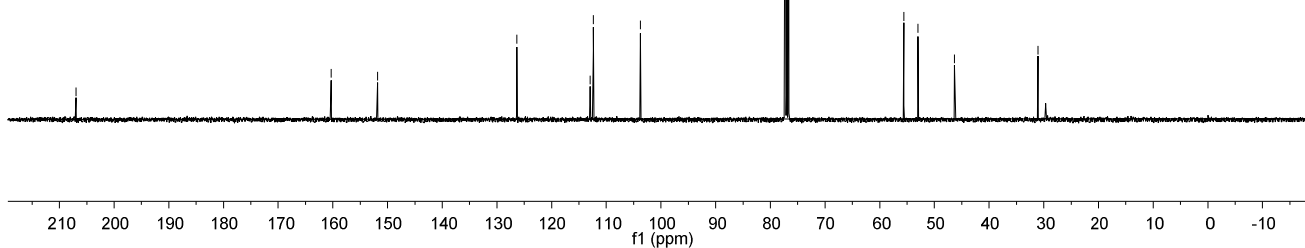

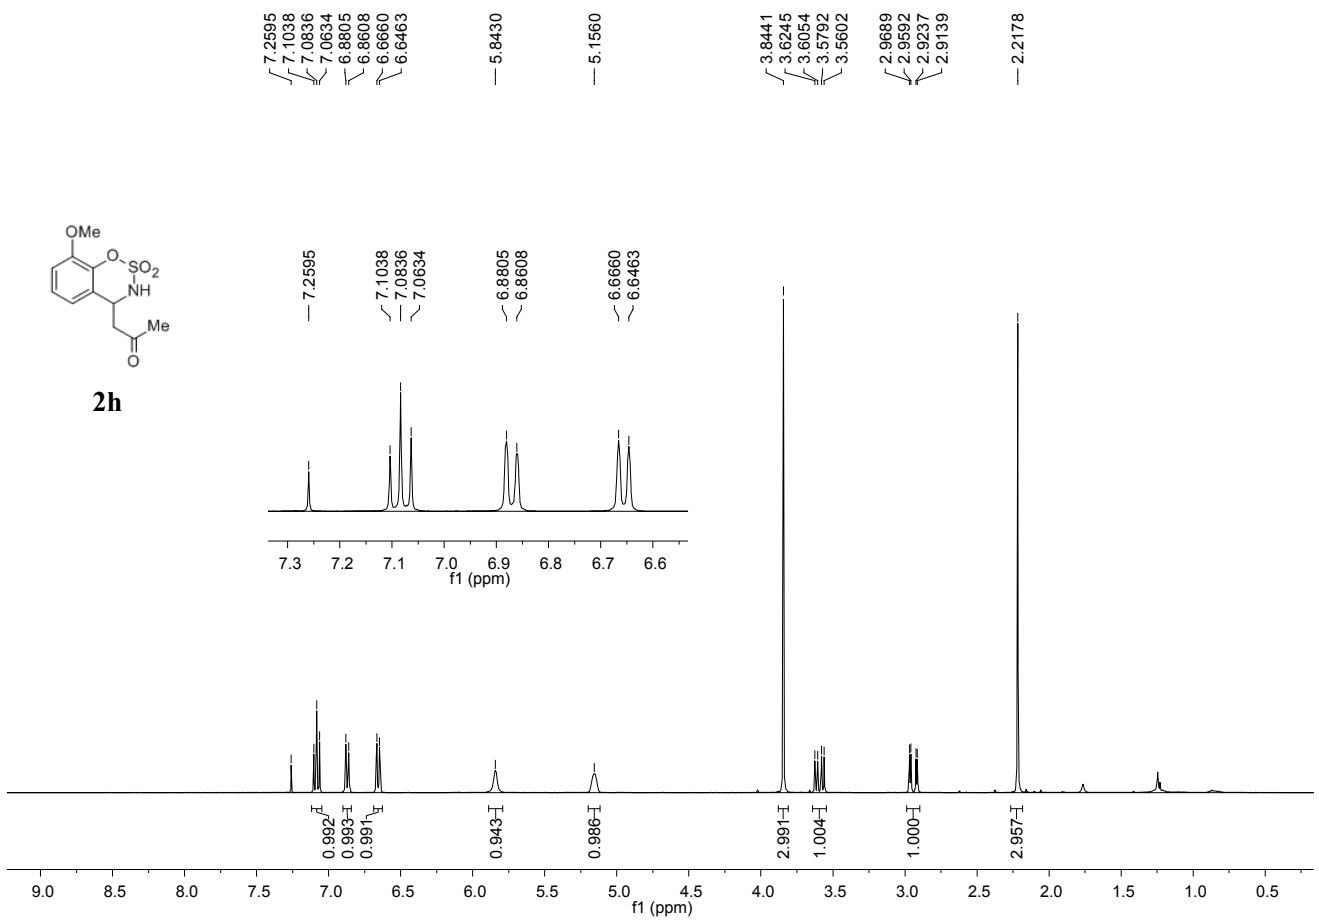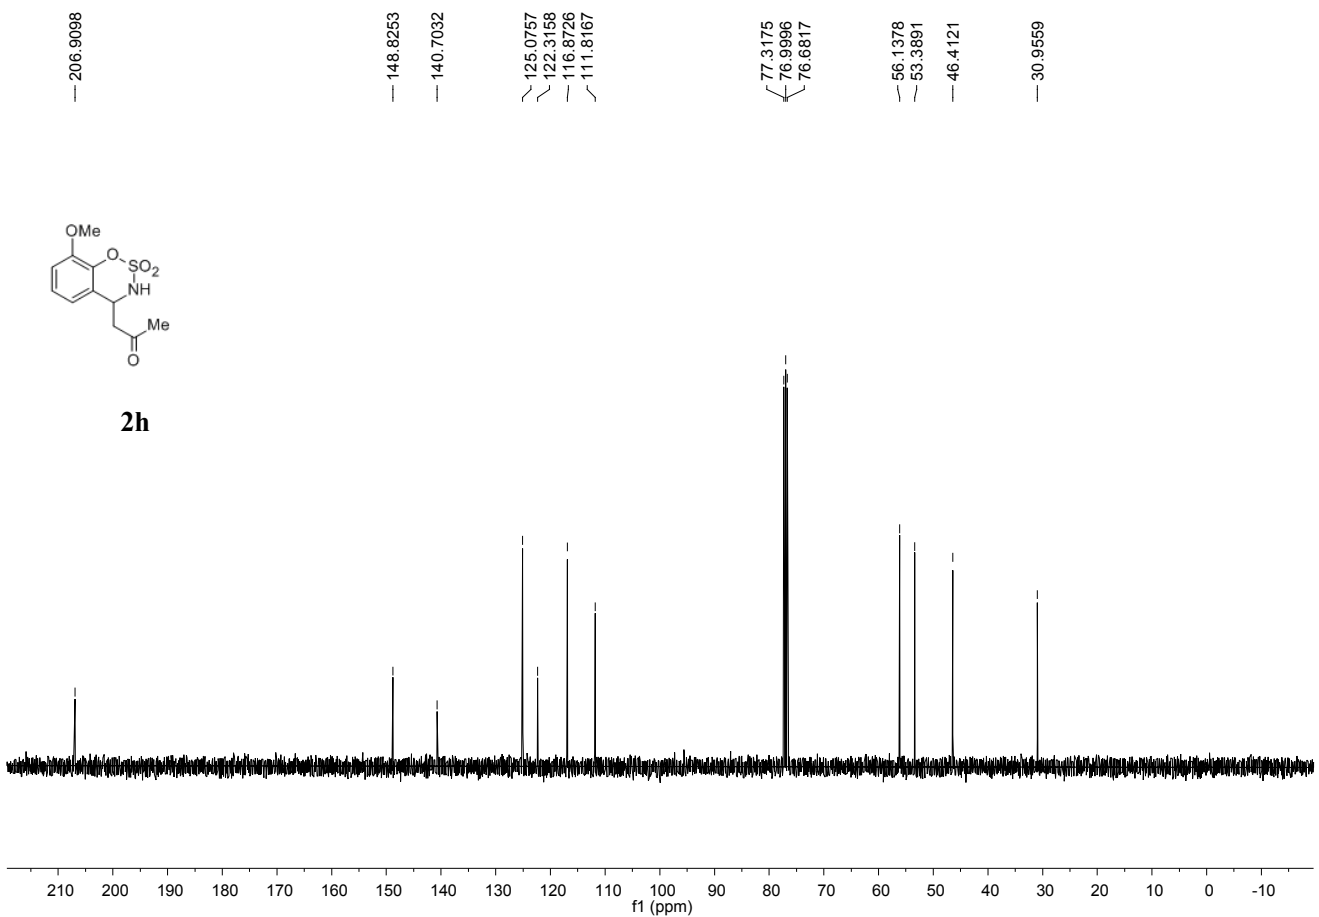

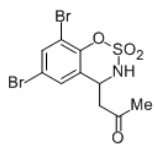

**2i**

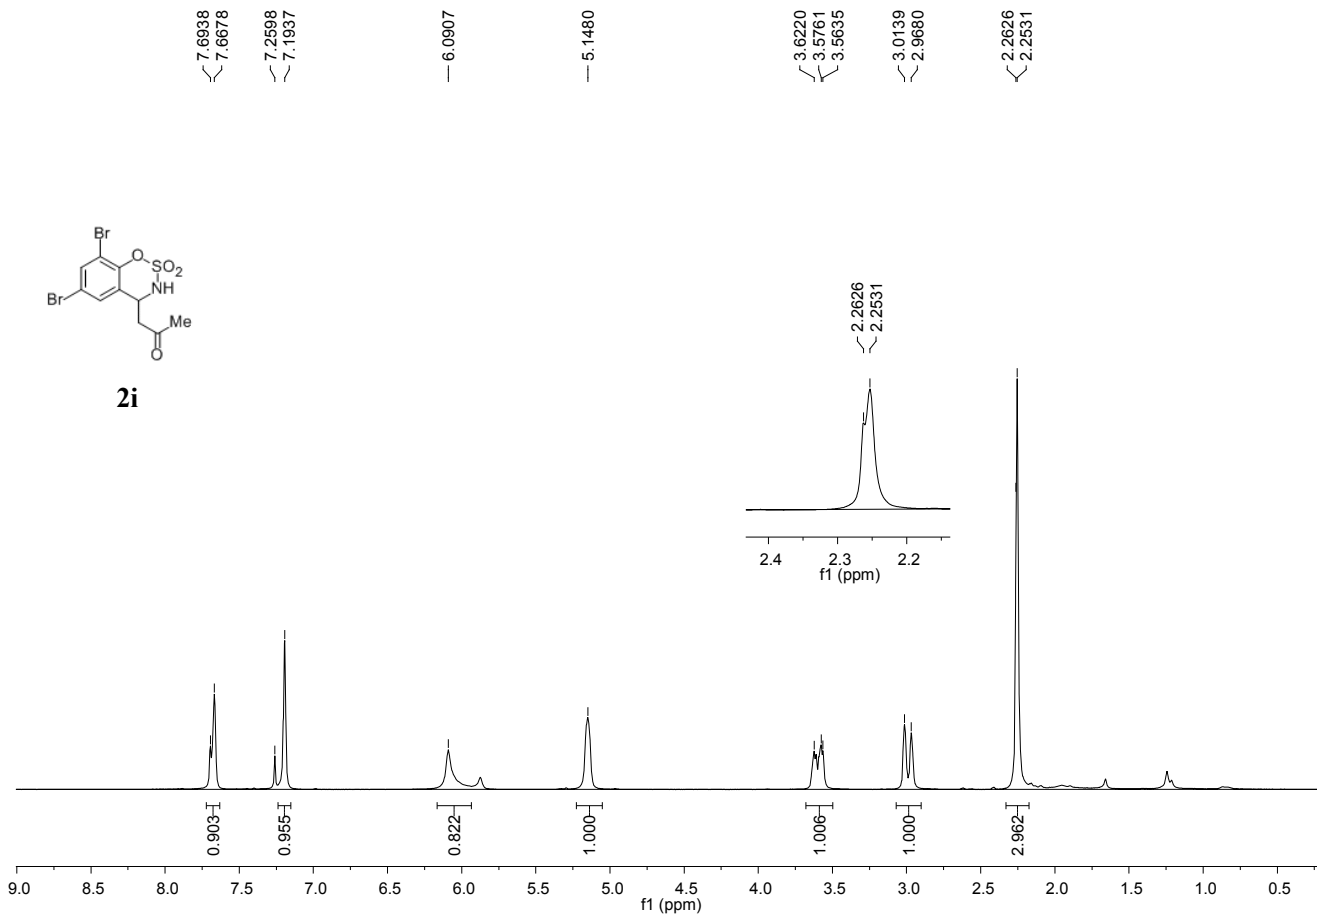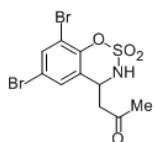

**2i**

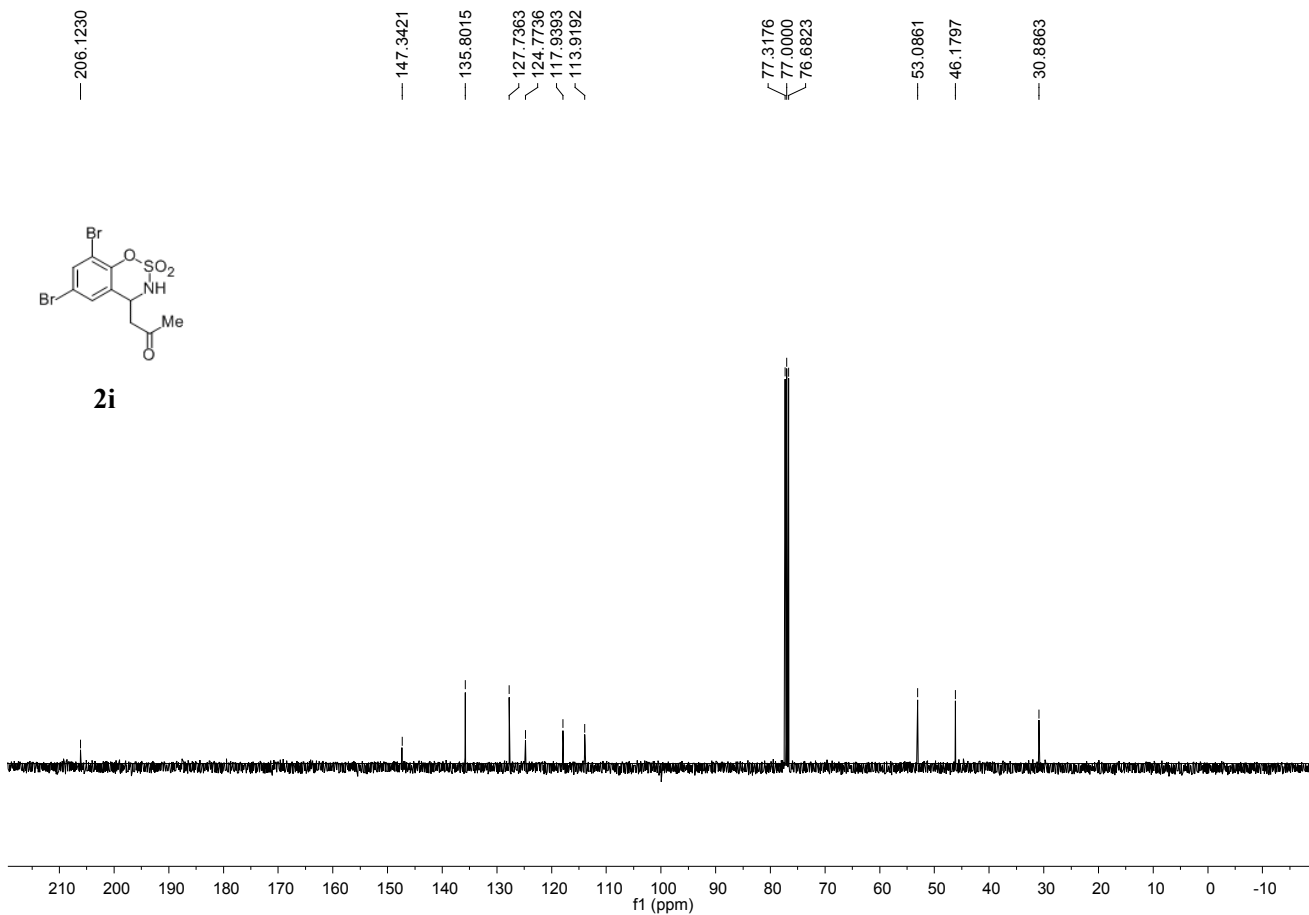

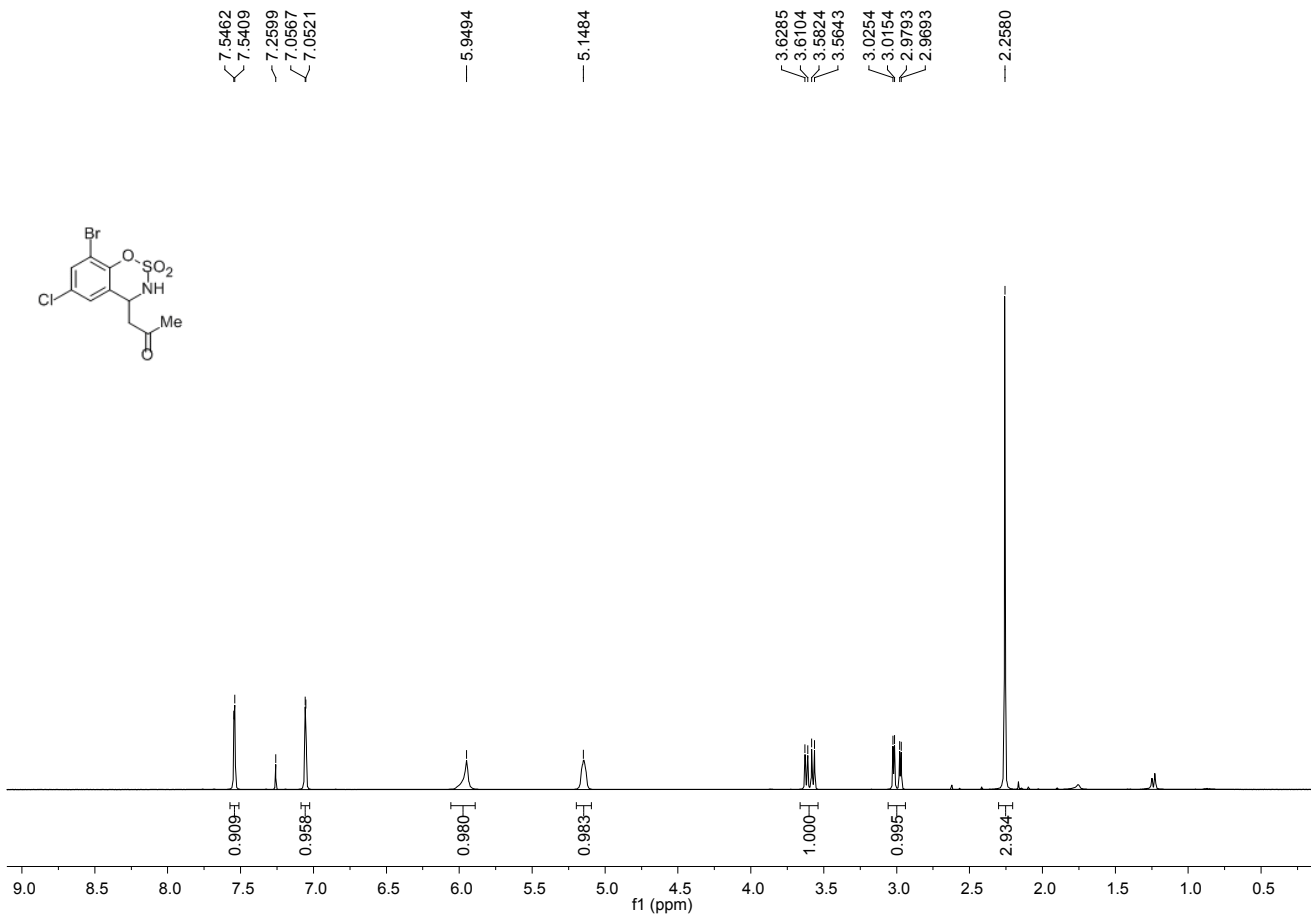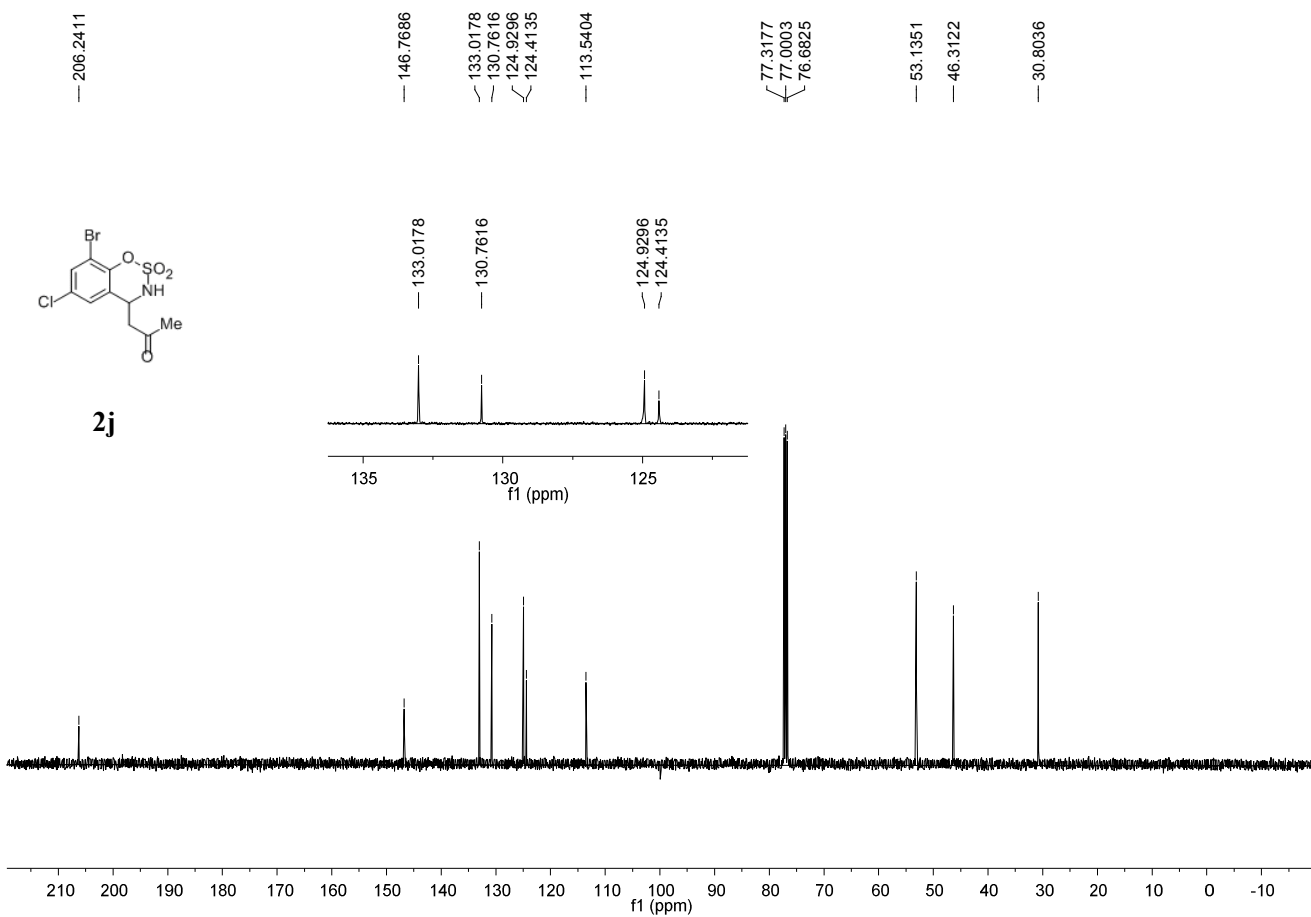



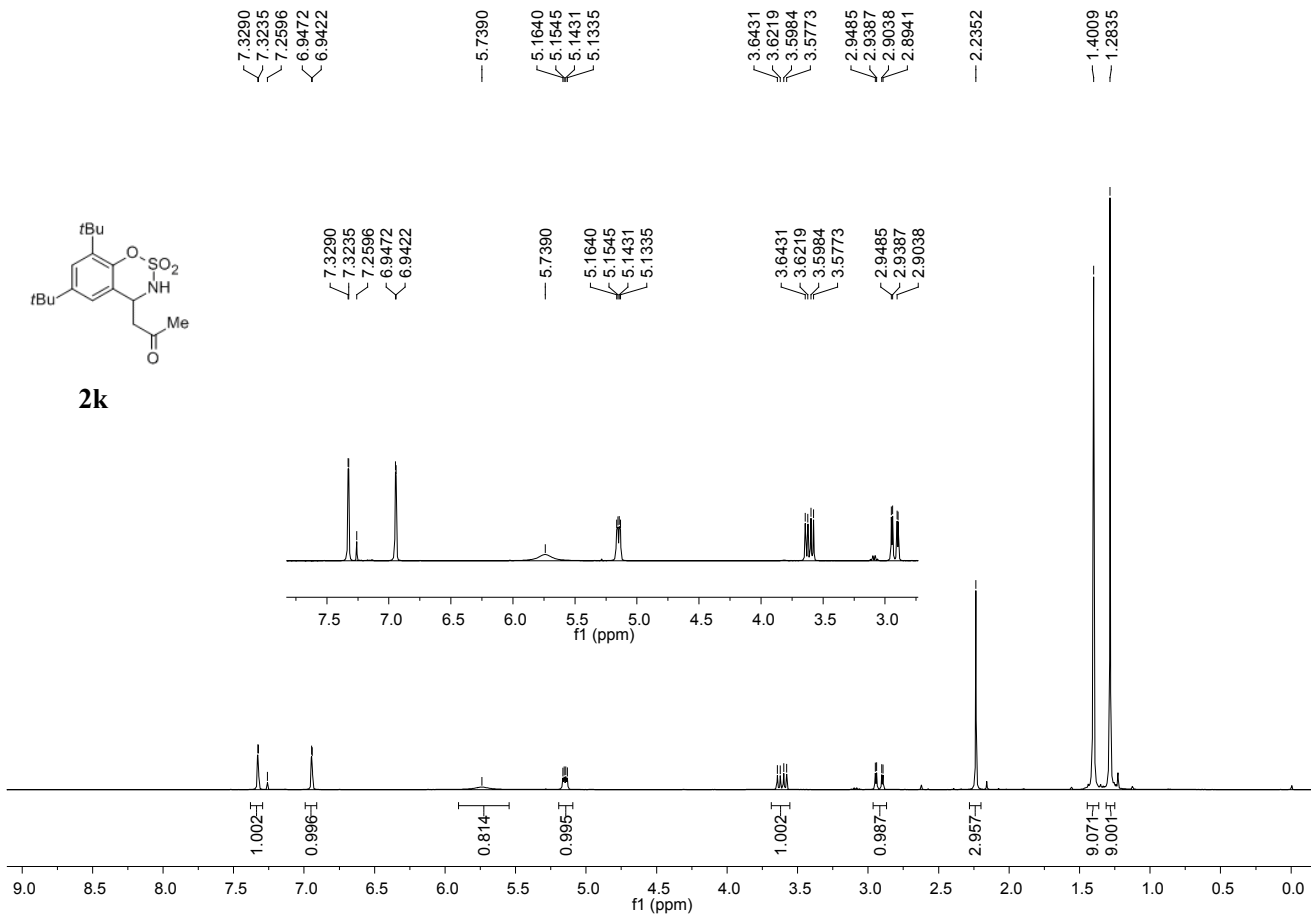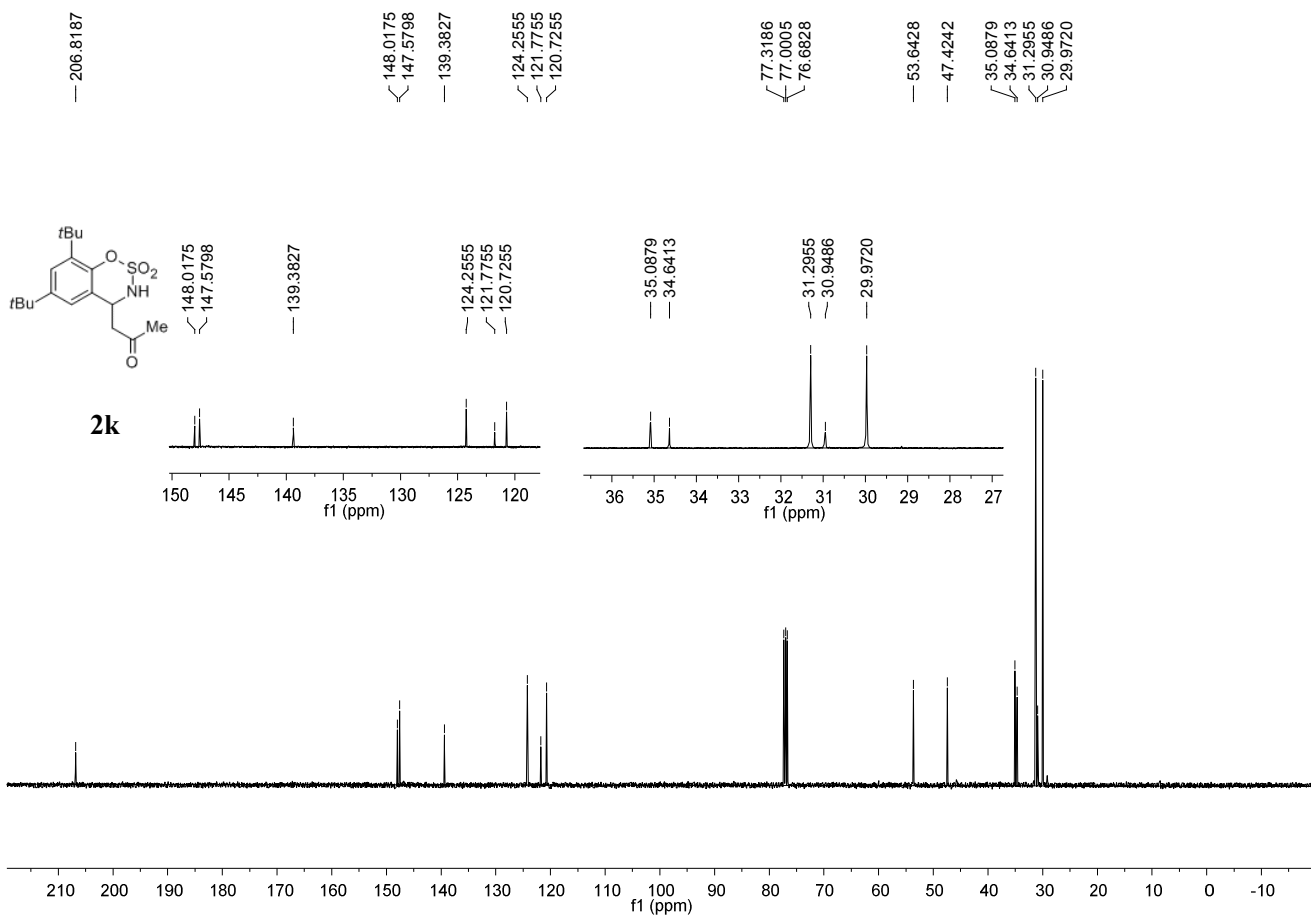

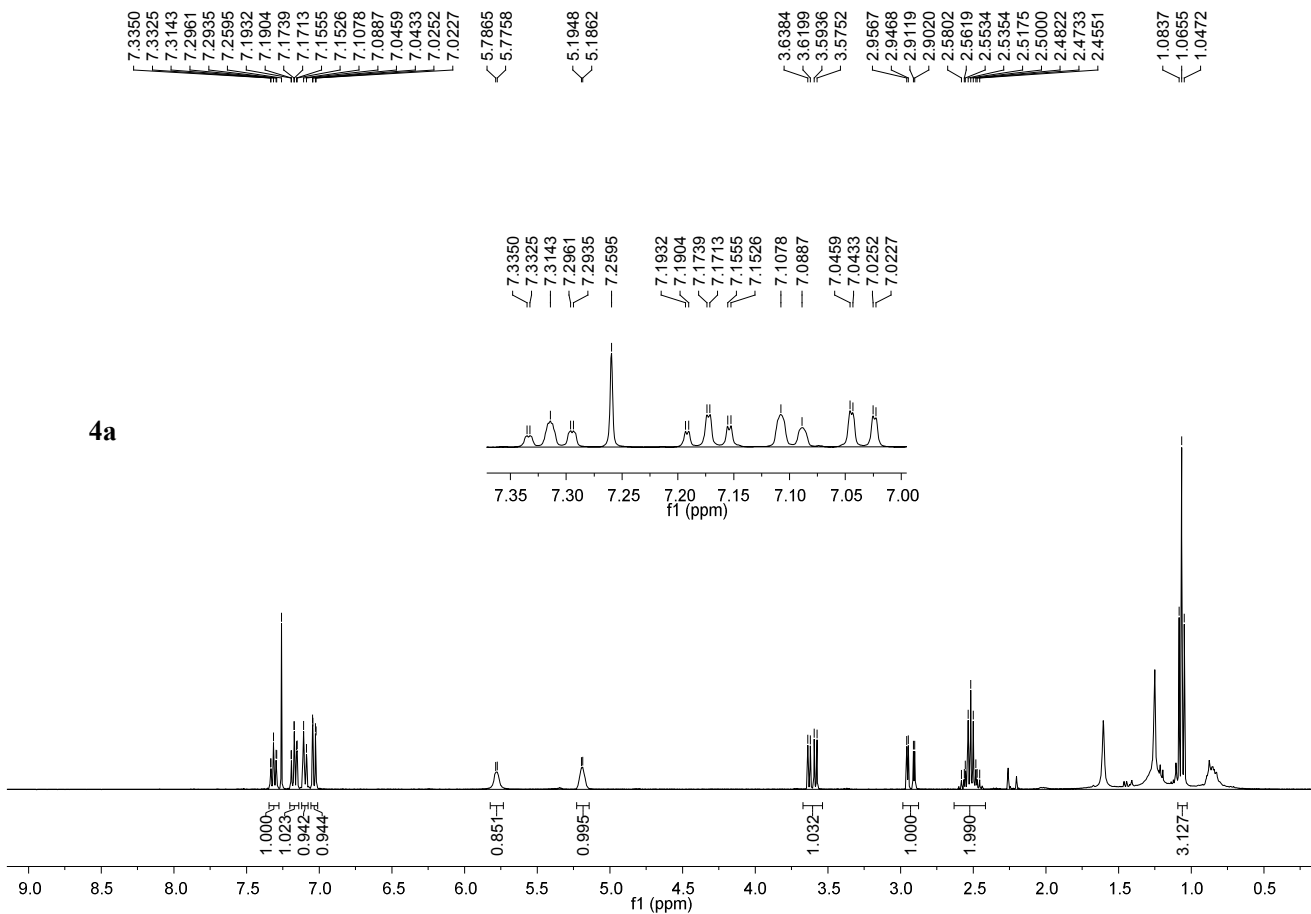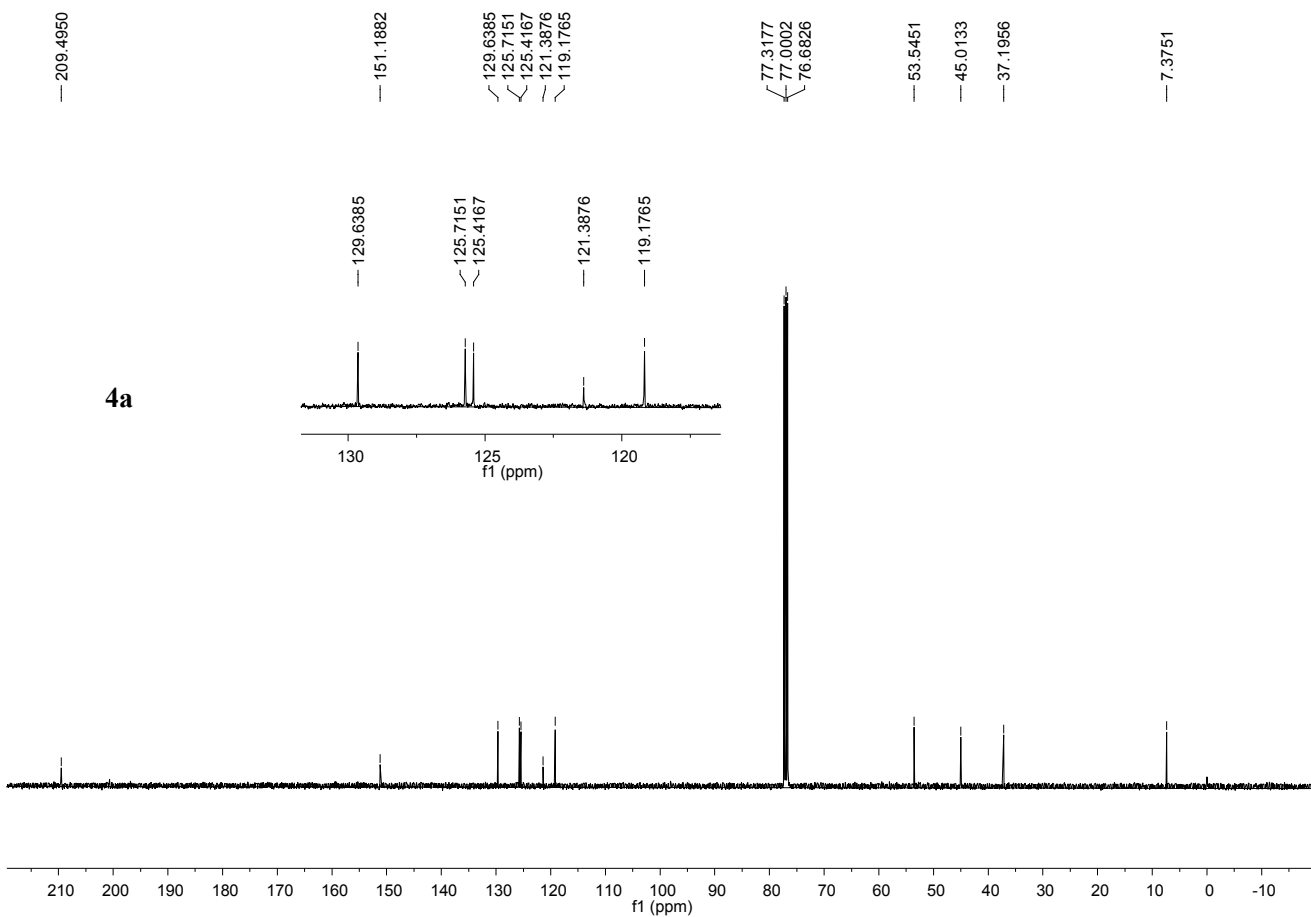

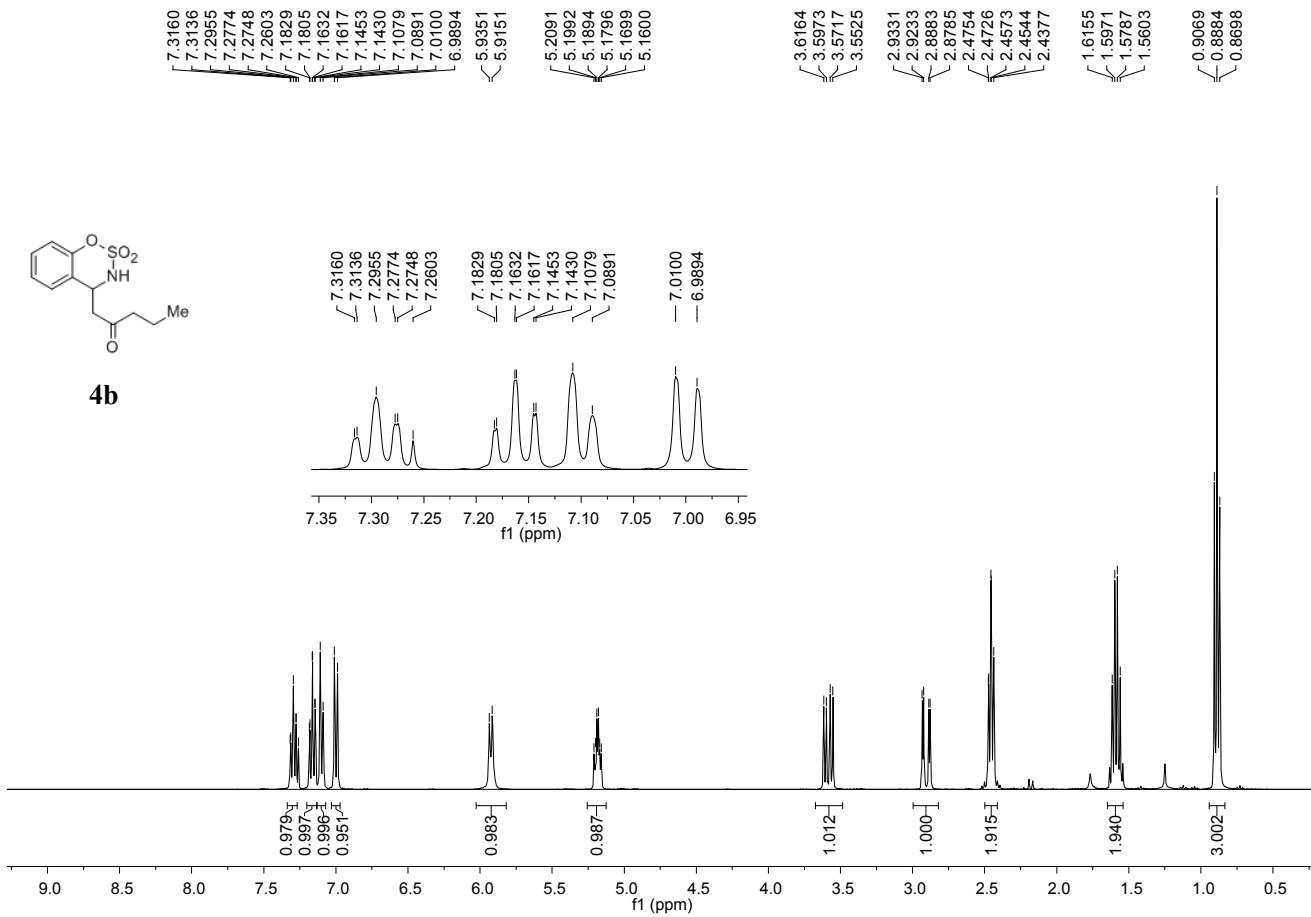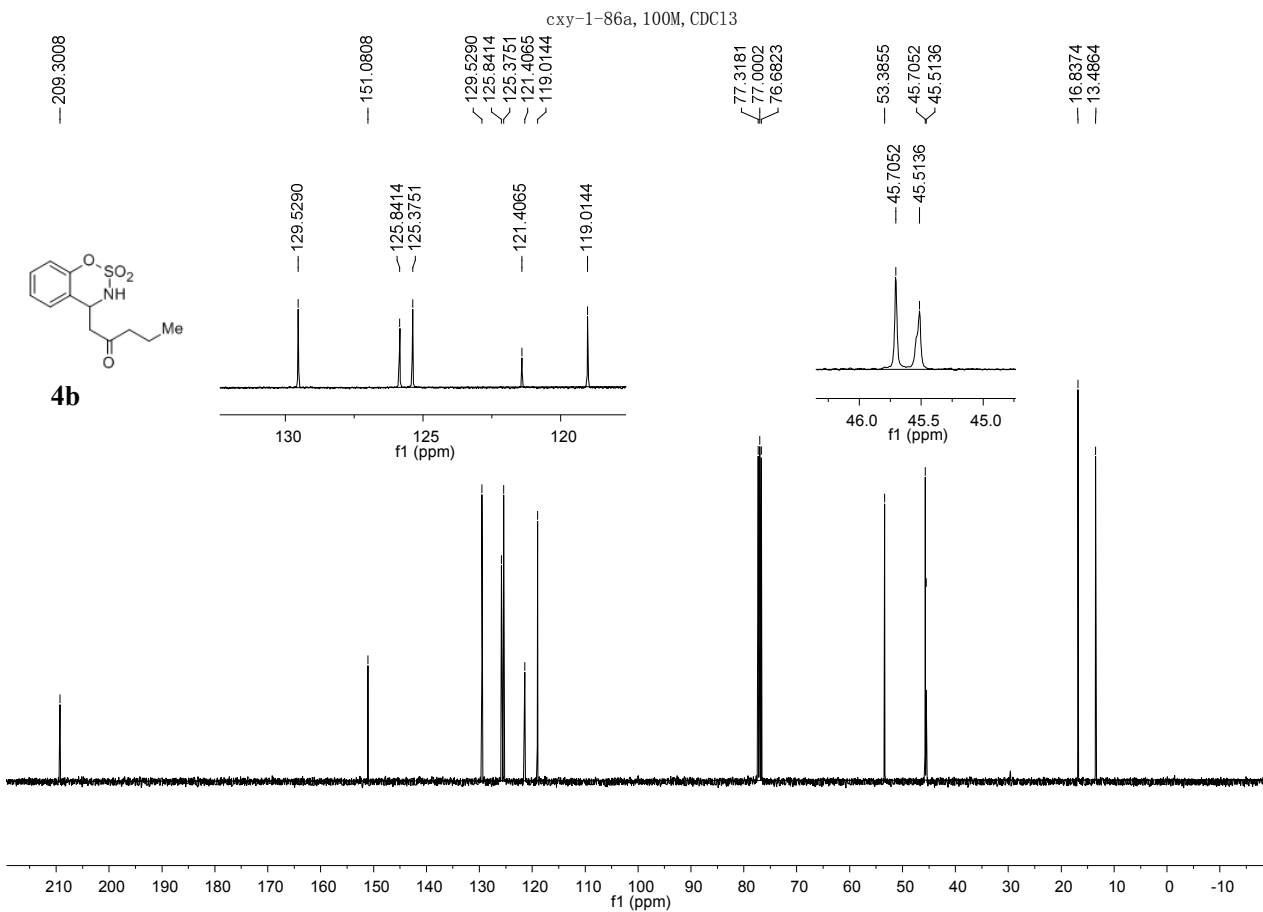

oxy-1-87c, 400M, CDCl3

7.3191  
7.3171  
7.2989  
7.2806  
7.2784  
7.2603  
7.1827  
7.1647  
7.1470  
7.1076  
7.0887  
7.0158  
6.9953  
— 5.8971  
— 5.1809  
3.6226  
3.6037  
3.5778  
3.5589  
2.9408  
2.9310  
2.8960  
2.8862  
2.4896  
2.4779  
2.4710  
2.4588  
2.4531  
1.5593  
1.5401  
1.5211  
1.3110  
1.2923  
1.2734  
1.2547  
0.8631  
0.8647

4c

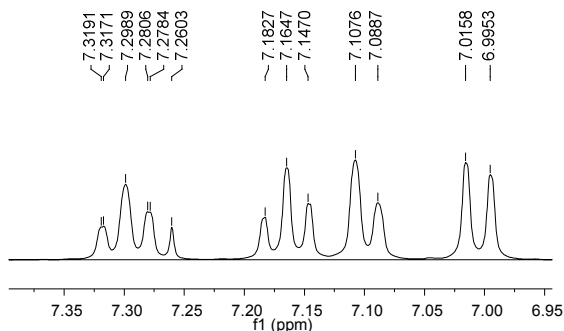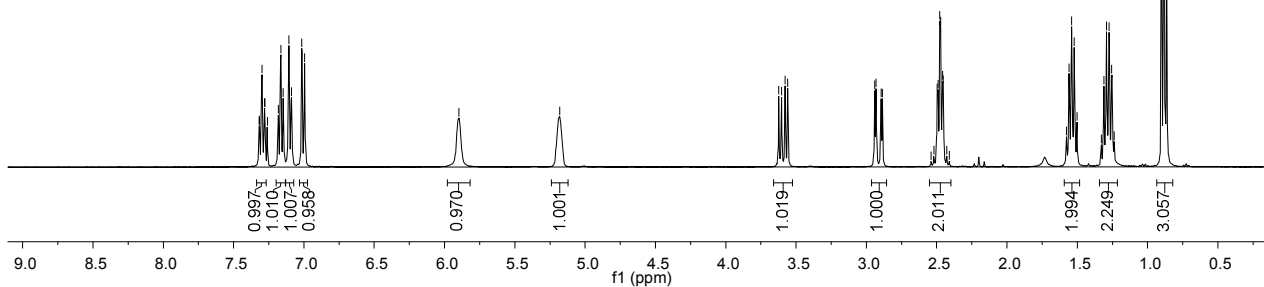

— 209.3933

— 151.1016

129.5420  
125.8249  
125.3733  
121.4158  
119.0432

77.3179  
77.0002  
76.6822

— 53.4152

45.4674  
43.5776

— 25.4067  
— 22.0994

— 13.6991

4c

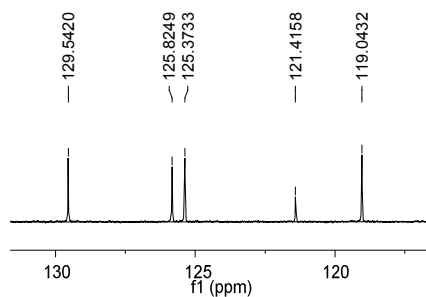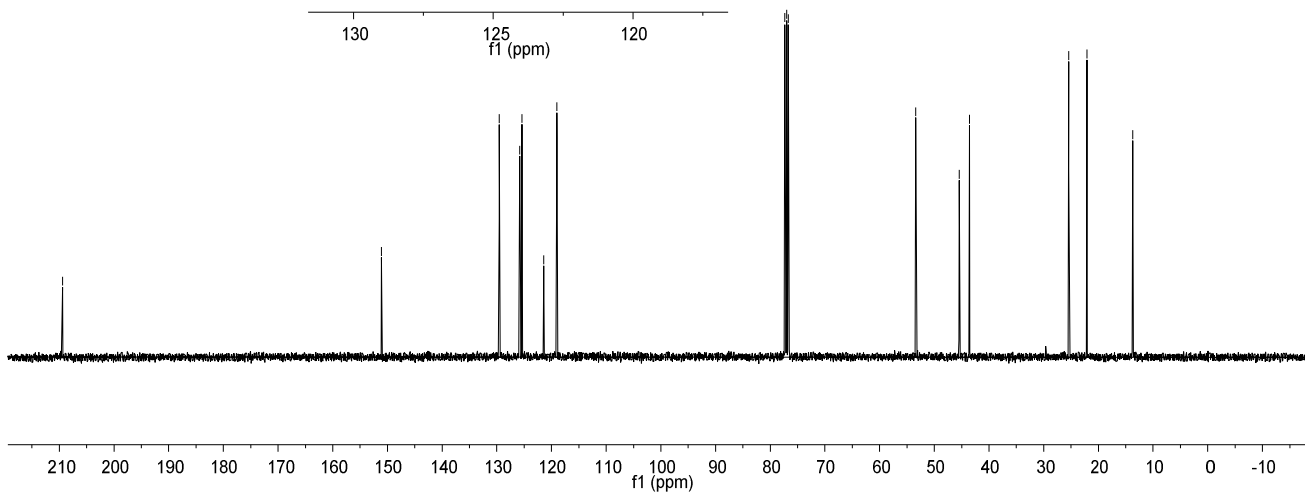

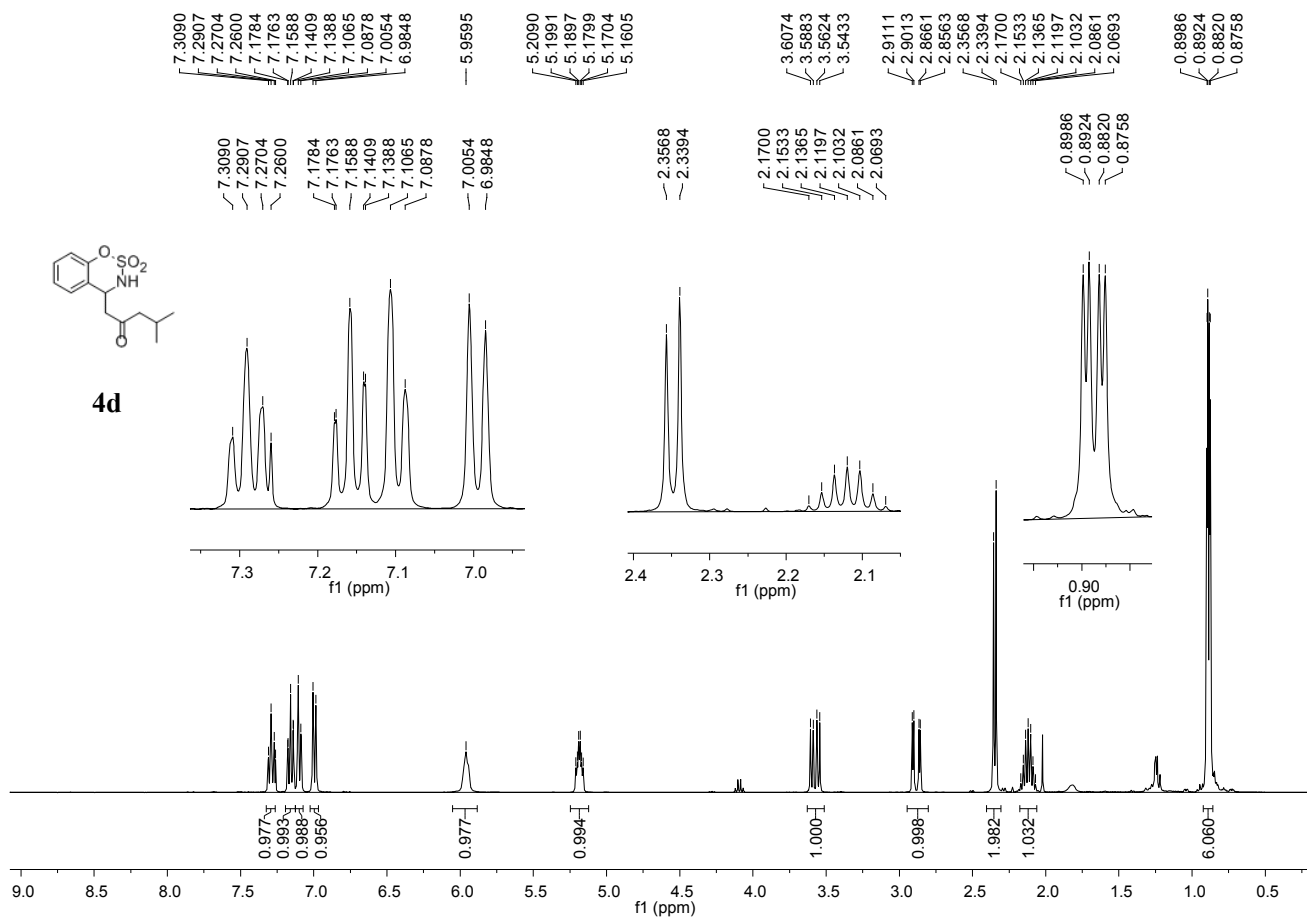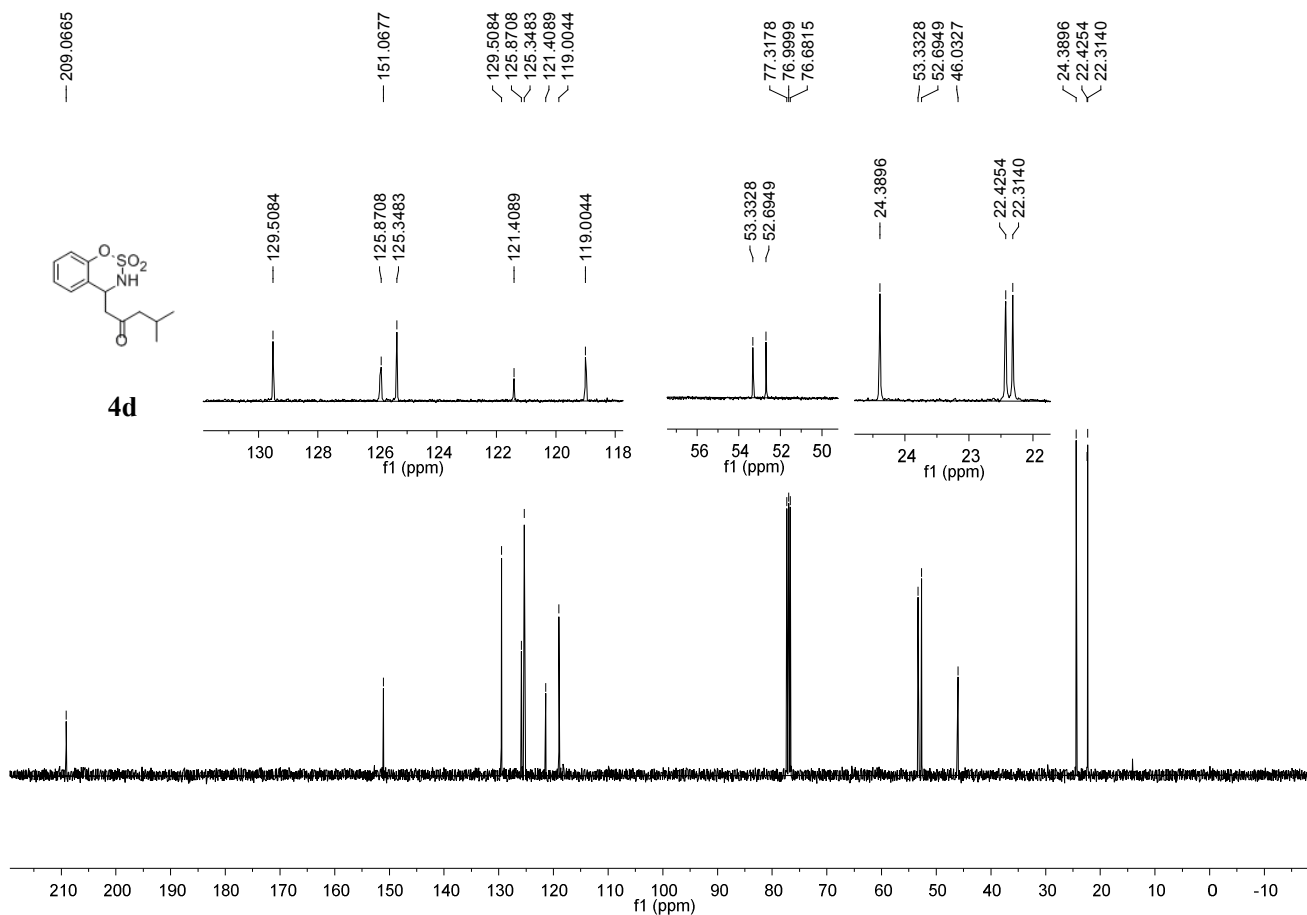

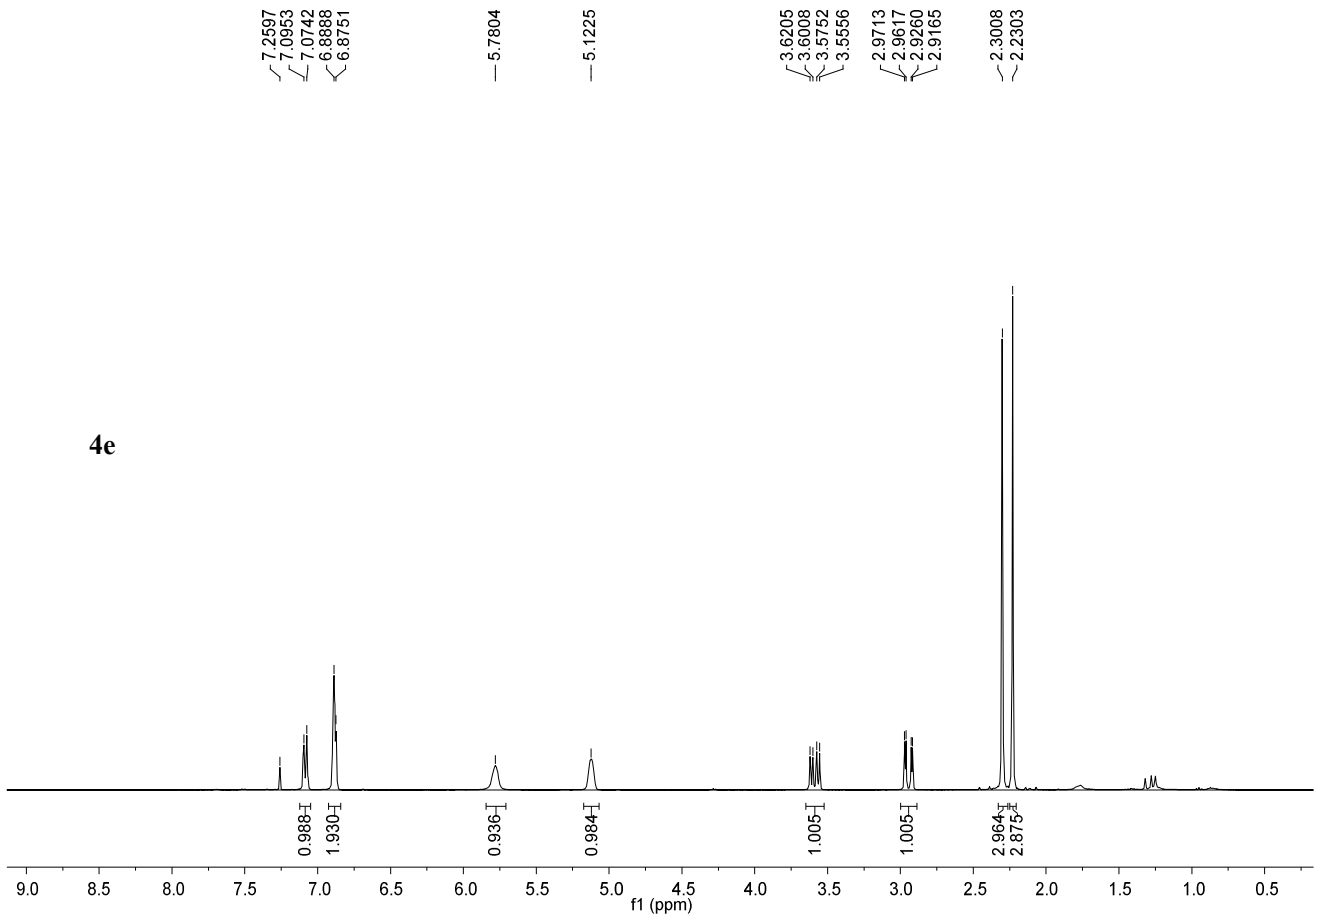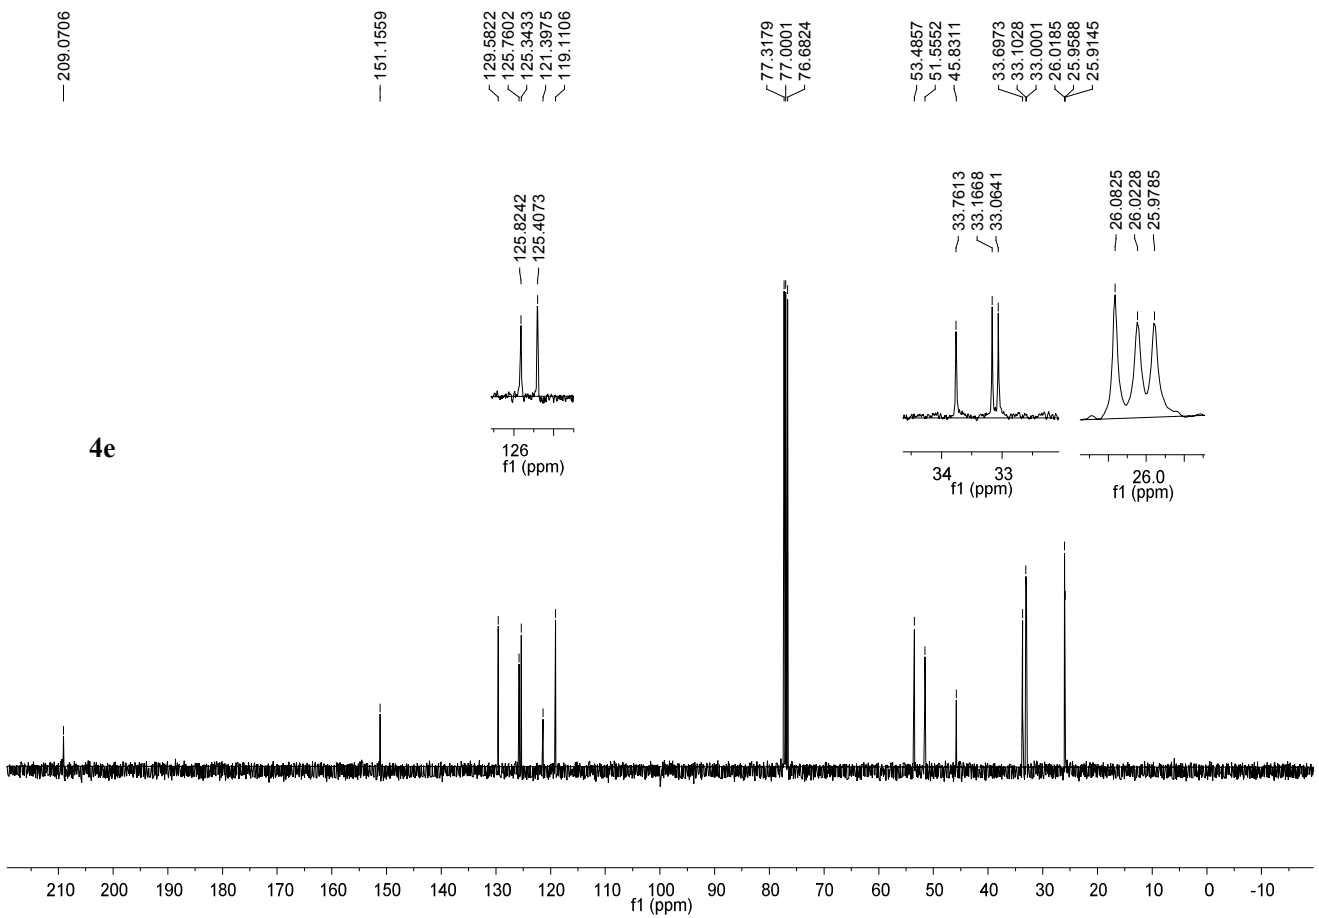

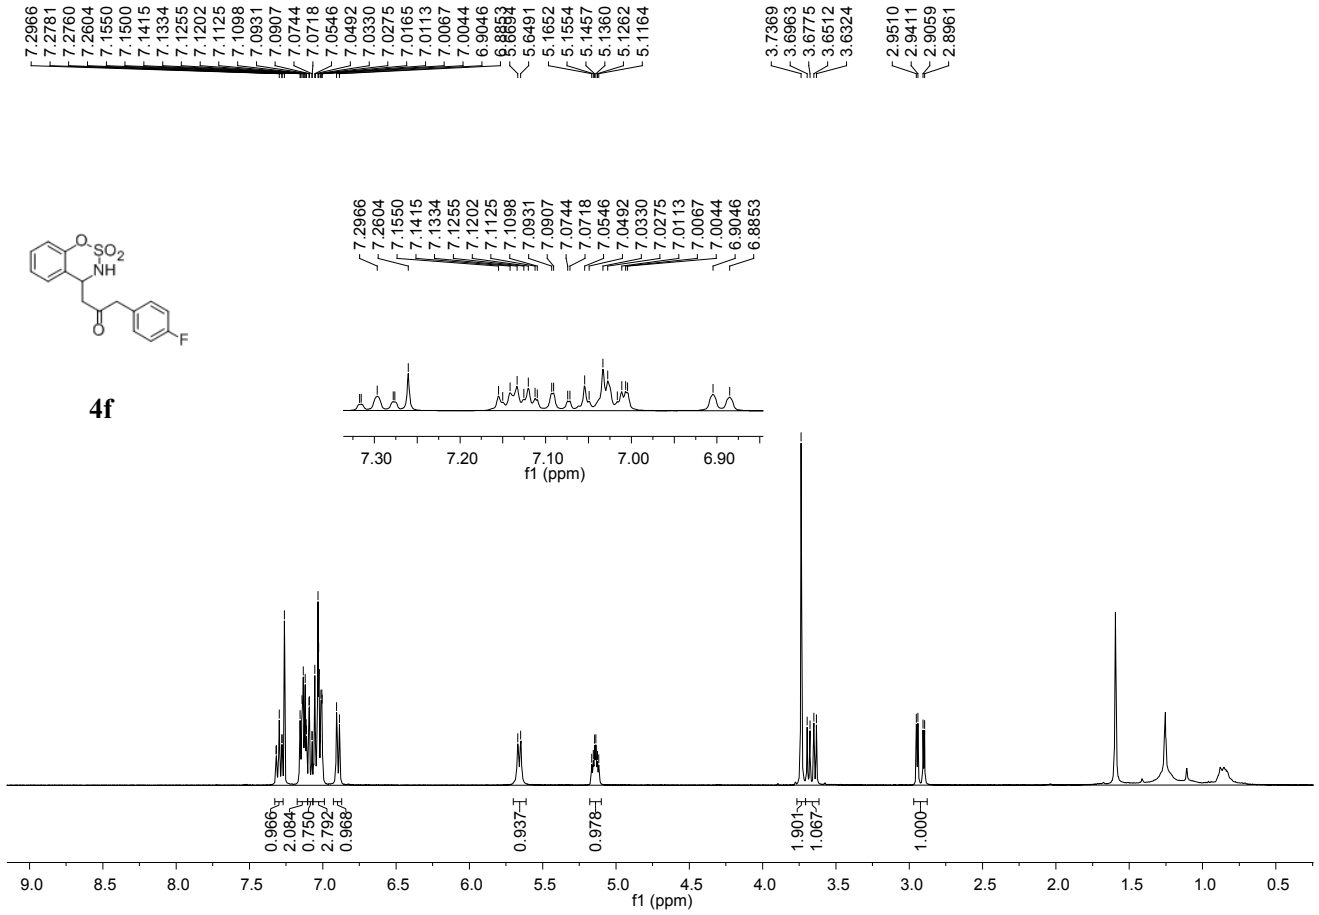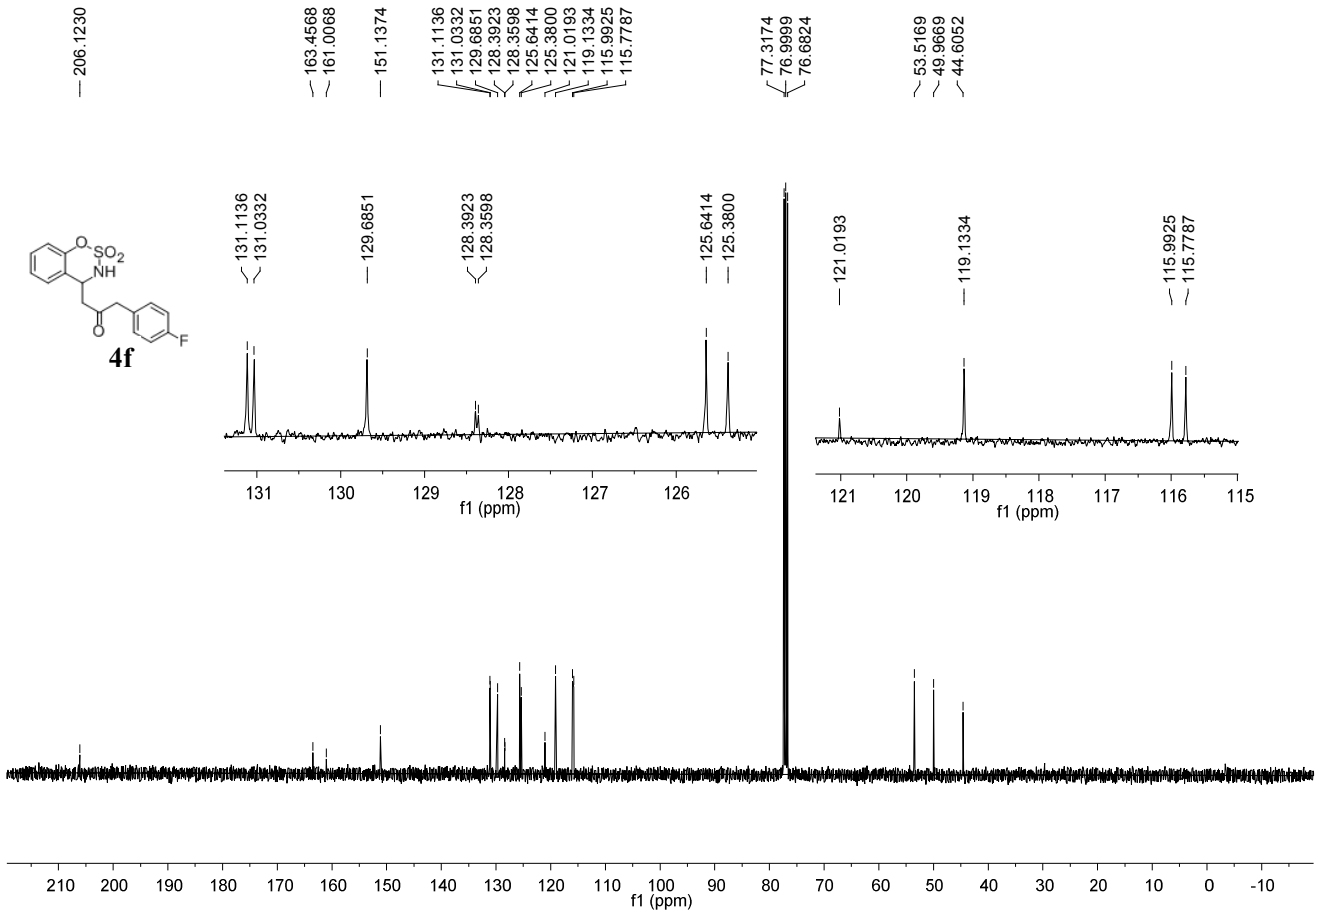

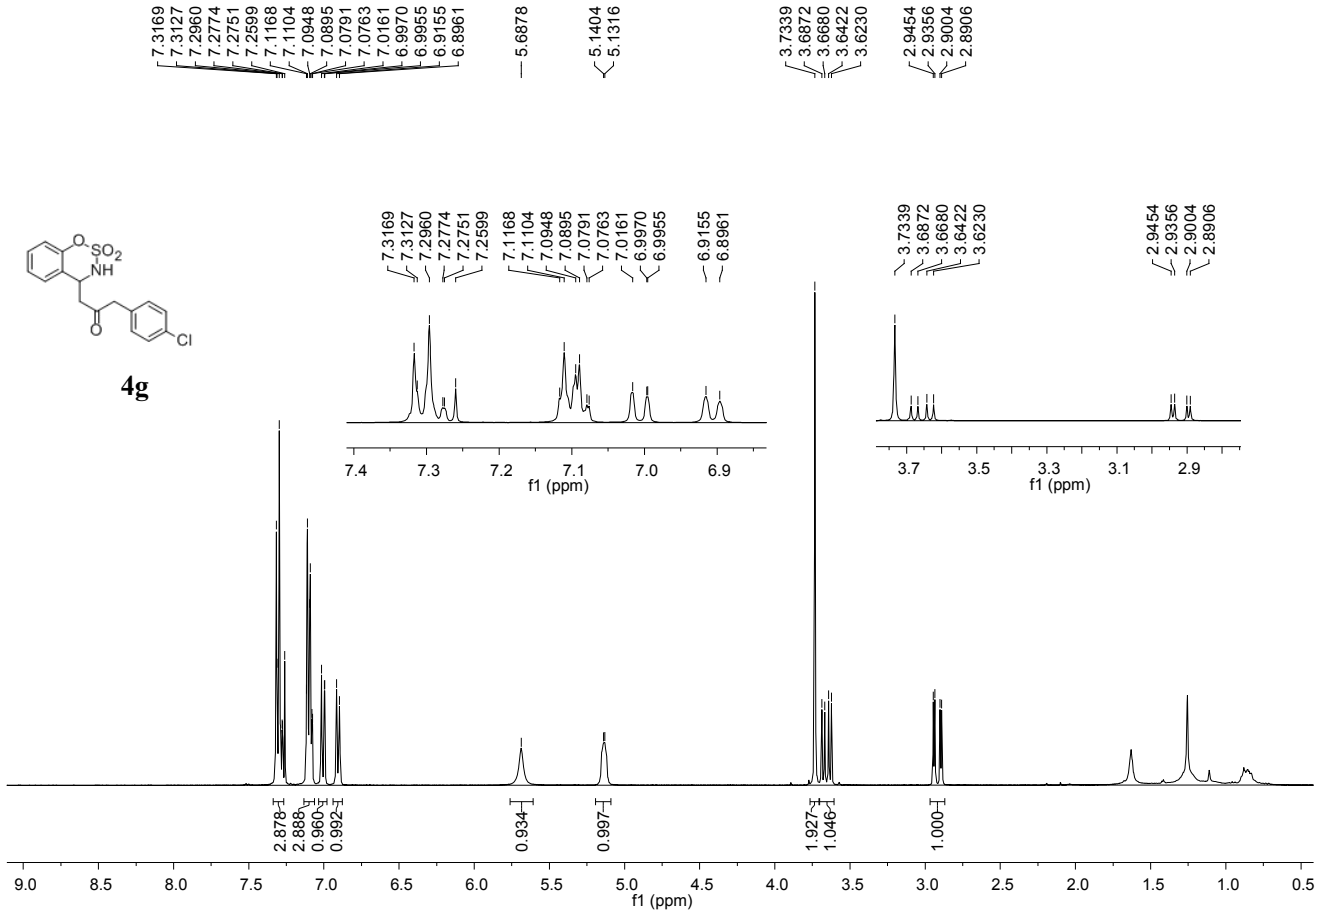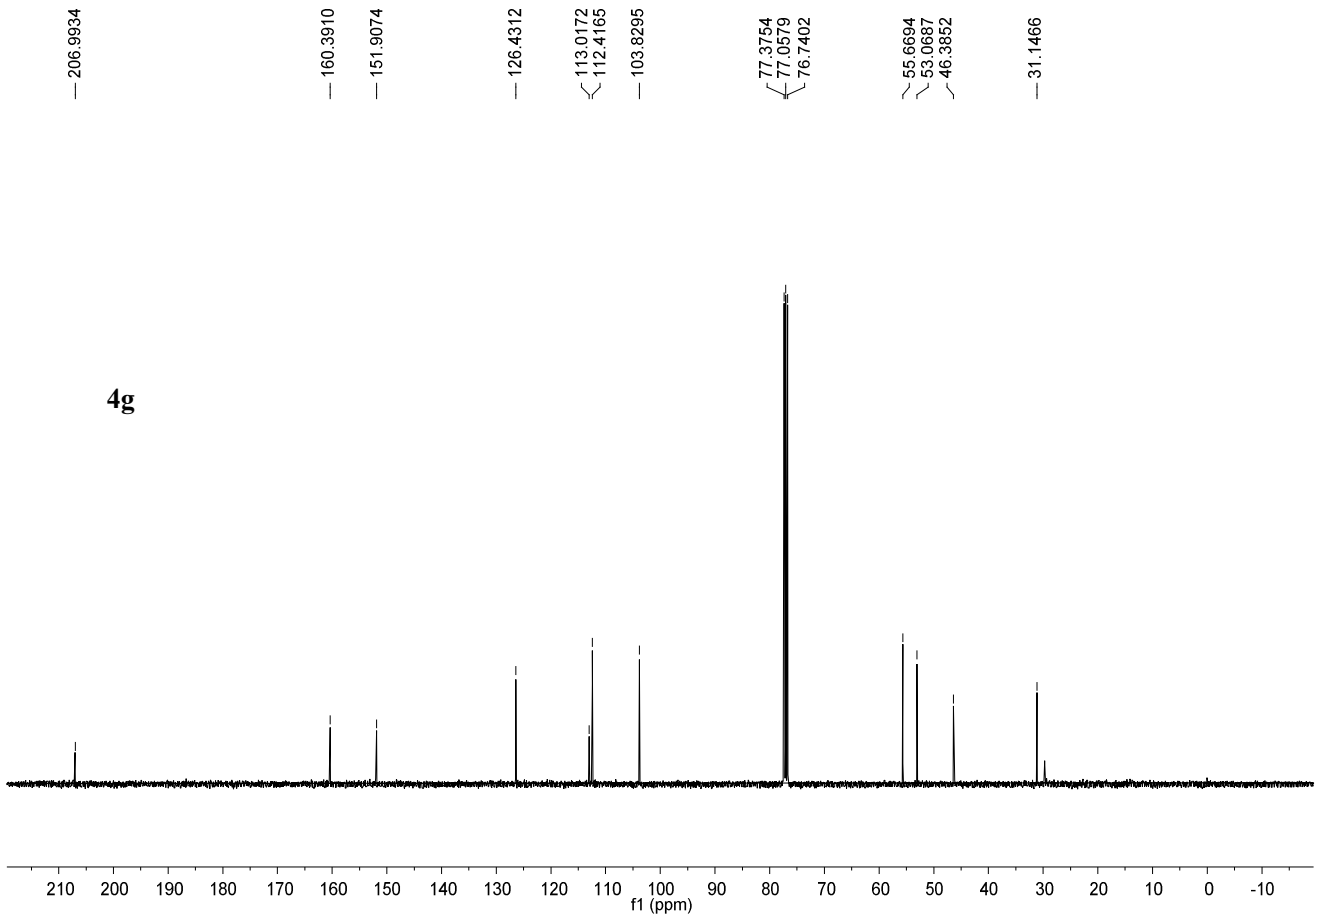



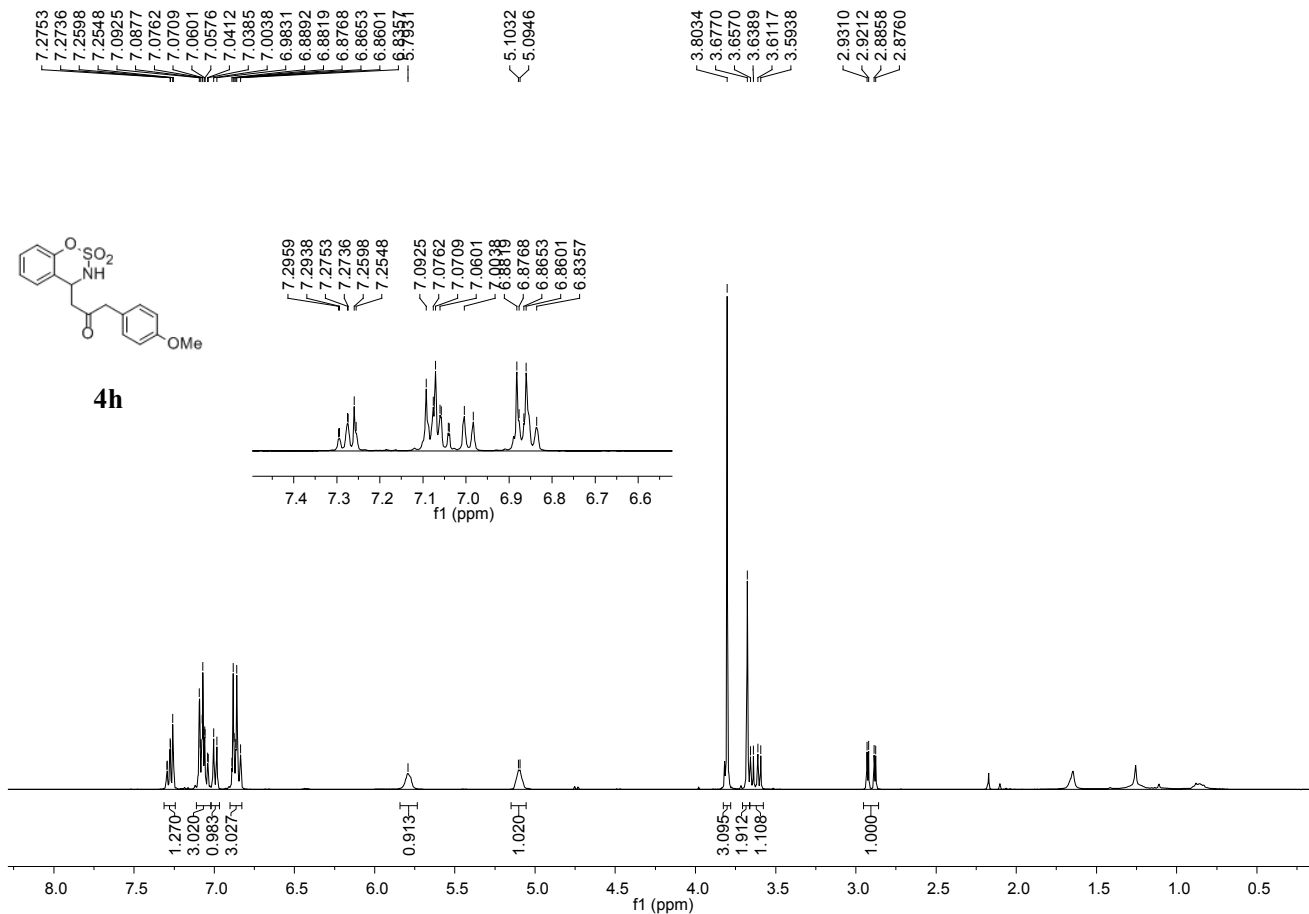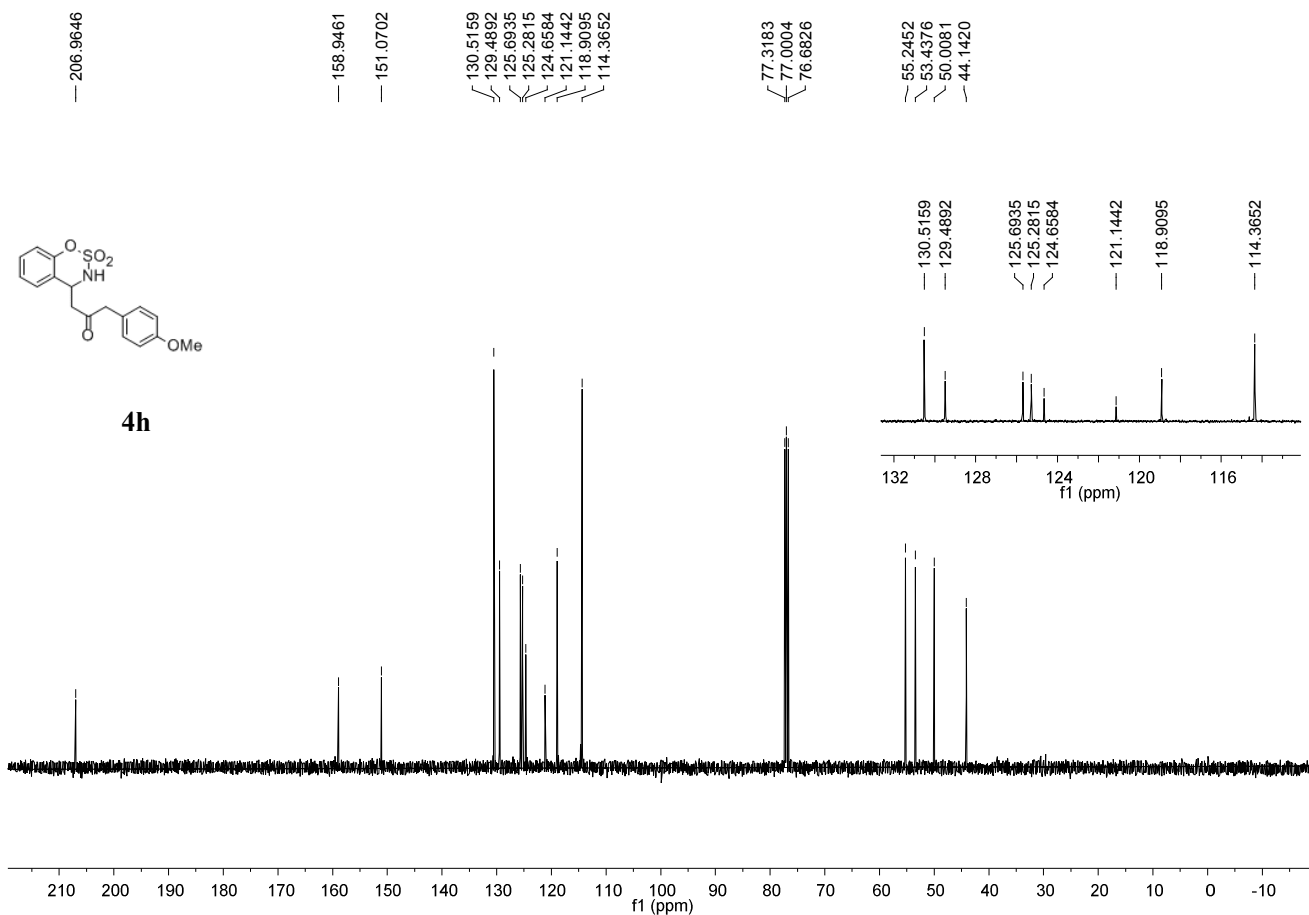

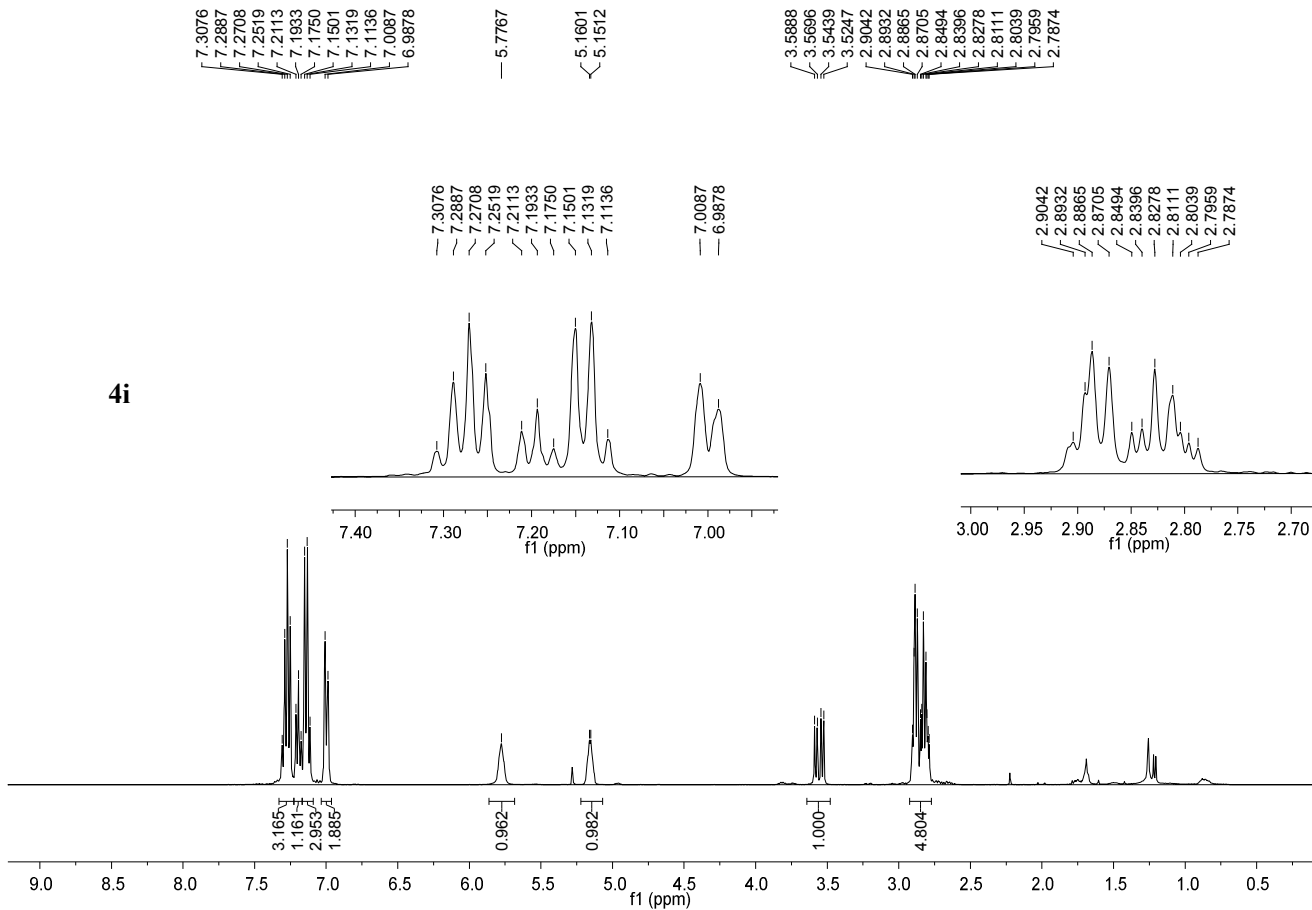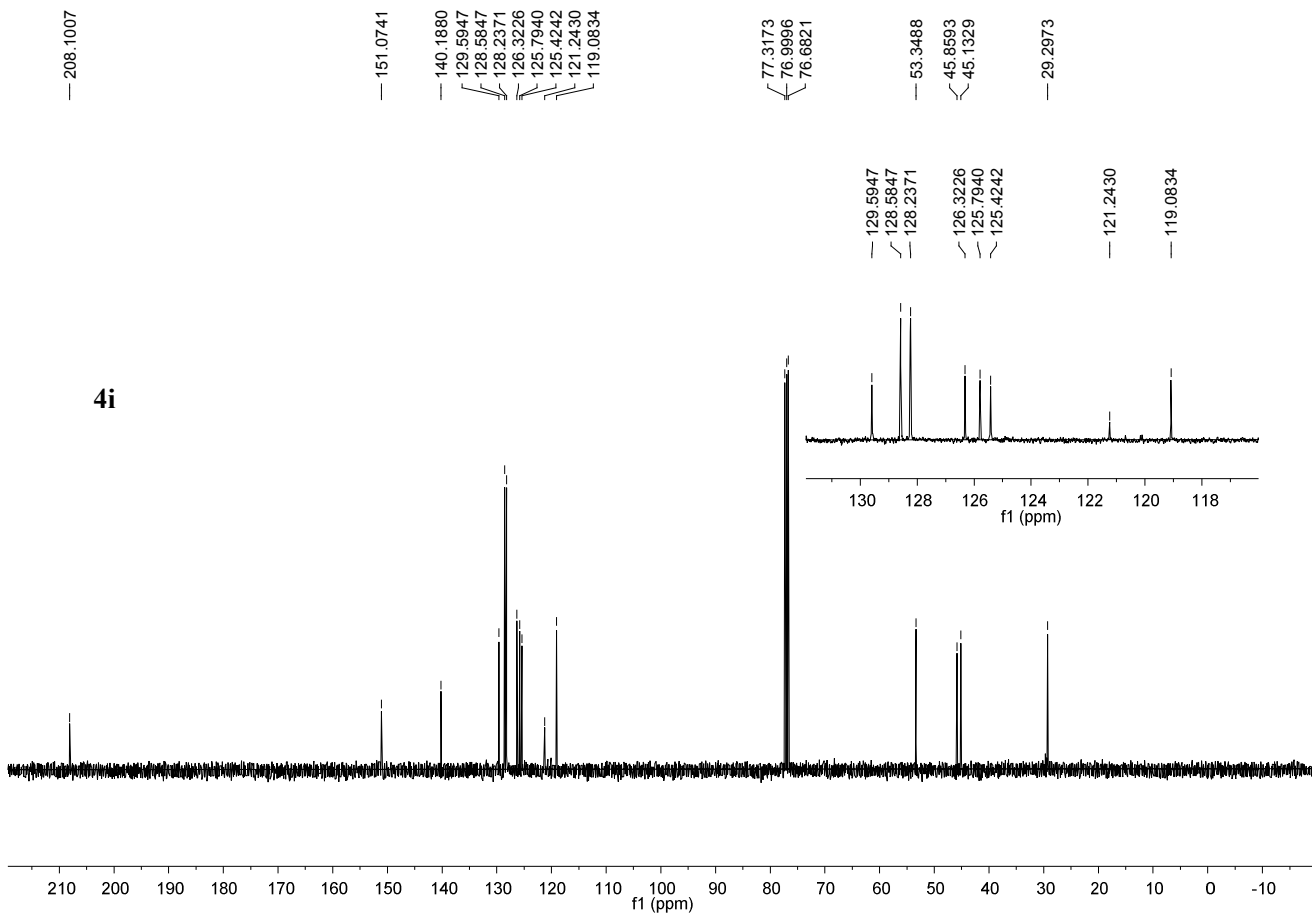

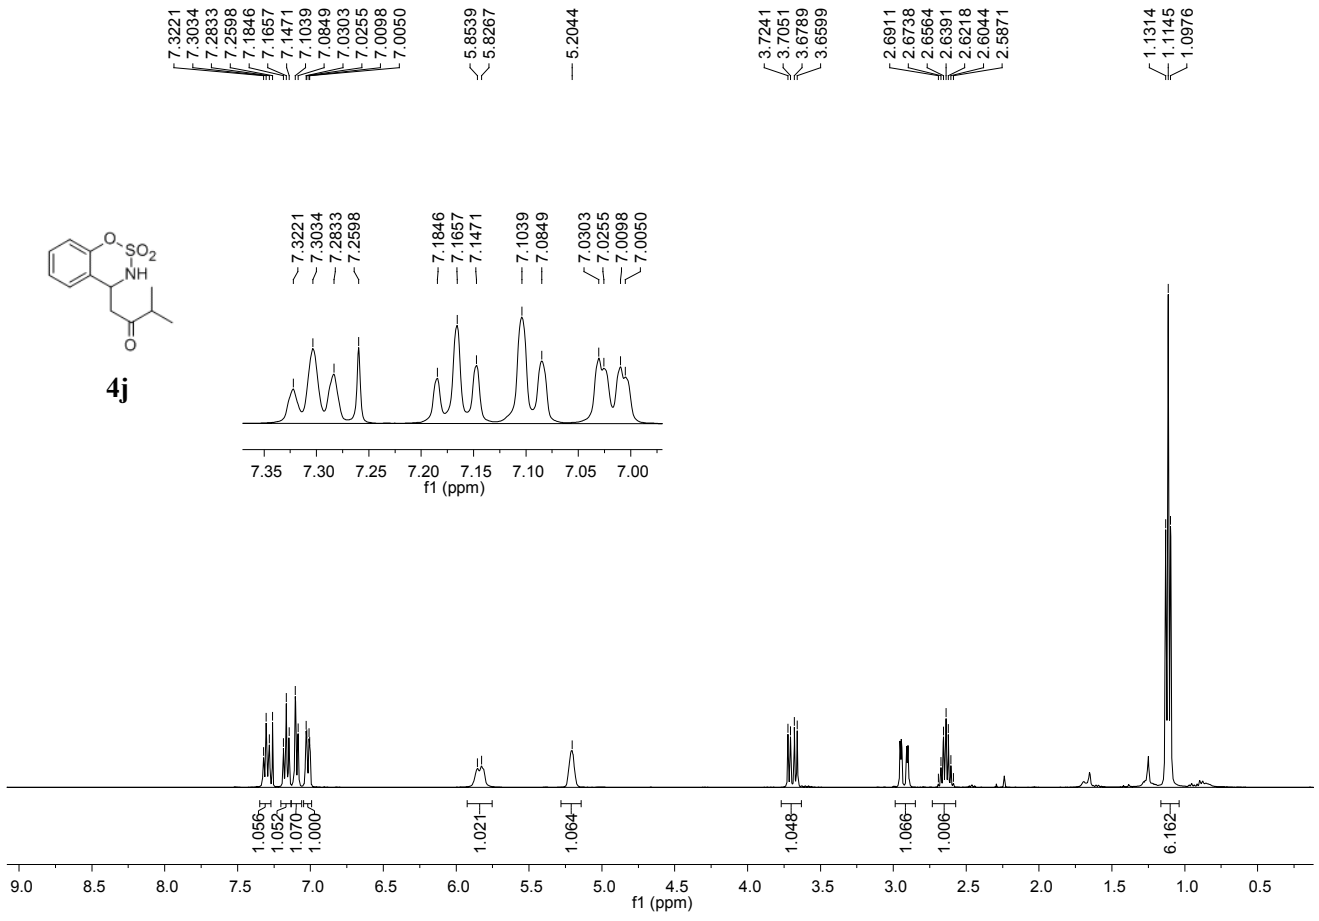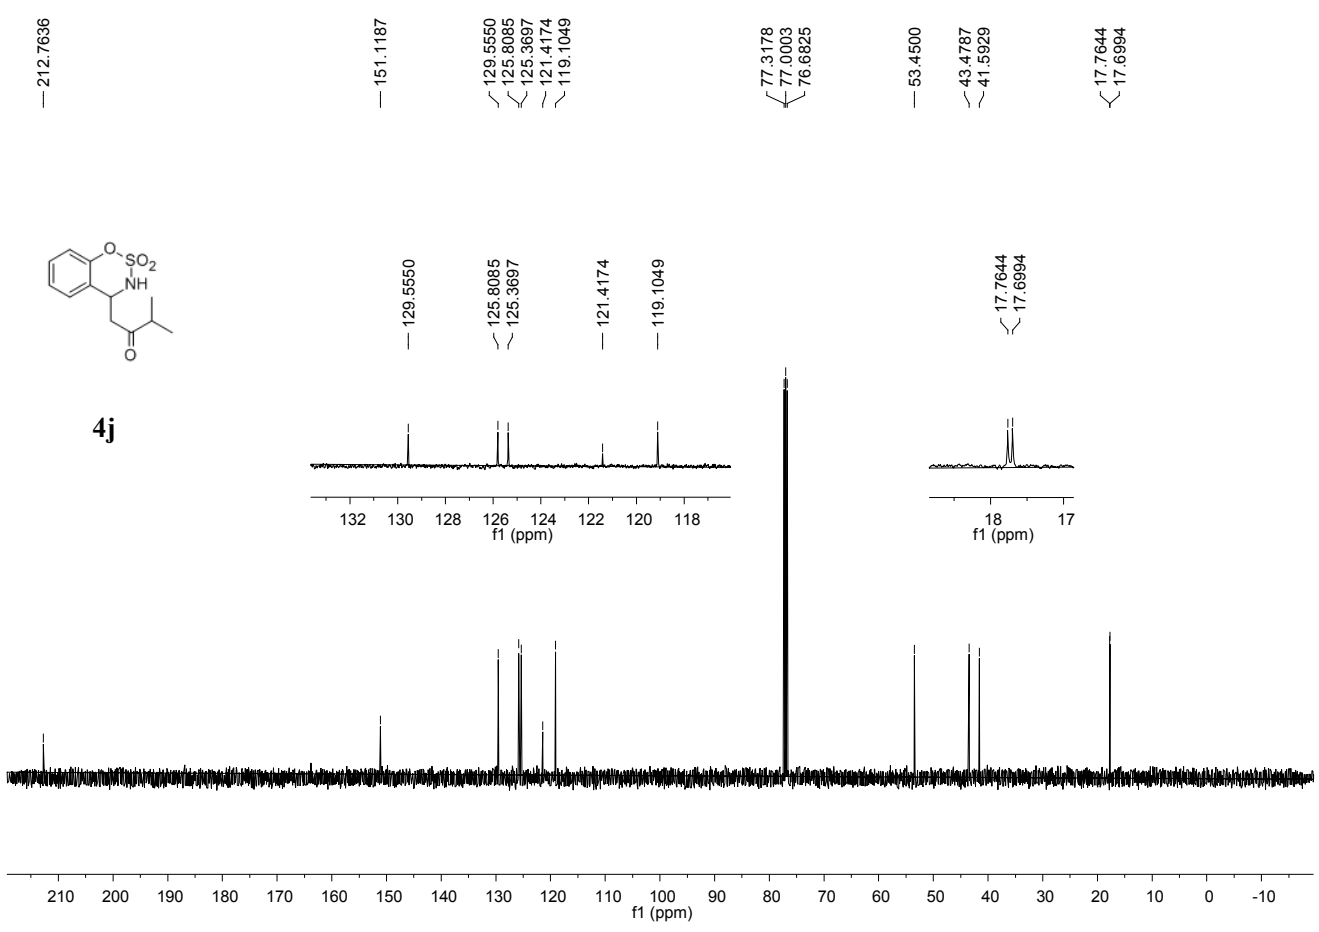

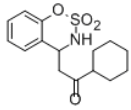

4k

7.3110  
7.3095  
7.2911  
7.2725  
7.2707  
7.2600  
7.1758  
7.1734  
7.1563  
7.1545  
7.1381  
7.1357  
7.0916  
7.0727  
7.0132  
6.9925  
— 5.9236  
— 5.1985  
— 5.1893  
3.6999  
3.6810  
3.6545  
3.6356  
2.9376  
2.9279  
2.8922  
2.8825  
2.3800  
2.3716  
2.3632  
2.3440  
1.8455  
1.7845  
1.7623  
1.7551  
1.3560  
1.3499  
1.3226  
1.2871  
1.2604  
1.2501  
1.2392  
1.2135  
1.1831  
1.1537

7.3110  
7.3095  
7.2911  
7.2725  
7.2707  
7.2600  
7.1758  
7.1734  
7.1563  
7.1545  
7.1381  
7.1357  
— 7.0916  
— 7.0727  
— 7.0132  
— 6.9925

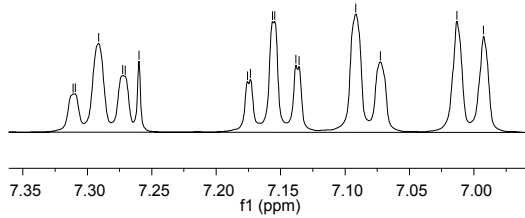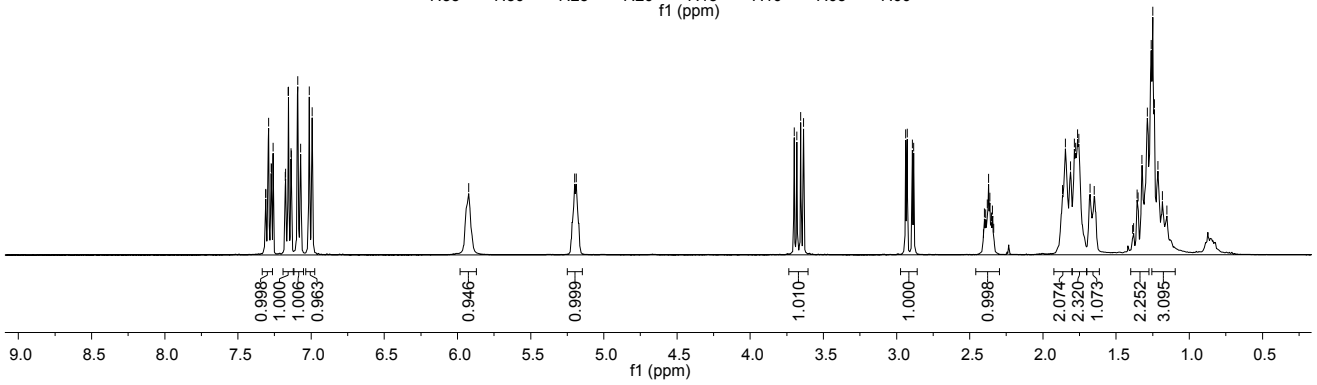

—212.0971

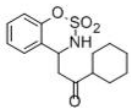

4k

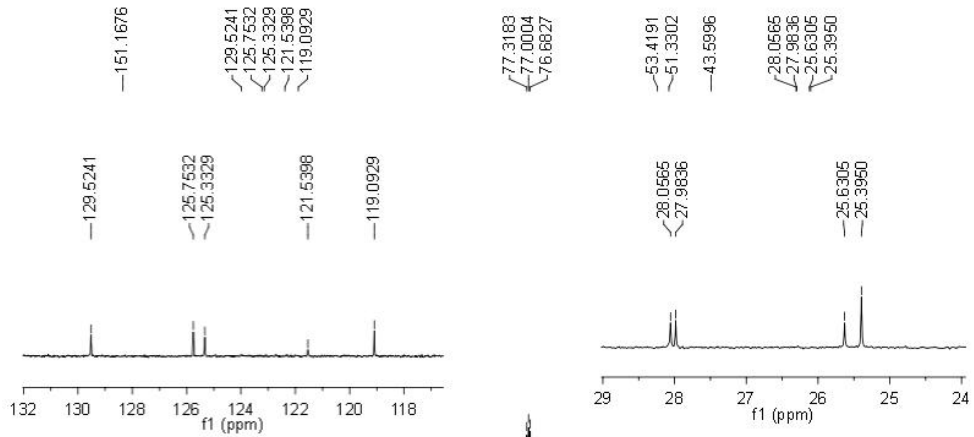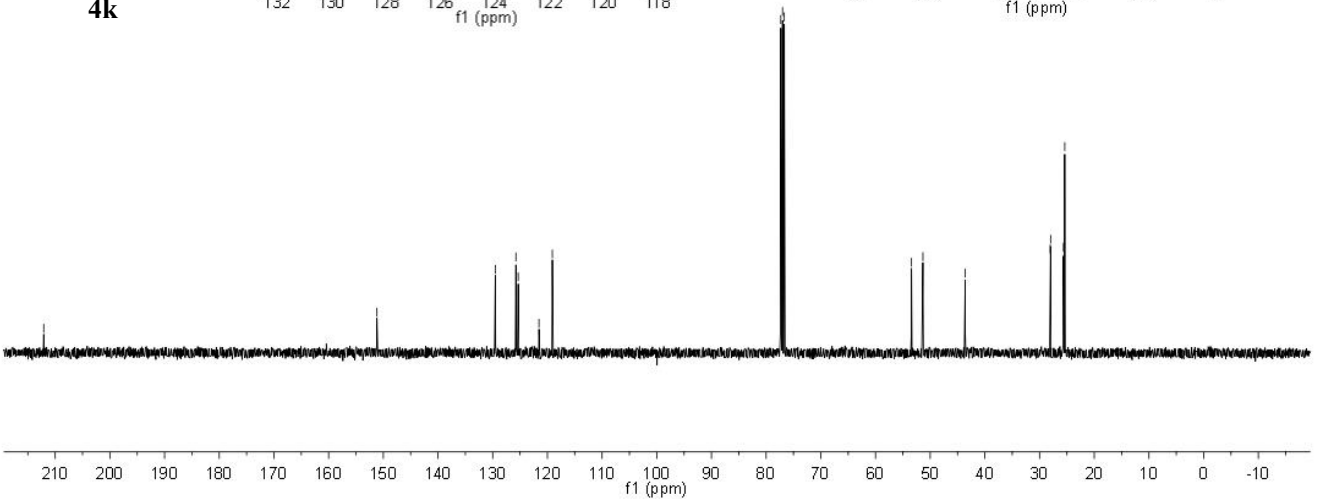

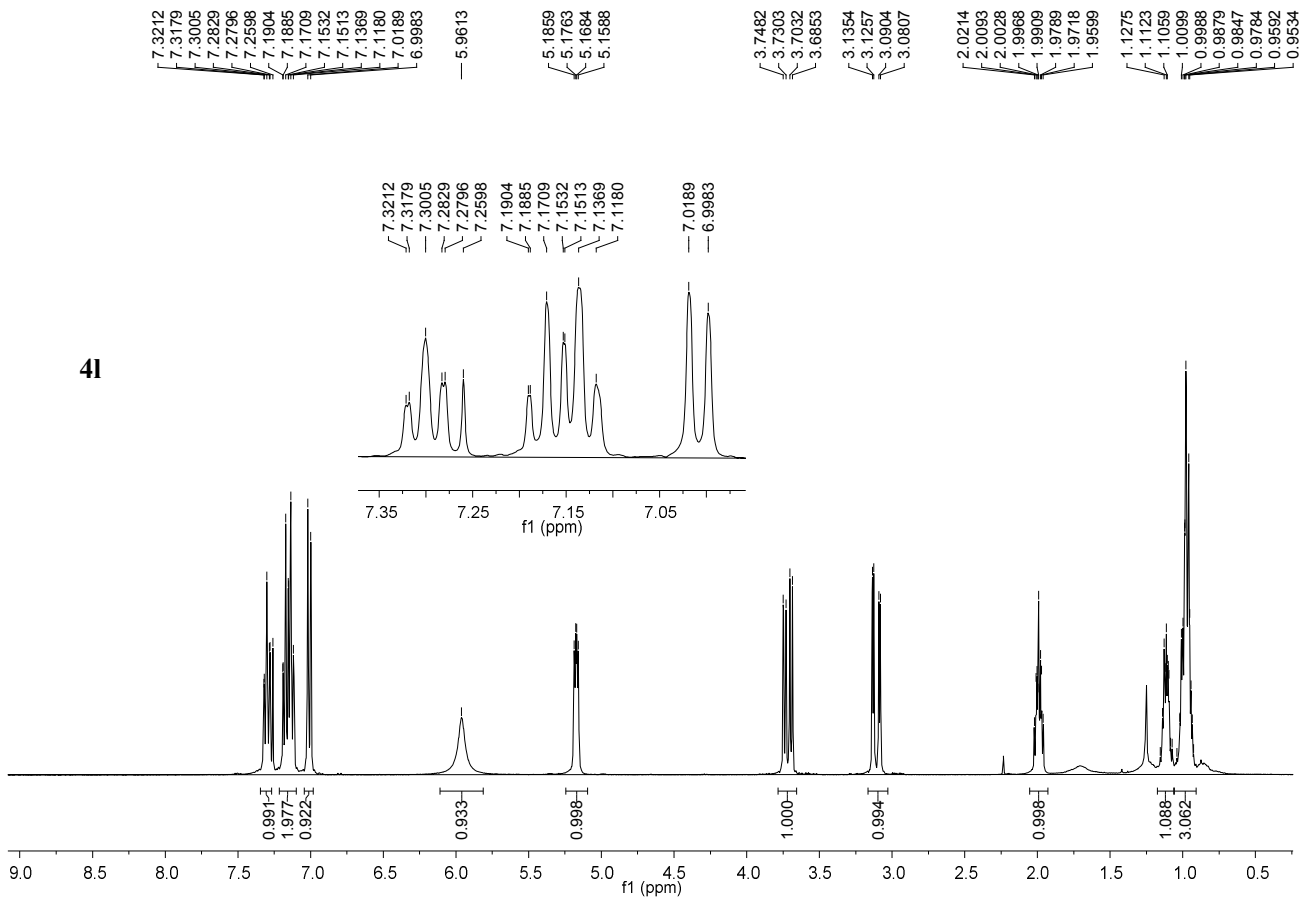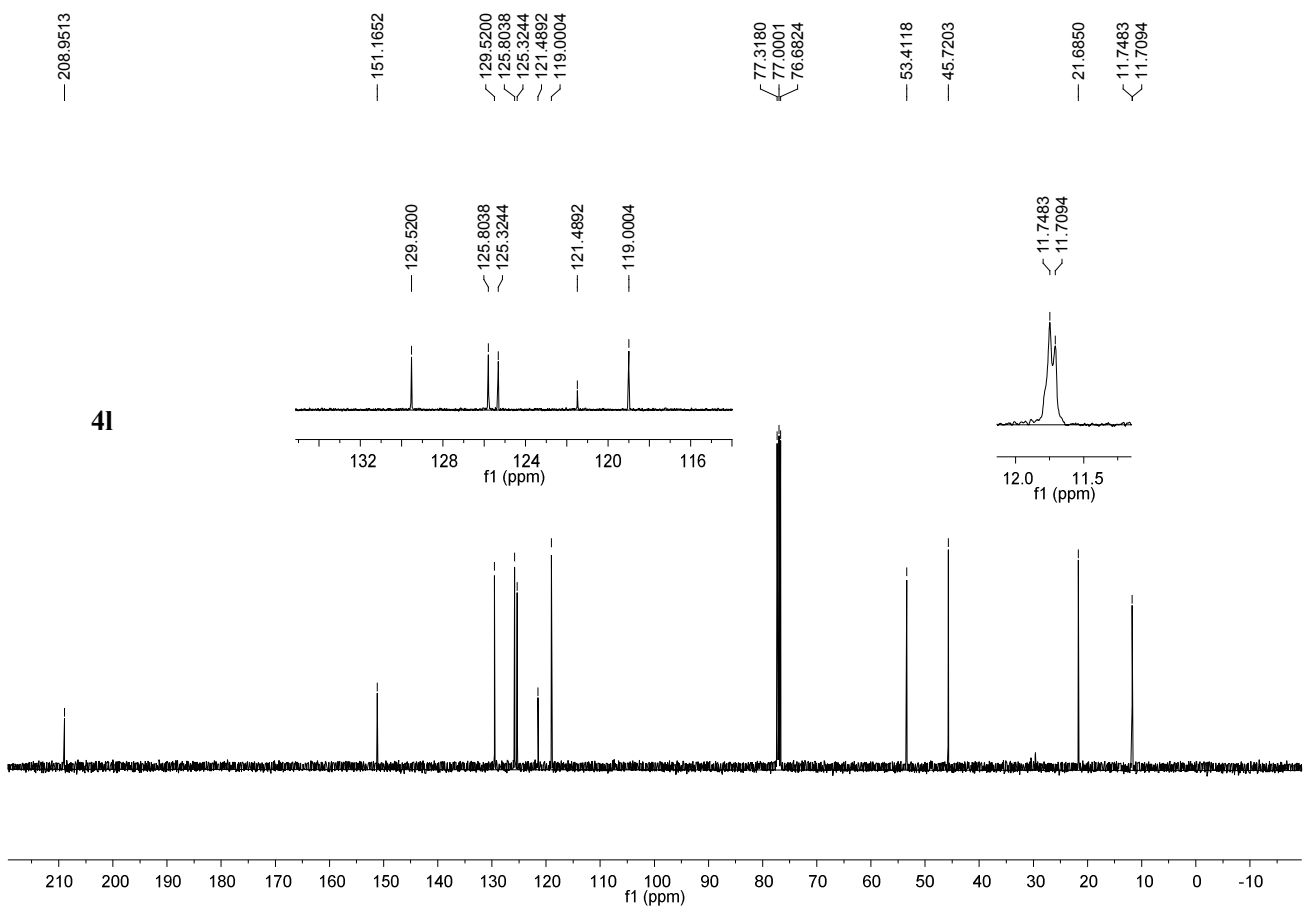

### HPLC for racemic and pure enantioenriched sample 2a

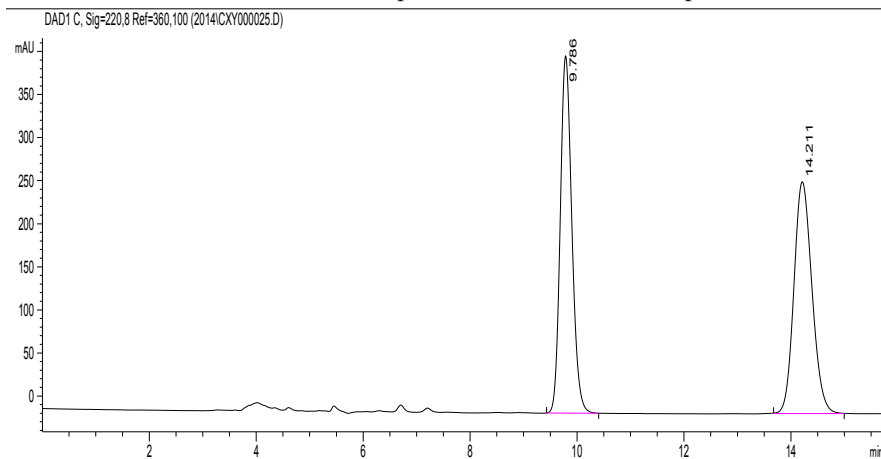

信号 2: DAD1 C, Sig=220,8 Ref=360,100

| 峰 # | 保留时间 [min] | 类型 | 峰宽 [min] | 峰面积 [mAU*s] | 峰高 [mAU]  | 峰面积 %   |
|-----|------------|----|----------|-------------|-----------|---------|
| 1   | 9.786      | BB | 0.2314   | 6234.88721  | 414.71365 | 49.7203 |
| 2   | 14.211     | BB | 0.3633   | 6305.02637  | 269.11935 | 50.2797 |

总量 : 1.25399e4 683.83301

### HPLC for racemic and pure enantioenriched sample 2b

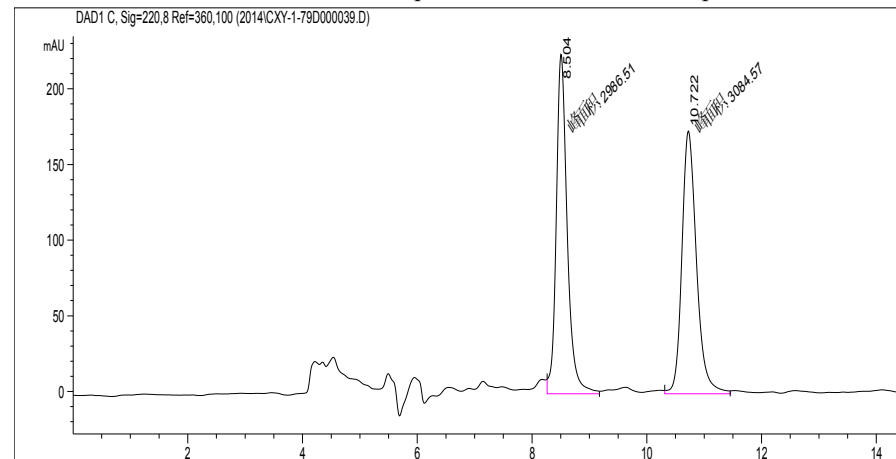

信号 2: DAD1 C, Sig=220,8 Ref=360,100

| 峰 # | 保留时间 [min] | 类型 | 峰宽 [min] | 峰面积 [mAU*s] | 峰高 [mAU]  | 峰面积 %   |
|-----|------------|----|----------|-------------|-----------|---------|
| 1   | 8.504      | MM | 0.2216   | 2986.50659  | 224.65845 | 49.1924 |
| 2   | 10.722     | MM | 0.2957   | 3084.57227  | 173.87868 | 50.8076 |

总量 : 6071.07886 398.53712

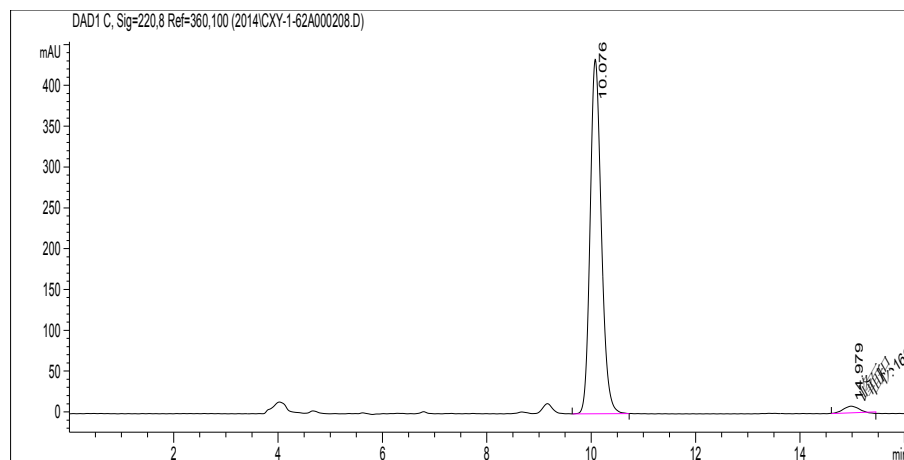

信号 2: DAD1 C, Sig=220,8 Ref=360,100

| 峰 # | 保留时间 [min] | 类型 | 峰宽 [min] | 峰面积 [mAU*s] | 峰高 [mAU]  | 峰面积 %   |
|-----|------------|----|----------|-------------|-----------|---------|
| 1   | 10.076     | VB | 0.2298   | 6467.71094  | 434.06915 | 97.9809 |
| 2   | 14.979     | MM | 0.3062   | 133.28027   | 7.25523   | 2.0191  |

总量 : 6600.99121 441.32438

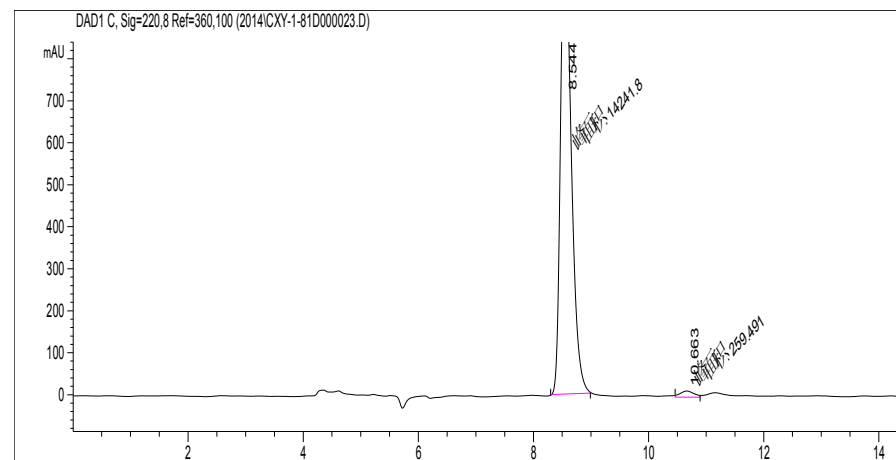

信号 2: DAD1 C, Sig=220,8 Ref=360,100

| 峰 # | 保留时间 [min] | 类型 | 峰宽 [min] | 峰面积 [mAU*s] | 峰高 [mAU]   | 峰面积 %   |
|-----|------------|----|----------|-------------|------------|---------|
| 1   | 8.544      | MM | 0.2199   | 1.42418e4   | 1079.23364 | 98.2106 |
| 2   | 10.663     | MM | 0.2863   | 259.49130   | 15.10346   | 1.7894  |

总量 : 1.45013e4 1094.33711

### HPLC for racemic and pure enantioenriched sample 2c

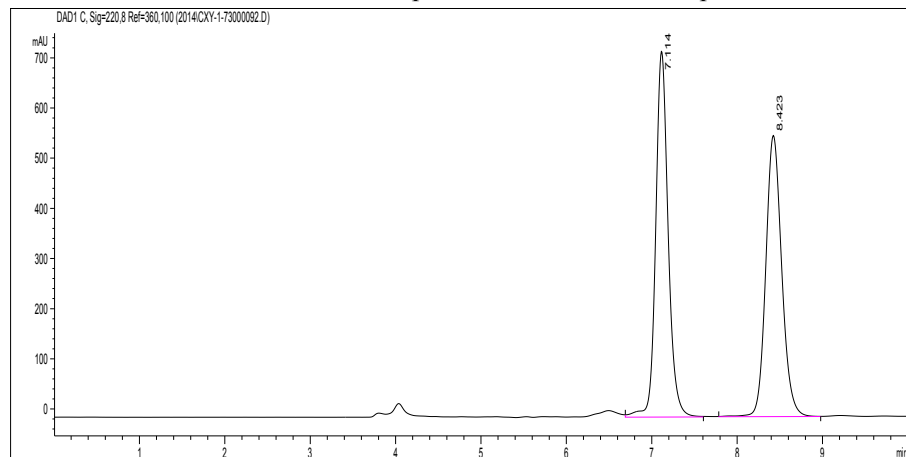

信号 2: DAD1 C, Sig=220,8 Ref=360,100

| 峰 # | 保留时间 [min] | 类型 | 峰宽 [min] | 峰面积 [mAU*s] | 峰高 [mAU]  | 峰面积 %   |
|-----|------------|----|----------|-------------|-----------|---------|
| 1   | 7.114      | VB | 0.1544   | 7400.45898  | 729.31238 | 50.3926 |
| 2   | 8.423      | BB | 0.1996   | 7285.16162  | 560.66992 | 49.6074 |

总量 : 1.46856e4 1289.98230

### HPLC for racemic and pure enantioenriched sample 2d

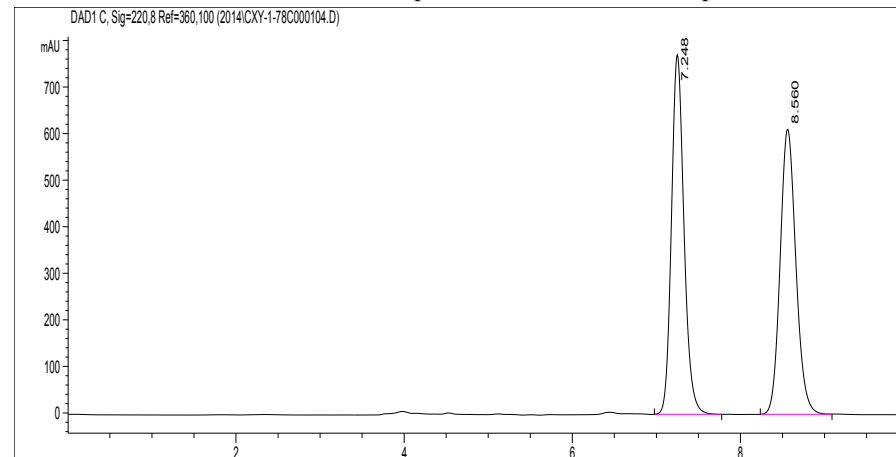

信号 2: DAD1 C, Sig=220,8 Ref=360,100

| 峰 # | 保留时间 [min] | 类型 | 峰宽 [min] | 峰面积 [mAU*s] | 峰高 [mAU]  | 峰面积 %   |
|-----|------------|----|----------|-------------|-----------|---------|
| 1   | 7.248      | BB | 0.1590   | 8012.18311  | 772.50812 | 50.0890 |
| 2   | 8.560      | BB | 0.2000   | 7983.71680  | 612.90918 | 49.9110 |

总量 : 1.59959e4 1385.41730

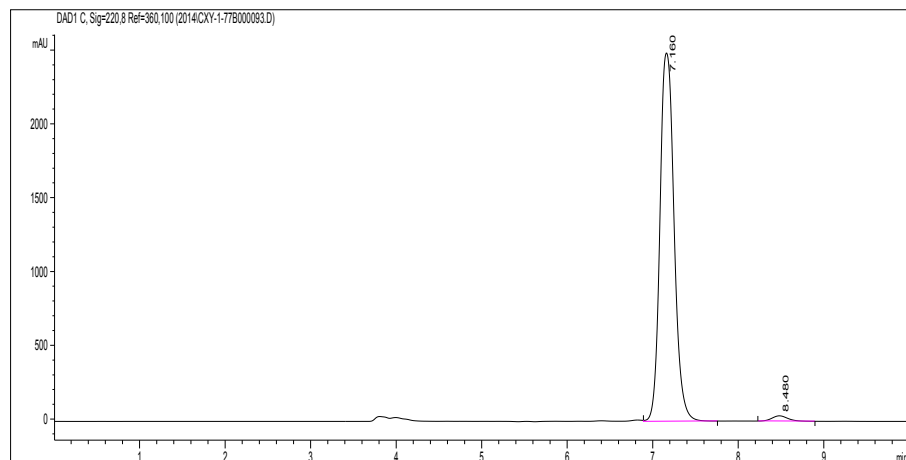

信号 2: DAD1 C, Sig=220,8 Ref=360,100

| 峰 # | 保留时间 [min] | 类型 | 峰宽 [min] | 峰面积 [mAU*s] | 峰高 [mAU]   | 峰面积 %   |
|-----|------------|----|----------|-------------|------------|---------|
| 1   | 7.160      | VB | 0.1798   | 2.86179e4   | 2495.20410 | 98.3903 |
| 2   | 8.480      | BB | 0.1989   | 468.20709   | 36.20536   | 1.6097  |

总量 : 2.90861e4 2531.40947

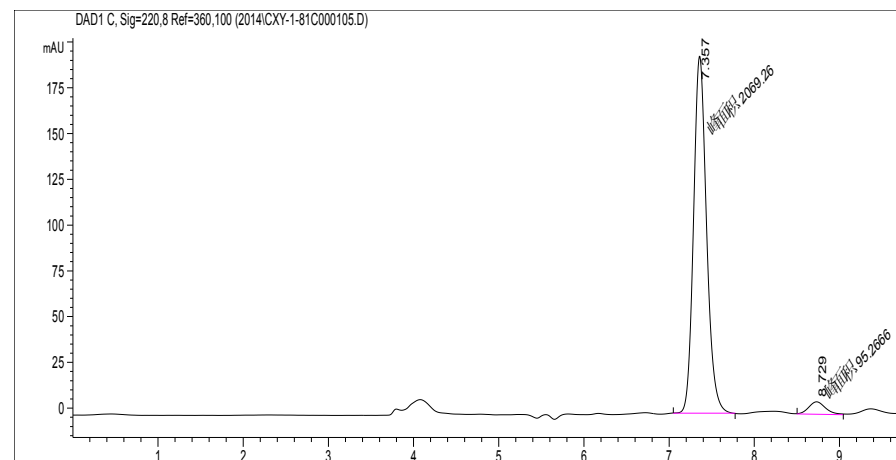

信号 2: DAD1 C, Sig=220,8 Ref=360,100

| 峰 # | 保留时间 [min] | 类型 | 峰宽 [min] | 峰面积 [mAU*s] | 峰高 [mAU]  | 峰面积 %   |
|-----|------------|----|----------|-------------|-----------|---------|
| 1   | 7.357      | VB | 0.1735   | 2256.32910  | 197.16563 | 95.4992 |
| 2   | 8.729      | VB | 0.2222   | 106.33968   | 7.20407   | 4.5008  |

总量 : 2362.66878 204.36970

### HPLC for racemic and pure enantioenriched sample 2e

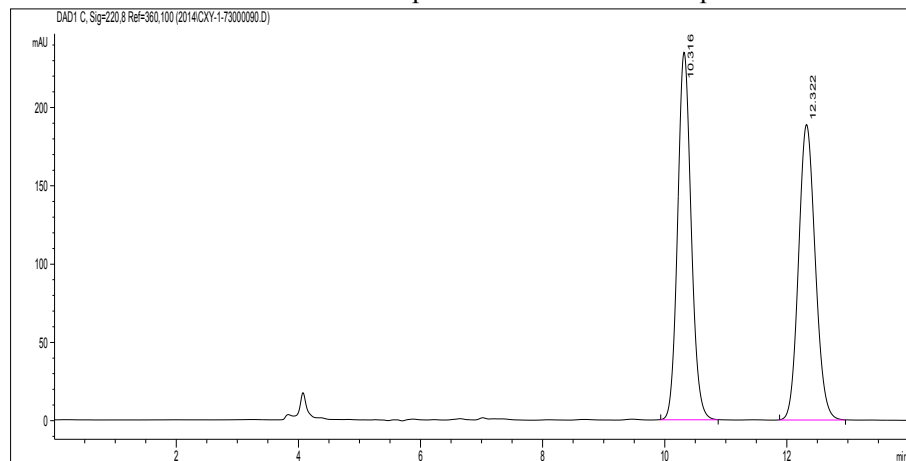

信号 2: DAD1 C, Sig=220,8 Ref=360,100

| 峰 # | 保留时间 [min] | 类型 | 峰宽 [min] | 峰面积 [mAU*s] | 峰高 [mAU]  | 峰面积 %   |
|-----|------------|----|----------|-------------|-----------|---------|
| 1   | 10.316     | BB | 0.2360   | 3624.50977  | 234.90344 | 50.2459 |
| 2   | 12.322     | BB | 0.2958   | 3589.02783  | 186.74948 | 49.7541 |

总量 : 7213.53760 423.65292

### HPLC for racemic and pure enantioenriched sample 2f

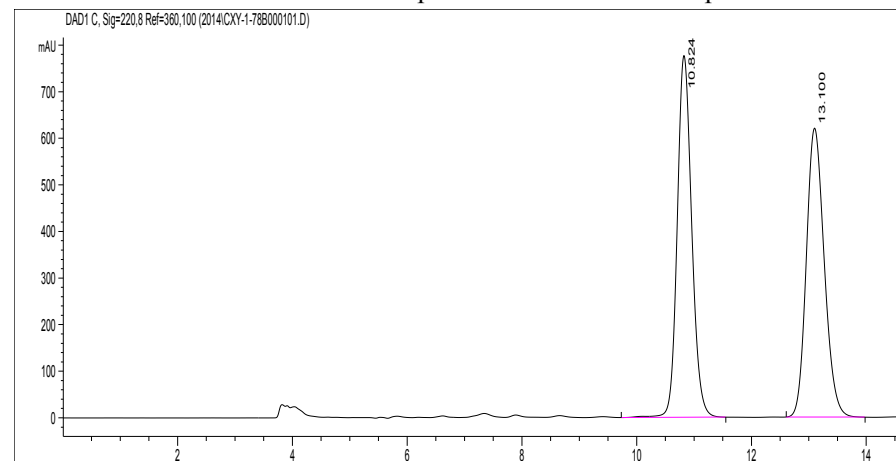

信号 2: DAD1 C, Sig=220,8 Ref=360,100

| 峰 # | 保留时间 [min] | 类型 | 峰宽 [min] | 峰面积 [mAU*s] | 峰高 [mAU]  | 峰面积 %   |
|-----|------------|----|----------|-------------|-----------|---------|
| 1   | 10.824     | VB | 0.2686   | 1.36193e4   | 776.67523 | 50.2752 |
| 2   | 13.100     | BB | 0.3354   | 1.34702e4   | 620.27850 | 49.7248 |

总量 : 2.70895e4 1396.95374

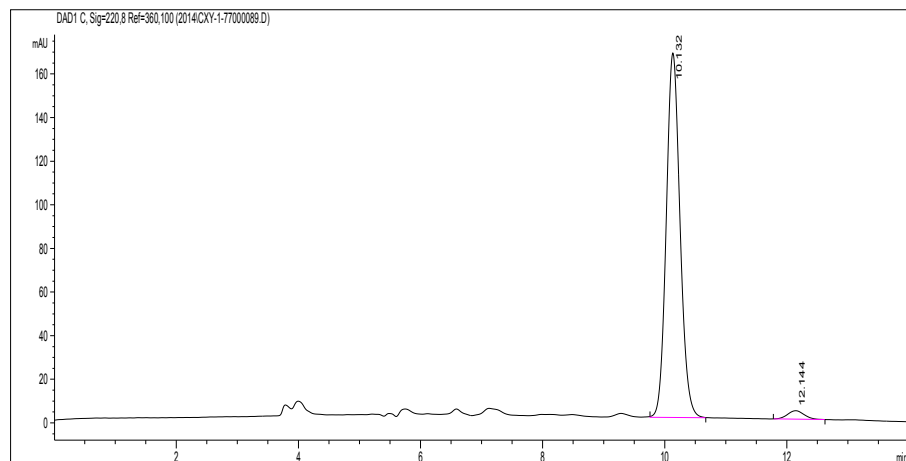

信号 2: DAD1 C, Sig=220,8 Ref=360,100

| 峰 # | 保留时间 [min] | 类型 | 峰宽 [min] | 峰面积 [mAU*s] | 峰高 [mAU]  | 峰面积 %   |
|-----|------------|----|----------|-------------|-----------|---------|
| 1   | 10.132     | BB | 0.2408   | 2618.16797  | 167.10361 | 97.2569 |
| 2   | 12.144     | BB | 0.2915   | 73.84595    | 3.89032   | 2.7431  |

总量 : 2692.01392 170.99393

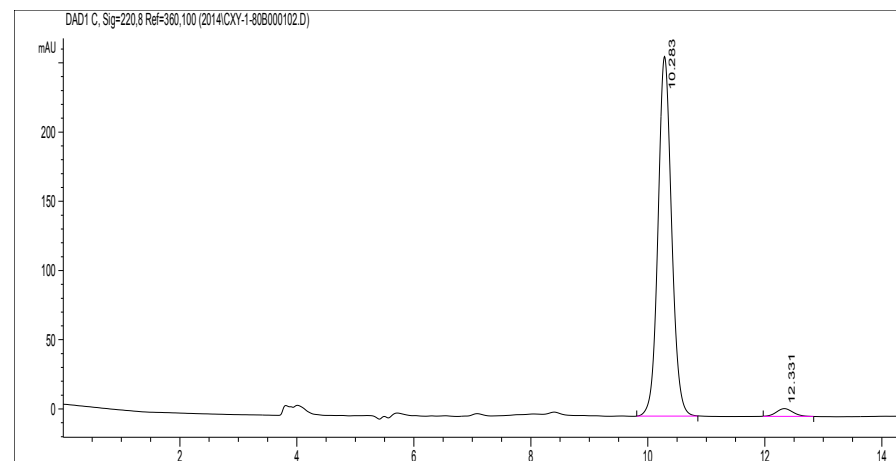

信号 2: DAD1 C, Sig=220,8 Ref=360,100

| 峰 # | 保留时间 [min] | 类型 | 峰宽 [min] | 峰面积 [mAU*s] | 峰高 [mAU]  | 峰面积 %   |
|-----|------------|----|----------|-------------|-----------|---------|
| 1   | 10.283     | BB | 0.2483   | 4193.51563  | 259.80078 | 97.3584 |
| 2   | 12.331     | BB | 0.3043   | 113.78202   | 5.66606   | 2.6416  |

总量 : 4307.29765 265.46684



### HPLC for racemic and pure enantioenriched sample 2g

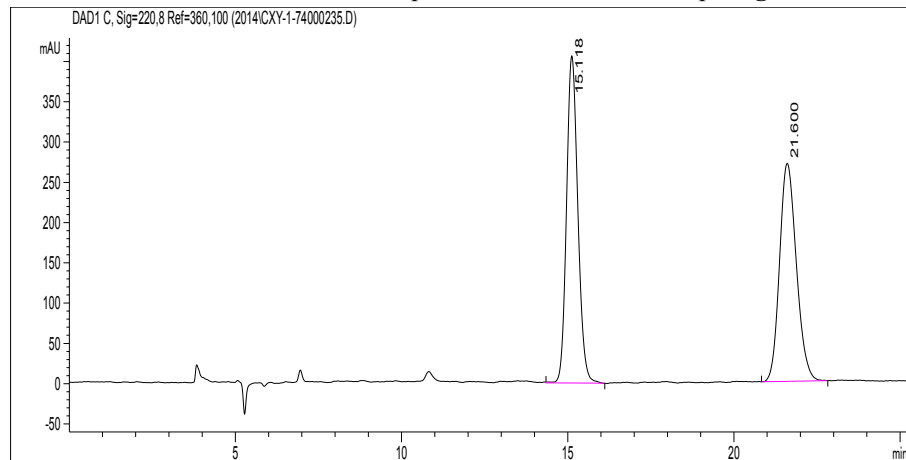

信号 2: DAD1 C, Sig=220,8 Ref=360,100

| 峰 # | 保留时间 [min] | 类型 | 峰宽 [min] | 峰面积 [mAU*s] | 峰高 [mAU]  | 峰面积 %   |
|-----|------------|----|----------|-------------|-----------|---------|
| 1   | 15.118     | VB | 0.3643   | 9625.43945  | 406.41882 | 50.2909 |
| 2   | 21.600     | VB | 0.5441   | 9514.09473  | 270.69171 | 49.7091 |

总量 : 1.91395e4 677.11053

### HPLC for racemic and pure enantioenriched sample 2h

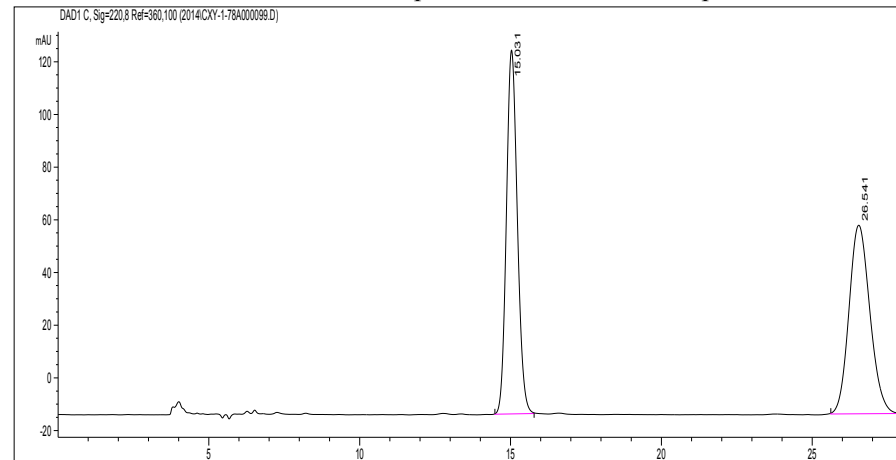

信号 2: DAD1 C, Sig=220,8 Ref=360,100

| 峰 # | 保留时间 [min] | 类型 | 峰宽 [min] | 峰面积 [mAU*s] | 峰高 [mAU]  | 峰面积 %   |
|-----|------------|----|----------|-------------|-----------|---------|
| 1   | 15.031     | BB | 0.3899   | 3479.35278  | 138.09999 | 50.1868 |
| 2   | 26.541     | BB | 0.7484   | 3453.45459  | 71.63691  | 49.8132 |

总量 : 6932.80737 209.73690

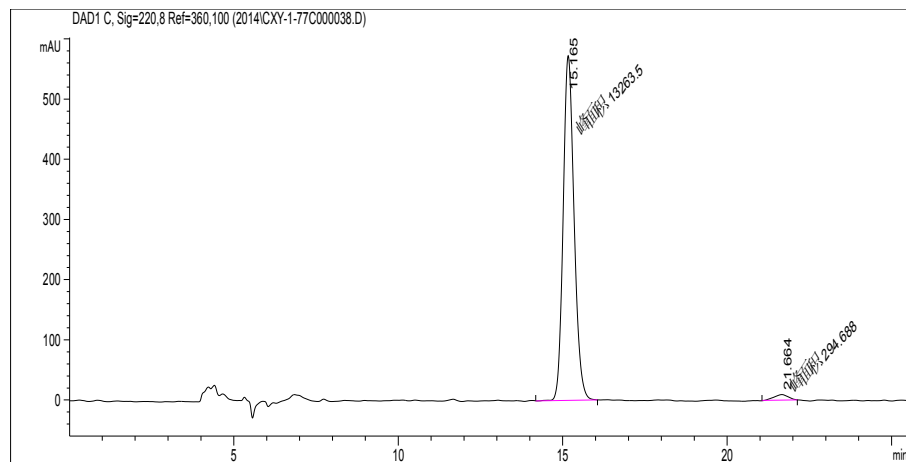

信号 2: DAD1 C, Sig=220,8 Ref=360,100

| 峰 # | 保留时间 [min] | 类型 | 峰宽 [min] | 峰面积 [mAU*s] | 峰高 [mAU]  | 峰面积 %   |
|-----|------------|----|----------|-------------|-----------|---------|
| 1   | 15.165     | MM | 0.3857   | 1.32635e4   | 573.10760 | 97.8265 |
| 2   | 21.664     | MM | 0.5167   | 294.68802   | 9.50520   | 2.1735  |

总量 : 1.35582e4 582.61280

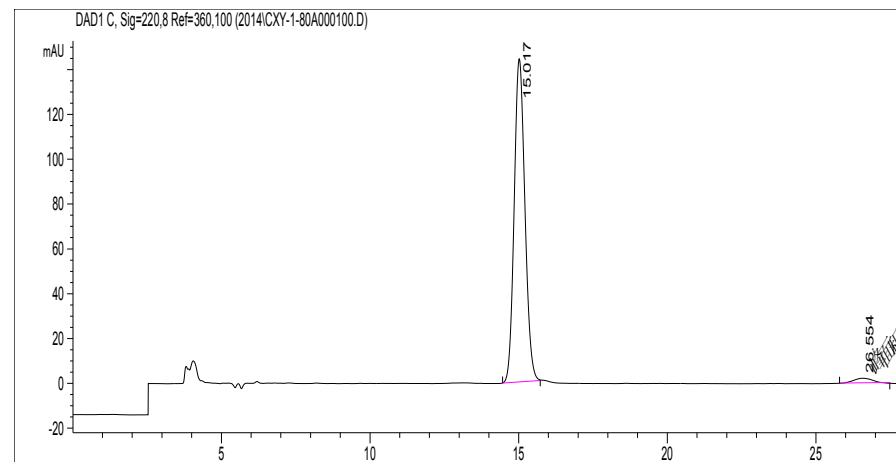

信号 2: DAD1 C, Sig=220,8 Ref=360,100

| 峰 # | 保留时间 [min] | 类型 | 峰宽 [min] | 峰面积 [mAU*s] | 峰高 [mAU]  | 峰面积 %   |
|-----|------------|----|----------|-------------|-----------|---------|
| 1   | 15.017     | BB | 0.3904   | 3613.97607  | 144.21667 | 97.5697 |
| 2   | 26.554     | MM | 0.7112   | 90.01949    | 2.10960   | 2.4303  |

总量 : 3703.99556 146.32627

### HPLC for racemic and pure enantioenriched sample 2i

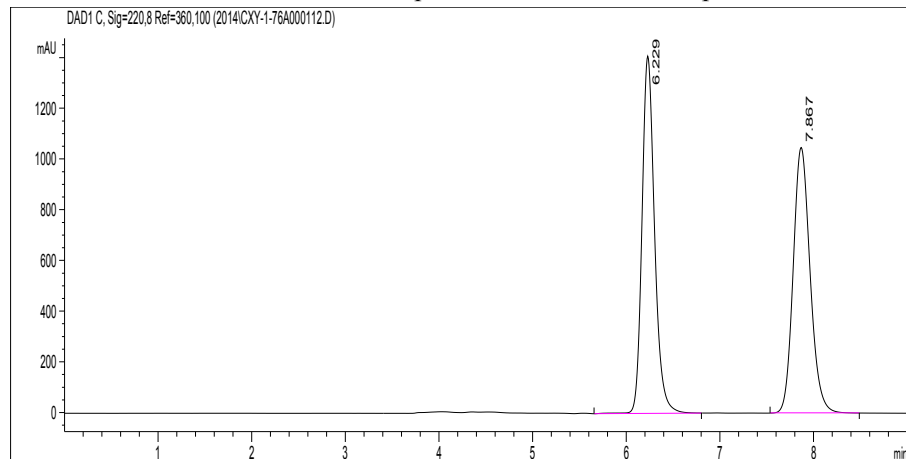

信号 2: DAD1 C, Sig=220,8 Ref=360,100

| 峰 # | 保留时间 [min] | 类型 | 峰宽 [min] | 峰面积 [mAU*s] | 峰高 [mAU]   | 峰面积 %   |
|-----|------------|----|----------|-------------|------------|---------|
| 1   | 6.229      | VB | 0.1432   | 1.31888e4   | 1408.87585 | 50.0834 |
| 2   | 7.867      | BB | 0.1944   | 1.31448e4   | 1047.55847 | 49.9166 |

总量 : 2.63336e4 2456.43433

### HPLC for racemic and pure enantioenriched sample 2j

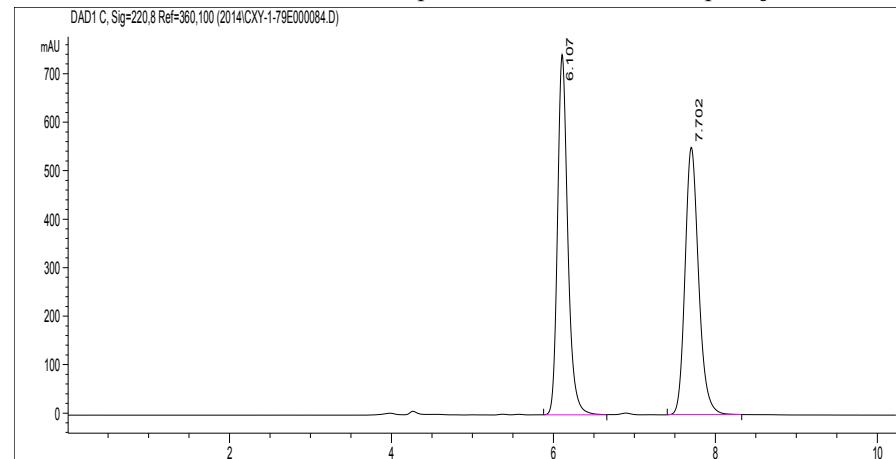

信号 2: DAD1 C, Sig=220,8 Ref=360,100

| 峰 # | 保留时间 [min] | 类型 | 峰宽 [min] | 峰面积 [mAU*s] | 峰高 [mAU]  | 峰面积 %   |
|-----|------------|----|----------|-------------|-----------|---------|
| 1   | 6.107      | BB | 0.1325   | 6528.36963  | 742.84656 | 50.3988 |
| 2   | 7.702      | BB | 0.1778   | 6425.06152  | 551.78943 | 49.6012 |

总量 : 1.29534e4 1294.63599

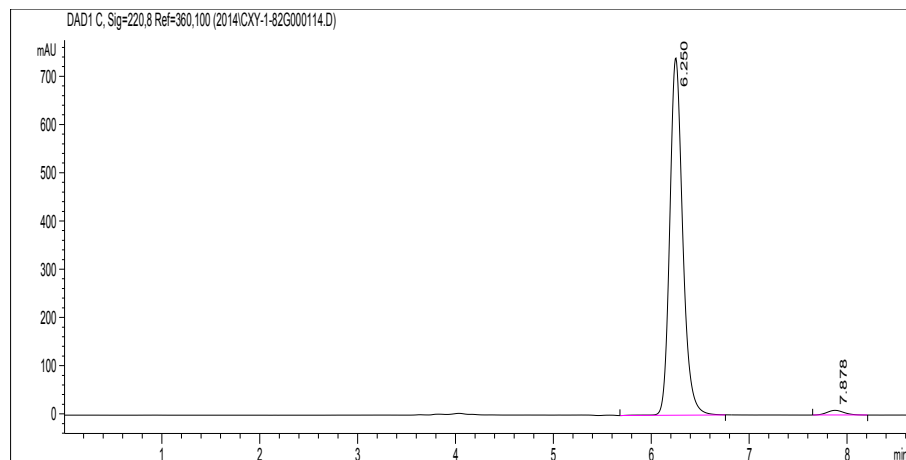

信号 2: DAD1 C, Sig=220,8 Ref=360,100

| 峰 # | 保留时间 [min] | 类型 | 峰宽 [min] | 峰面积 [mAU*s] | 峰高 [mAU]  | 峰面积 %   |
|-----|------------|----|----------|-------------|-----------|---------|
| 1   | 6.250      | VB | 0.1391   | 6802.08105  | 741.24585 | 98.2709 |
| 2   | 7.878      | BB | 0.1891   | 119.68291   | 9.76028   | 1.7291  |

总量 : 6921.76397 751.00613

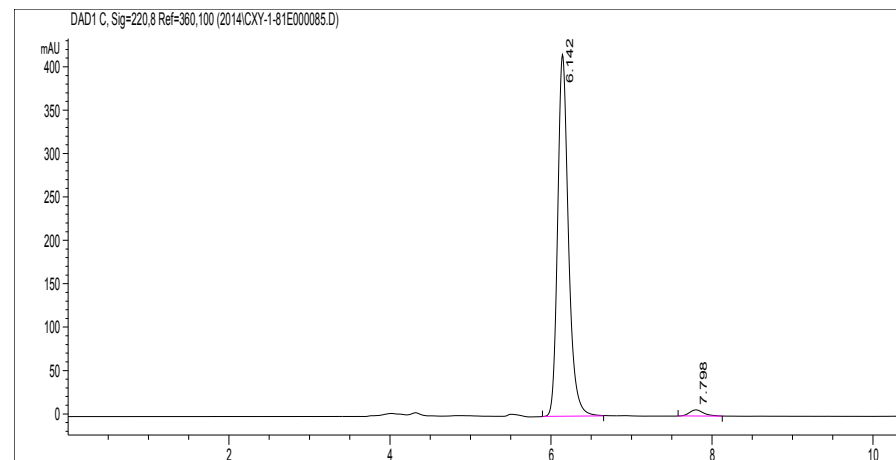

信号 2: DAD1 C, Sig=220,8 Ref=360,100

| 峰 # | 保留时间 [min] | 类型 | 峰宽 [min] | 峰面积 [mAU*s] | 峰高 [mAU]  | 峰面积 %   |
|-----|------------|----|----------|-------------|-----------|---------|
| 1   | 6.142      | BB | 0.1428   | 3888.69312  | 416.97598 | 97.7505 |
| 2   | 7.798      | BB | 0.1896   | 89.49083    | 7.17051   | 2.2495  |

总量 : 3978.18394 424.14649

### HPLC for racemic and pure enantioenriched sample 2k

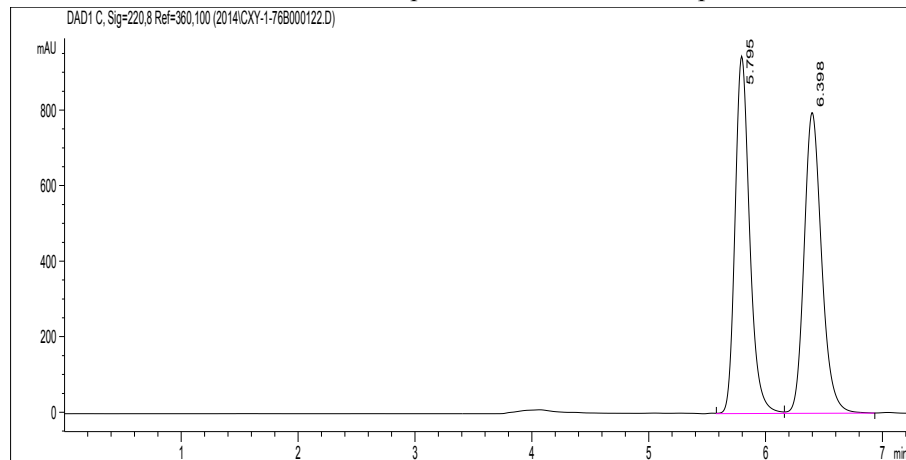

信号 2: DAD1 C, Sig=220,8 Ref=360,100

| 峰 # | 保留时间 [min] | 类型 | 峰宽 [min] | 峰面积 [mAU*s] | 峰高 [mAU]  | 峰面积 %   |
|-----|------------|----|----------|-------------|-----------|---------|
| 1   | 5.795      | VV | 0.1311   | 8201.44531  | 946.36481 | 49.6127 |
| 2   | 6.398      | VV | 0.1619   | 8329.48047  | 797.23413 | 50.3873 |

总量: 1.65309e4 1743.59894

### HPLC for racemic and pure enantioenriched sample 4a

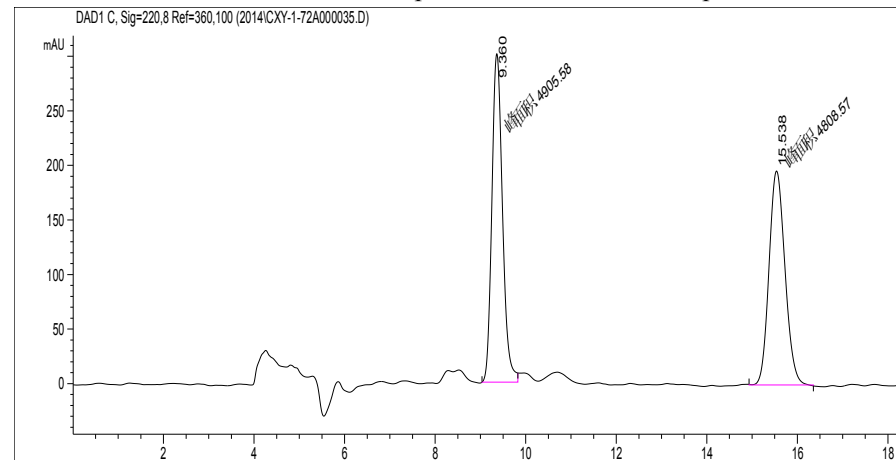

信号 2: DAD1 C, Sig=220,8 Ref=360,100

| 峰 # | 保留时间 [min] | 类型 | 峰宽 [min] | 峰面积 [mAU*s] | 峰高 [mAU]  | 峰面积 %   |
|-----|------------|----|----------|-------------|-----------|---------|
| 1   | 9.360      | MM | 0.2715   | 4905.58496  | 301.10931 | 50.4993 |
| 2   | 15.538     | MM | 0.4082   | 4808.57031  | 196.32689 | 49.5007 |

总量: 9714.15527 497.43620

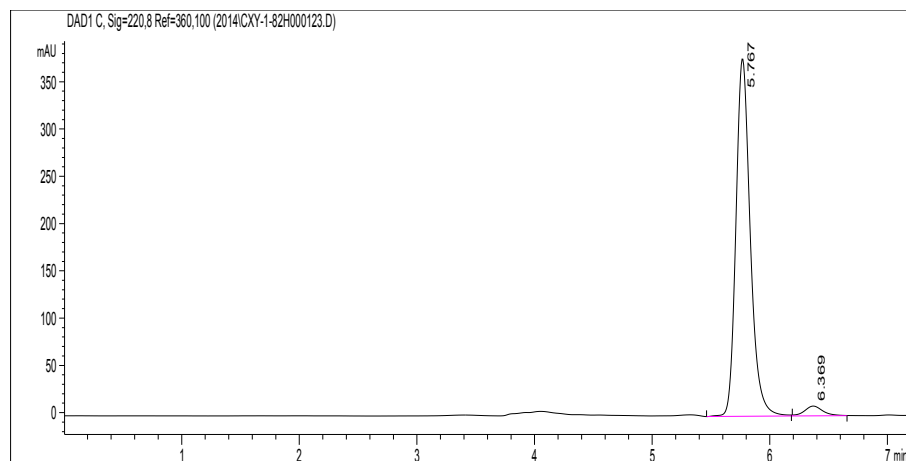

信号 2: DAD1 C, Sig=220,8 Ref=360,100

| 峰 # | 保留时间 [min] | 类型 | 峰宽 [min] | 峰面积 [mAU*s] | 峰高 [mAU]  | 峰面积 %   |
|-----|------------|----|----------|-------------|-----------|---------|
| 1   | 5.767      | VB | 0.1289   | 3209.33057  | 378.65247 | 96.5736 |
| 2   | 6.369      | BB | 0.1634   | 113.86711   | 10.42829  | 3.4264  |

总量: 3323.19768 389.08075

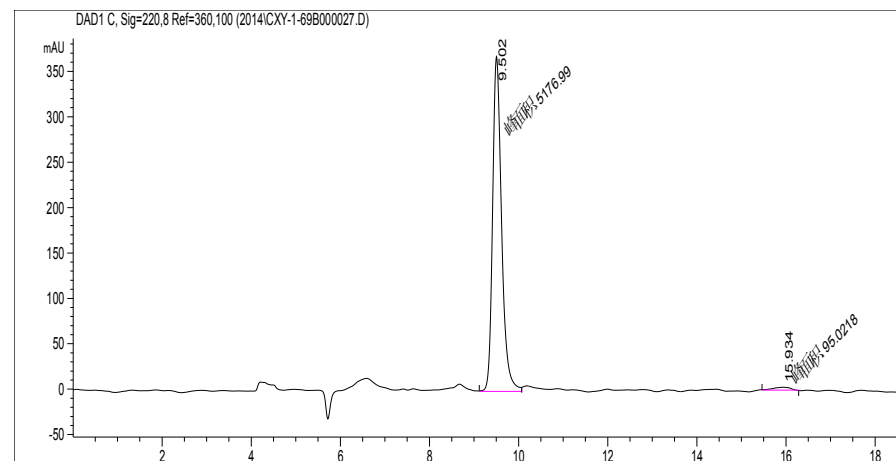

信号 2: DAD1 C, Sig=220,8 Ref=360,100

| 峰 # | 保留时间 [min] | 类型 | 峰宽 [min] | 峰面积 [mAU*s] | 峰高 [mAU]  | 峰面积 %   |
|-----|------------|----|----------|-------------|-----------|---------|
| 1   | 9.502      | MM | 0.2340   | 5176.98926  | 368.71222 | 98.1976 |
| 2   | 15.934     | MM | 0.4683   | 95.02184    | 3.38194   | 1.8024  |

总量: 5272.01109 372.09416

### HPLC for racemic and pure enantioenriched sample 4b

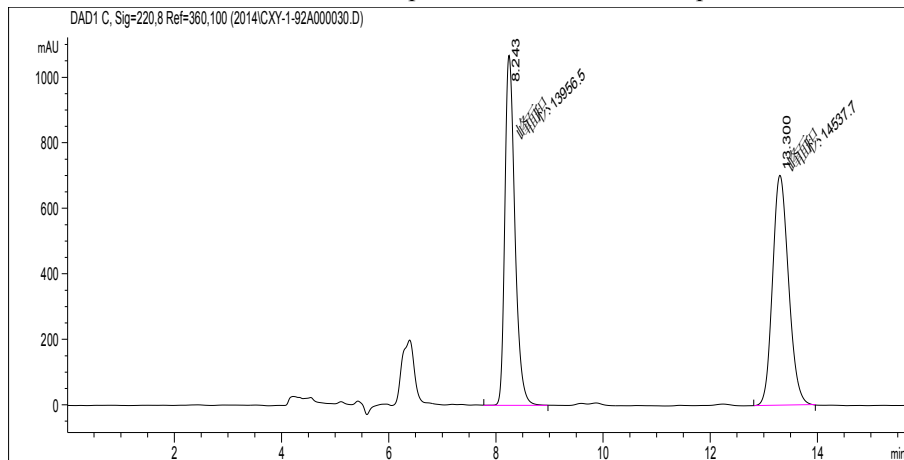

信号 2: DAD1 C, Sig=220,8 Ref=360,100

| 峰 # | 保留时间 [min] | 类型 | 峰宽 [min] | 峰面积 [mAU*s] | 峰高 [mAU]   | 峰面积 %   |
|-----|------------|----|----------|-------------|------------|---------|
| 1   | 8.243      | MM | 0.2175   | 1.39565e4   | 1069.31714 | 48.9801 |
| 2   | 13.300     | MM | 0.3452   | 1.45377e4   | 701.88049  | 51.0199 |

总量 : 2.84942e4 1771.19763

### HPLC for racemic and pure enantioenriched sample 4c

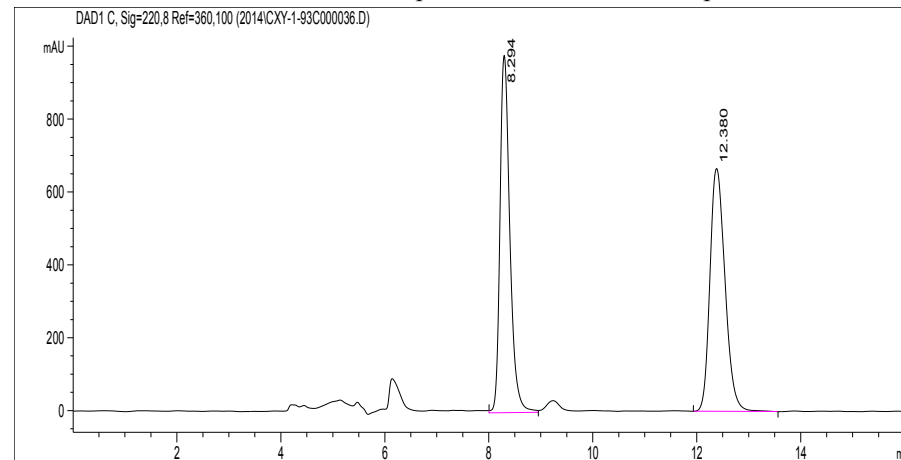

信号 2: DAD1 C, Sig=220,8 Ref=360,100

| 峰 # | 保留时间 [min] | 类型 | 峰宽 [min] | 峰面积 [mAU*s] | 峰高 [mAU]  | 峰面积 %   |
|-----|------------|----|----------|-------------|-----------|---------|
| 1   | 8.294      | BV | 0.2025   | 1.29819e4   | 980.54248 | 49.1016 |
| 2   | 12.380     | VB | 0.3216   | 1.34569e4   | 666.39166 | 50.8984 |

总量 : 2.64388e4 1646.93414

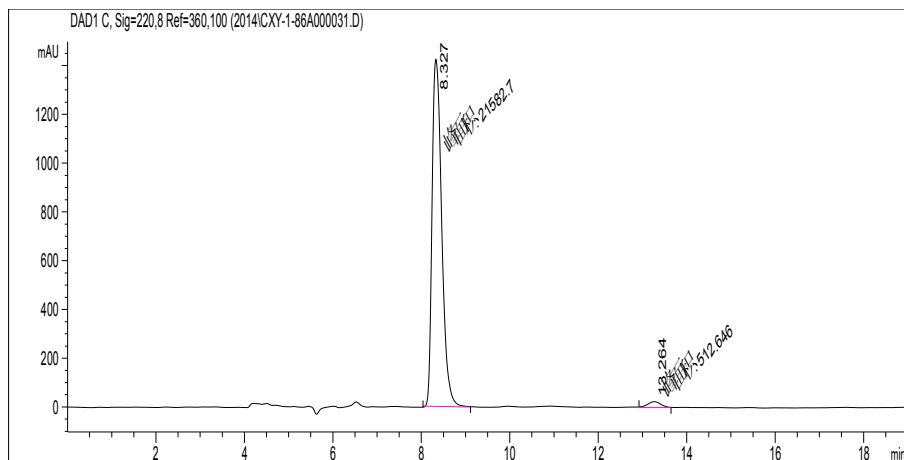

信号 2: DAD1 C, Sig=220,8 Ref=360,100

| 峰 # | 保留时间 [min] | 类型 | 峰宽 [min] | 峰面积 [mAU*s] | 峰高 [mAU]   | 峰面积 %   |
|-----|------------|----|----------|-------------|------------|---------|
| 1   | 8.327      | MM | 0.2527   | 2.15827e4   | 1423.50037 | 97.6798 |
| 2   | 13.264     | MM | 0.3532   | 512.64600   | 24.18923   | 2.3202  |

总量 : 2.20954e4 1447.68959

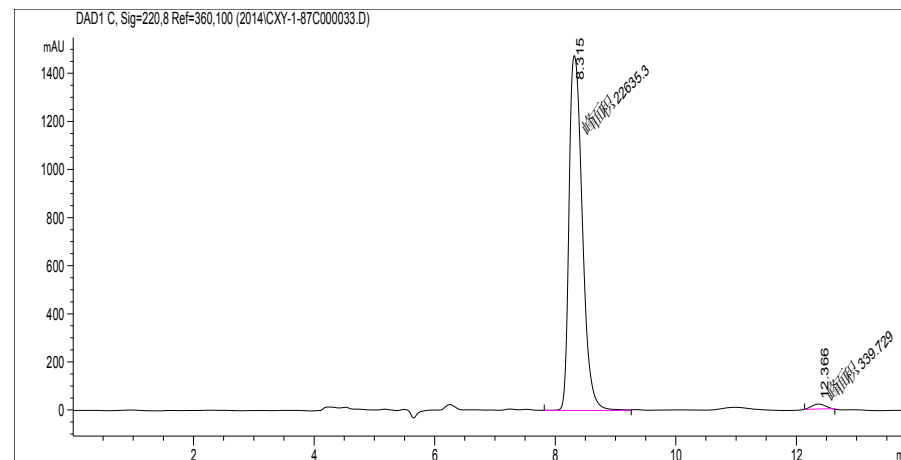

信号 2: DAD1 C, Sig=220,8 Ref=360,100

| 峰 # | 保留时间 [min] | 类型 | 峰宽 [min] | 峰面积 [mAU*s] | 峰高 [mAU]   | 峰面积 %   |
|-----|------------|----|----------|-------------|------------|---------|
| 1   | 8.315      | MM | 0.2556   | 2.26353e4   | 1476.19519 | 98.5213 |
| 2   | 12.366     | MM | 0.2645   | 339.72885   | 21.40765   | 1.4787  |

总量 : 2.29750e4 1497.60284

### HPLC for racemic and pure enantioenriched sample 4d

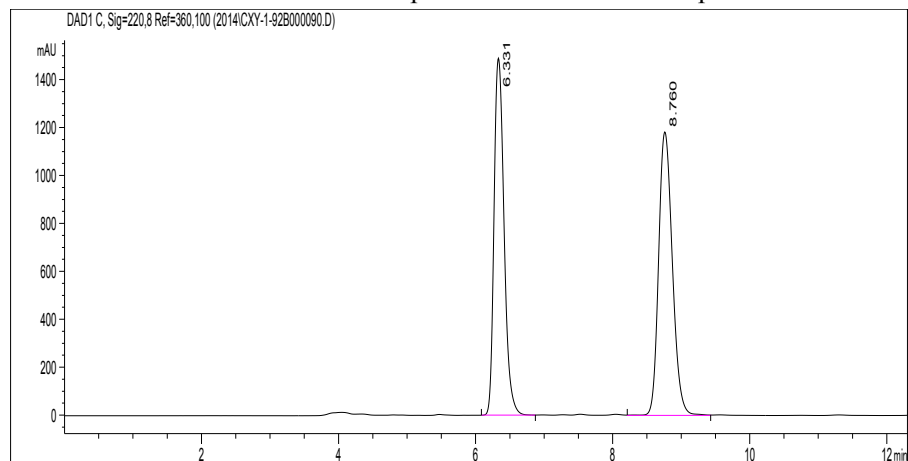

信号 2: DAD1 C, Sig=220,8 Ref=360,100

| 峰 # | 保留时间 [min] | 类型 | 峰宽 [min] | 峰面积 [mAU*s] | 峰高 [mAU]   | 峰面积 %   |
|-----|------------|----|----------|-------------|------------|---------|
| 1   | 6.331      | BB | 0.1589   | 1.51879e4   | 1490.37976 | 47.9665 |
| 2   | 8.760      | VV | 0.2185   | 1.64757e4   | 1182.84839 | 52.0335 |

总量 : 3.16636e4 2673.22815

### HPLC for racemic and pure enantioenriched sample 4e

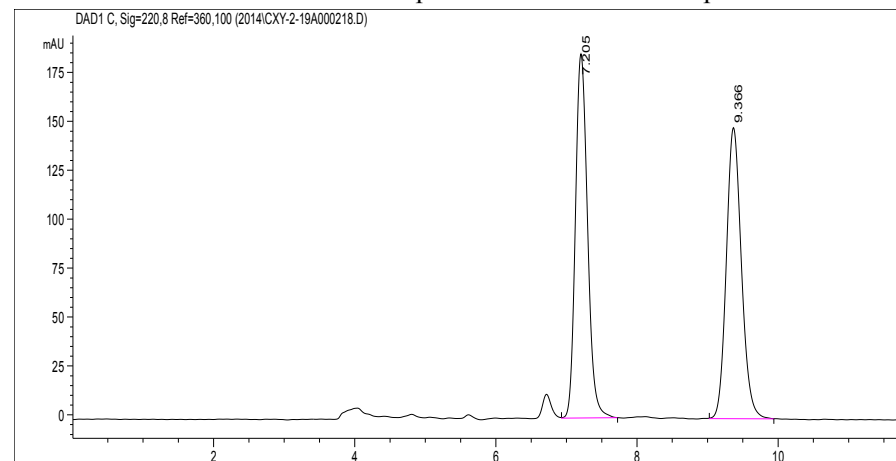

信号 2: DAD1 C, Sig=220,8 Ref=360,100

| 峰 # | 保留时间 [min] | 类型 | 峰宽 [min] | 峰面积 [mAU*s] | 峰高 [mAU]  | 峰面积 %   |
|-----|------------|----|----------|-------------|-----------|---------|
| 1   | 7.205      | VB | 0.1874   | 2224.38403  | 186.17825 | 50.1371 |
| 2   | 9.366      | BB | 0.2294   | 2212.22192  | 148.81844 | 49.8629 |

总量 : 4436.60596 334.99669

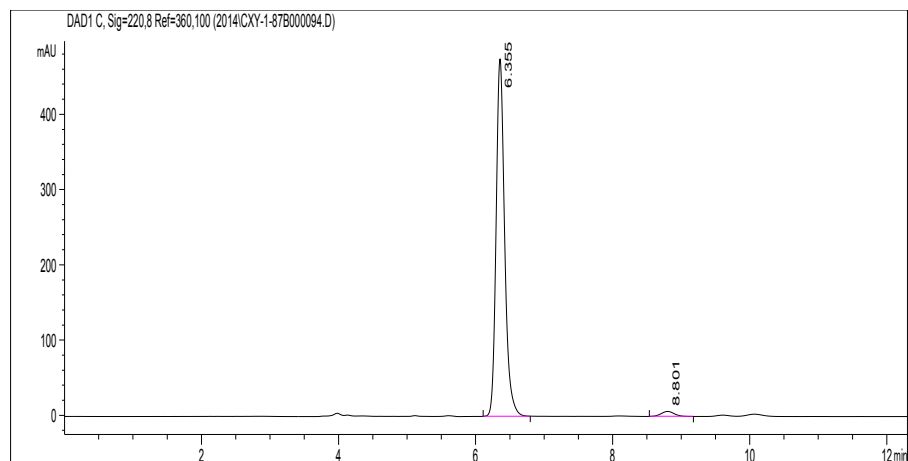

信号 2: DAD1 C, Sig=220,8 Ref=360,100

| 峰 # | 保留时间 [min] | 类型 | 峰宽 [min] | 峰面积 [mAU*s] | 峰高 [mAU]  | 峰面积 %   |
|-----|------------|----|----------|-------------|-----------|---------|
| 1   | 6.355      | BB | 0.1327   | 4102.70215  | 475.52829 | 97.8840 |
| 2   | 8.801      | BB | 0.2056   | 88.69110    | 6.64887   | 2.1160  |

总量 : 4191.39325 482.17716

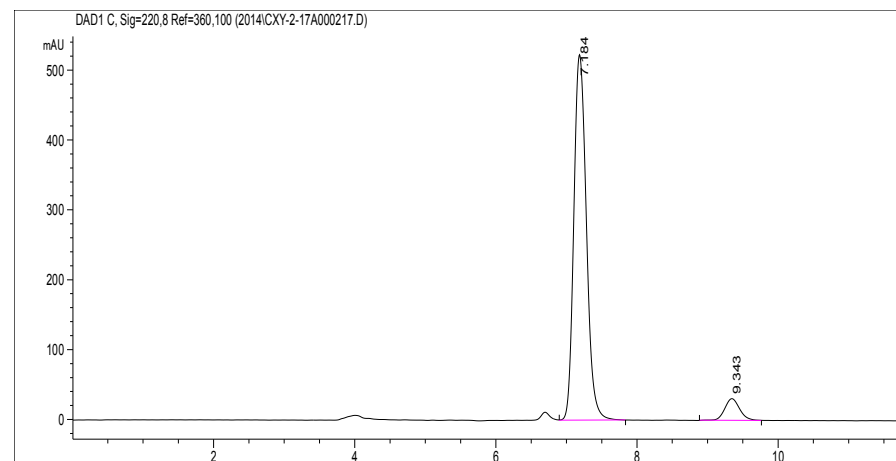

信号 2: DAD1 C, Sig=220,8 Ref=360,100

| 峰 # | 保留时间 [min] | 类型 | 峰宽 [min] | 峰面积 [mAU*s] | 峰高 [mAU]  | 峰面积 %   |
|-----|------------|----|----------|-------------|-----------|---------|
| 1   | 7.184      | VB | 0.1961   | 6459.75684  | 522.95007 | 93.3360 |
| 2   | 9.343      | BB | 0.2267   | 461.21164   | 31.14886  | 6.6640  |

总量 : 6920.96848 554.09893

### HPLC for racemic and pure enantioenriched sample 4f

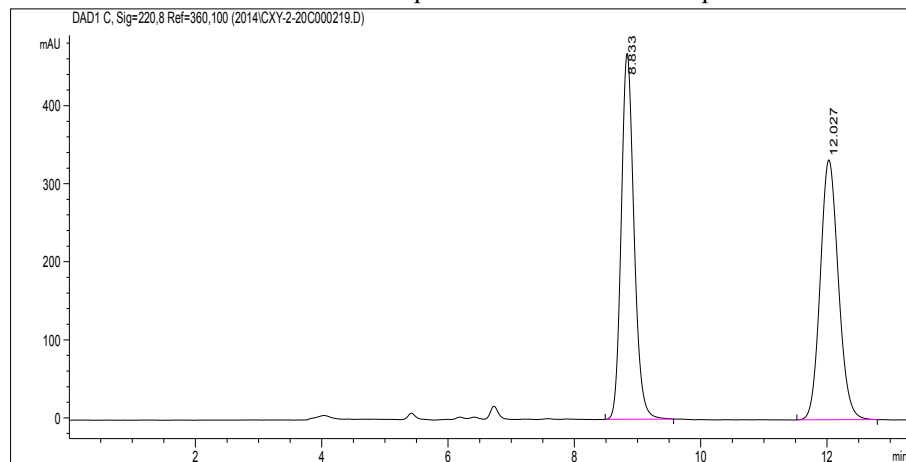

信号 2: DAD1 C, Sig=220,8 Ref=360,100

| 峰 # | 保留时间 [min] | 类型 | 峰宽 [min] | 峰面积 [mAU*s] | 峰高 [mAU]  | 峰面积 %   |
|-----|------------|----|----------|-------------|-----------|---------|
| 1   | 8.833      | BB | 0.2164   | 6607.58252  | 468.86636 | 49.8497 |
| 2   | 12.027     | BB | 0.3089   | 6647.43701  | 333.02460 | 50.1503 |

总量 : 1.32550e4 801.89096

### HPLC for racemic and pure enantioenriched sample 4g

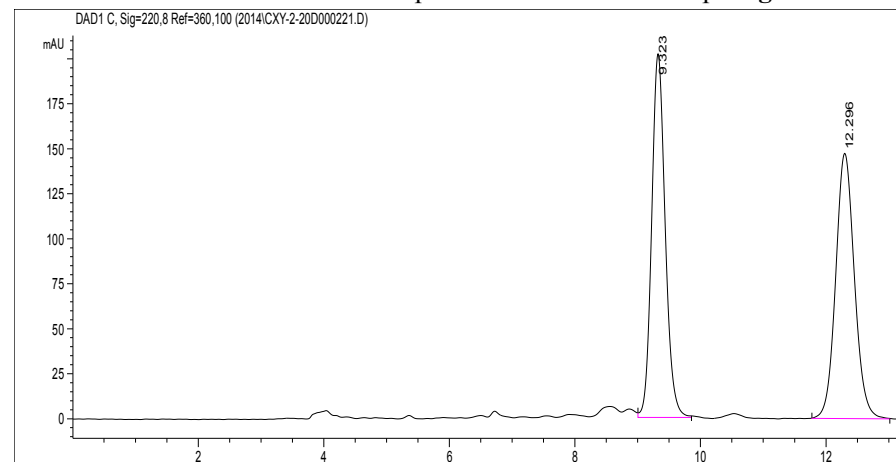

信号 2: DAD1 C, Sig=220,8 Ref=360,100

| 峰 # | 保留时间 [min] | 类型 | 峰宽 [min] | 峰面积 [mAU*s] | 峰高 [mAU]  | 峰面积 %   |
|-----|------------|----|----------|-------------|-----------|---------|
| 1   | 9.323      | VB | 0.2288   | 3027.01074  | 202.04700 | 49.7277 |
| 2   | 12.296     | BB | 0.3202   | 3060.16162  | 147.43176 | 50.2723 |

总量 : 6087.17236 349.47876

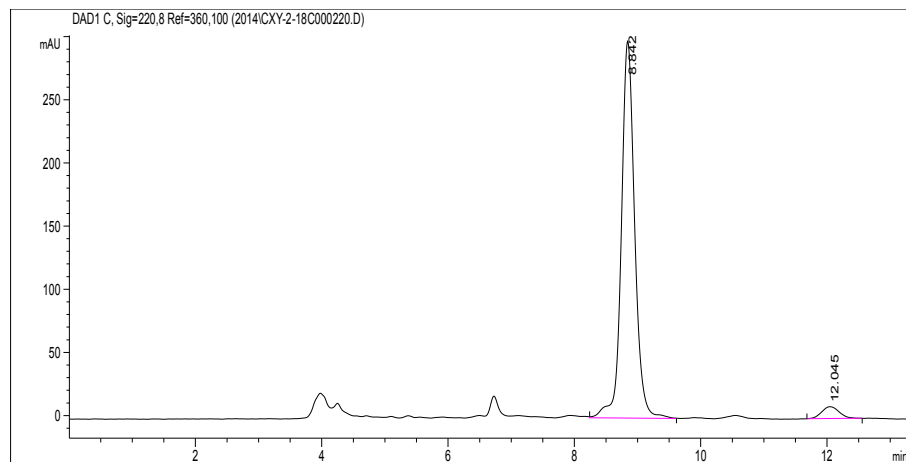

信号 2: DAD1 C, Sig=220,8 Ref=360,100

| 峰 # | 保留时间 [min] | 类型 | 峰宽 [min] | 峰面积 [mAU*s] | 峰高 [mAU]  | 峰面积 %   |
|-----|------------|----|----------|-------------|-----------|---------|
| 1   | 8.842      | VB | 0.2218   | 4395.56738  | 298.44586 | 95.9480 |
| 2   | 12.045     | BB | 0.3010   | 185.63002   | 9.45831   | 4.0520  |

总量 : 4581.19740 307.90417

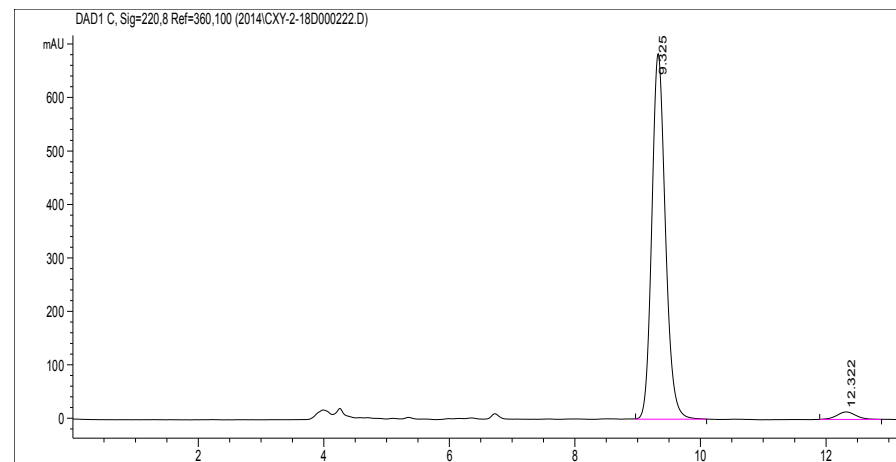

信号 2: DAD1 C, Sig=220,8 Ref=360,100

| 峰 # | 保留时间 [min] | 类型 | 峰宽 [min] | 峰面积 [mAU*s] | 峰高 [mAU]  | 峰面积 %   |
|-----|------------|----|----------|-------------|-----------|---------|
| 1   | 9.325      | BB | 0.2298   | 1.03054e4   | 683.76392 | 97.1335 |
| 2   | 12.322     | BB | 0.3260   | 304.12646   | 14.07875  | 2.8665  |

总量 : 1.06095e4 697.84266

### HPLC for racemic and pure enantioenriched sample 4h

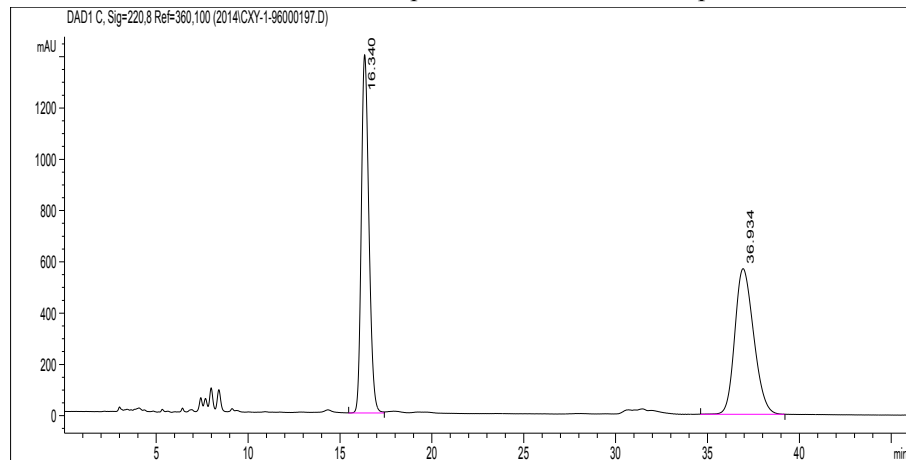

信号 2: DAD1 C, Sig=220,8 Ref=360,100

| 峰 # | 保留时间 [min] | 类型 | 峰宽 [min] | 峰面积 [mAU*s] | 峰高 [mAU]   | 峰面积 %   |
|-----|------------|----|----------|-------------|------------|---------|
| 1   | 16.340     | VB | 0.4452   | 4.01542e4   | 1397.59692 | 49.7229 |
| 2   | 36.934     | BB | 1.1236   | 4.06018e4   | 568.26166  | 50.2771 |

总量 : 8.07560e4 1965.85858

### HPLC for racemic and pure enantioenriched sample 4i

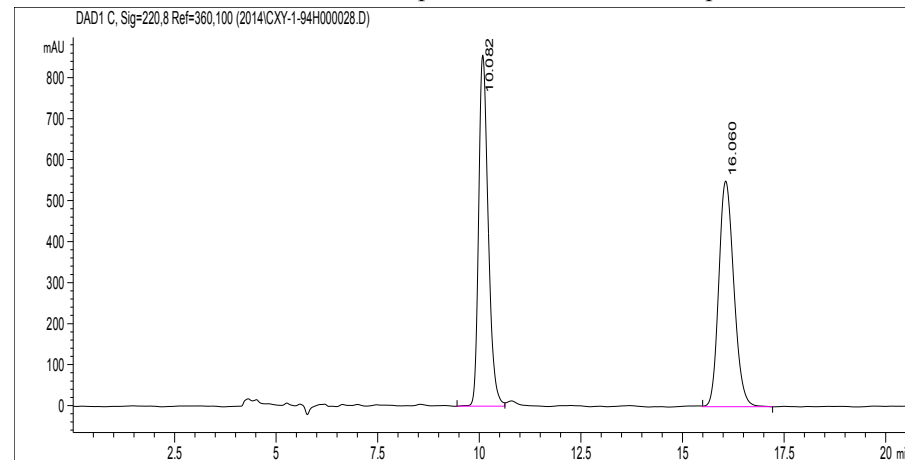

信号 2: DAD1 C, Sig=220,8 Ref=360,100

| 峰 # | 保留时间 [min] | 类型 | 峰宽 [min] | 峰面积 [mAU*s] | 峰高 [mAU]  | 峰面积 %   |
|-----|------------|----|----------|-------------|-----------|---------|
| 1   | 10.082     | EV | 0.2470   | 1.40130e4   | 856.15204 | 49.5989 |
| 2   | 16.060     | VB | 0.3956   | 1.42396e4   | 550.74084 | 50.4011 |

总量 : 2.82526e4 1406.89288

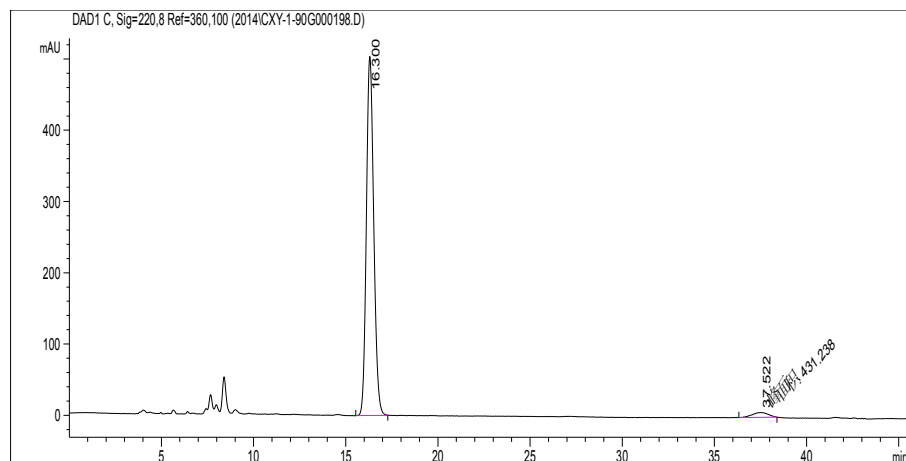

信号 2: DAD1 C, Sig=220,8 Ref=360,100

| 峰 # | 保留时间 [min] | 类型 | 峰宽 [min] | 峰面积 [mAU*s] | 峰高 [mAU]  | 峰面积 %   |
|-----|------------|----|----------|-------------|-----------|---------|
| 1   | 16.300     | VB | 0.4276   | 1.39786e4   | 503.98010 | 97.0073 |
| 2   | 37.522     | MM | 1.0318   | 431.23782   | 6.96586   | 2.9927  |

总量 : 1.44099e4 510.94597

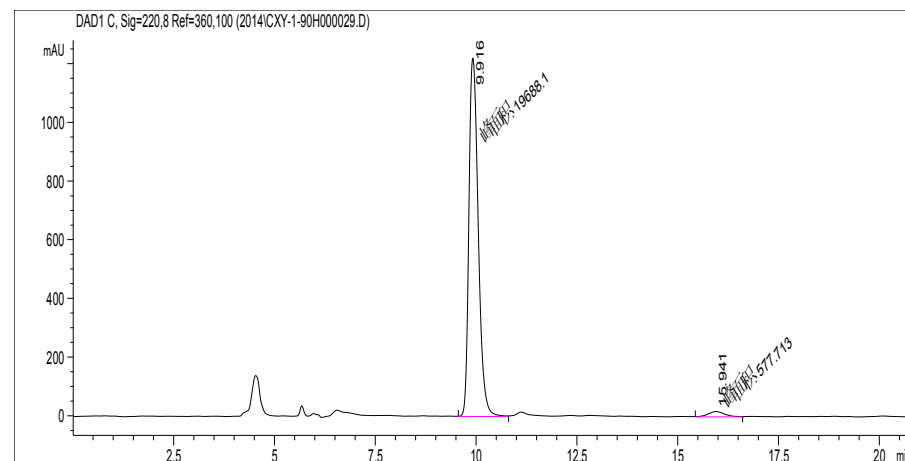

信号 2: DAD1 C, Sig=220,8 Ref=360,100

| 峰 # | 保留时间 [min] | 类型 | 峰宽 [min] | 峰面积 [mAU*s] | 峰高 [mAU]   | 峰面积 %   |
|-----|------------|----|----------|-------------|------------|---------|
| 1   | 9.916      | MM | 0.2686   | 1.96881e4   | 1221.48560 | 97.1493 |
| 2   | 15.941     | MM | 0.5090   | 577.71265   | 18.91502   | 2.8507  |

总量 : 2.02658e4 1240.40062

### HPLC for racemic and pure enantioenriched sample 4j

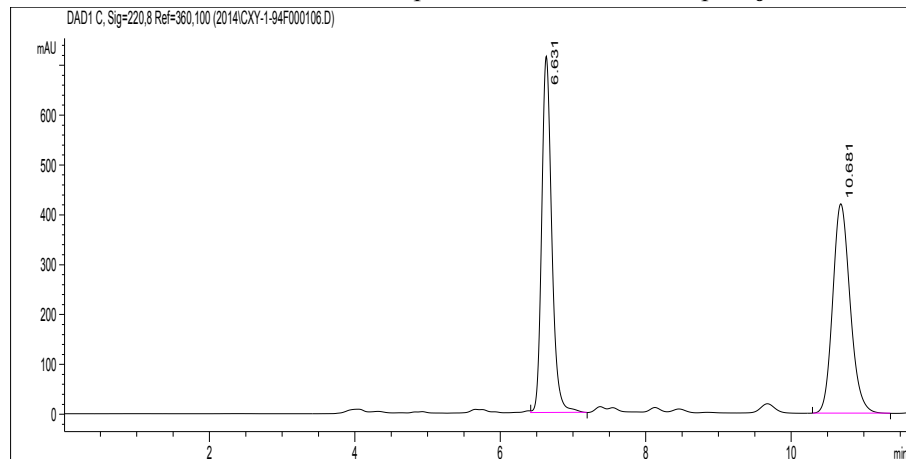

信号 2: DAD1 C, Sig=220,8 Ref=360,100

| 峰 # | 保留时间 [min] | 类型 | 峰宽 [min] | 峰面积 [mAU*s] | 峰高 [mAU]  | 峰面积 %   |
|-----|------------|----|----------|-------------|-----------|---------|
| 1   | 6.631      | VV | 0.1480   | 6866.25977  | 715.41711 | 49.5523 |
| 2   | 10.681     | BB | 0.2561   | 6990.33545  | 420.25735 | 50.4477 |

总量 : 1.38566e4 1135.67447

### HPLC for racemic and pure enantioenriched sample 4k

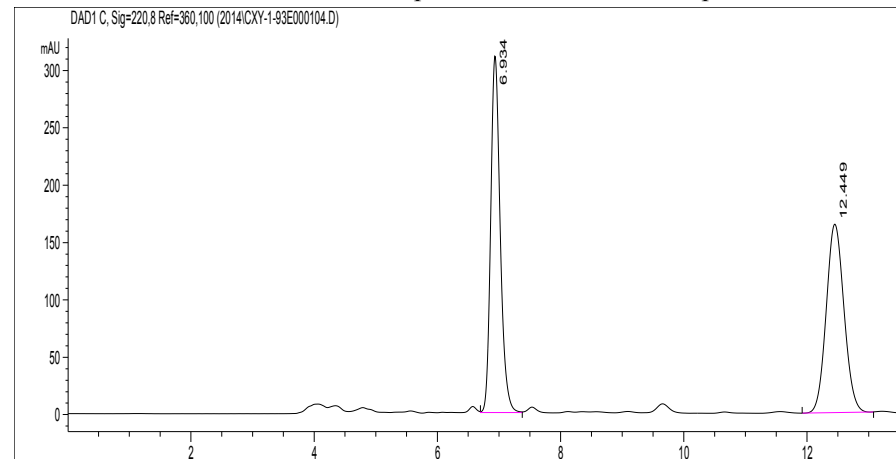

信号 2: DAD1 C, Sig=220,8 Ref=360,100

| 峰 # | 保留时间 [min] | 类型 | 峰宽 [min] | 峰面积 [mAU*s] | 峰高 [mAU]  | 峰面积 %   |
|-----|------------|----|----------|-------------|-----------|---------|
| 1   | 6.934      | VV | 0.1651   | 3334.88257  | 310.93454 | 50.3115 |
| 2   | 12.449     | VB | 0.3097   | 3293.59229  | 164.39861 | 49.6885 |

总量 : 6628.47485 475.33315

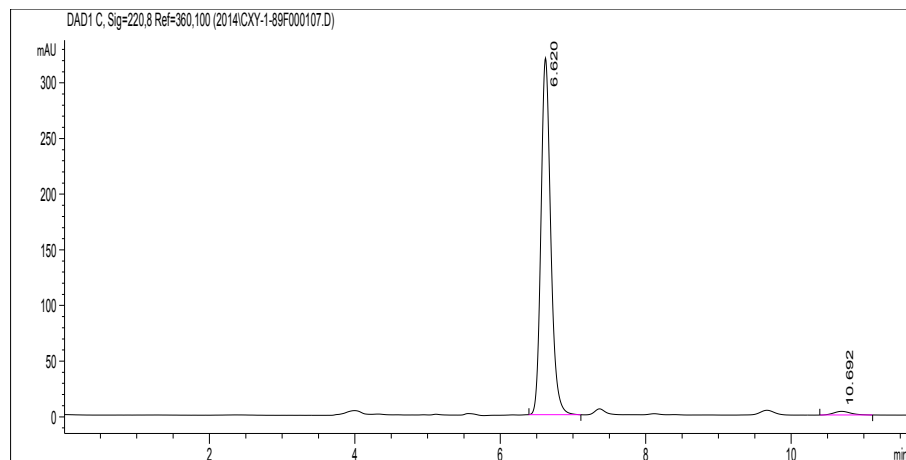

信号 2: DAD1 C, Sig=220,8 Ref=360,100

| 峰 # | 保留时间 [min] | 类型 | 峰宽 [min] | 峰面积 [mAU*s] | 峰高 [mAU]  | 峰面积 %   |
|-----|------------|----|----------|-------------|-----------|---------|
| 1   | 6.620      | BB | 0.1428   | 2990.46167  | 320.57642 | 98.1537 |
| 2   | 10.692     | BB | 0.2566   | 56.25220    | 3.33892   | 1.8463  |

总量 : 3046.71387 323.91534

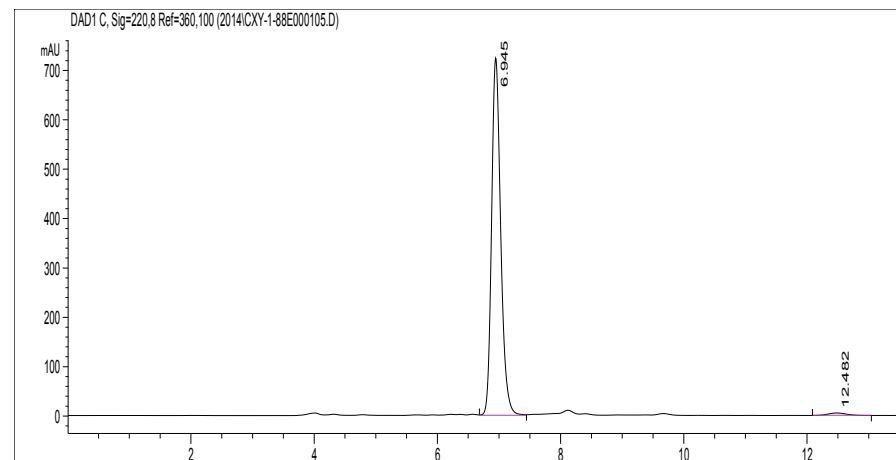

信号 2: DAD1 C, Sig=220,8 Ref=360,100

| 峰 # | 保留时间 [min] | 类型 | 峰宽 [min] | 峰面积 [mAU*s] | 峰高 [mAU]  | 峰面积 %   |
|-----|------------|----|----------|-------------|-----------|---------|
| 1   | 6.945      | VV | 0.1581   | 7450.79297  | 723.85913 | 98.6527 |
| 2   | 12.482     | BB | 0.3210   | 101.75320   | 5.00923   | 1.3473  |

总量 : 7552.54617 728.86836



### HPLC for racemic and pure enantioenriched sample 4I

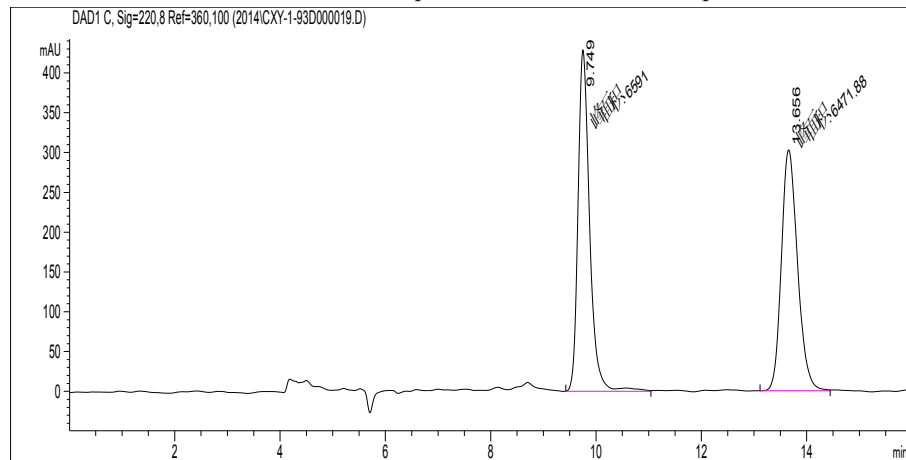

信号 2: DAD1 C, Sig=220,8 Ref=360,100

| 峰 # | 保留时间 [min] | 类型 | 峰宽 [min] | 峰面积 [mAU*s] | 峰高 [mAU]  | 峰面积 %   |
|-----|------------|----|----------|-------------|-----------|---------|
| 1   | 9.749      | MM | 0.2562   | 6590.99561  | 428.69244 | 50.4559 |
| 2   | 13.656     | MM | 0.3562   | 6471.88281  | 302.83783 | 49.5441 |

总量 : 1.30629e4 731.53027

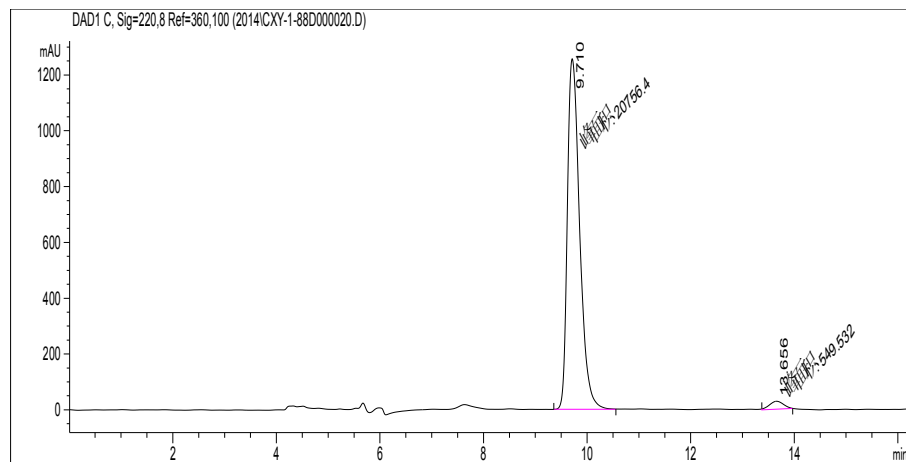

信号 2: DAD1 C, Sig=220,8 Ref=360,100

| 峰 # | 保留时间 [min] | 类型 | 峰宽 [min] | 峰面积 [mAU*s] | 峰高 [mAU]   | 峰面积 %   |
|-----|------------|----|----------|-------------|------------|---------|
| 1   | 9.710      | MM | 0.2752   | 2.07564e4   | 1257.24915 | 97.4208 |
| 2   | 13.656     | MM | 0.3172   | 549.53210   | 28.87473   | 2.5792  |

总量 : 2.13060e4 1286.12388
